# Supplementary material for: Pleistocene-Holocene sedaDNA reconstruction of Southern Doggerland reveals early colonization before inundation consistent with northern refugia.
Source: Research Square preprint supplement (doi:10.21203/rs.3.rs-3296992/v1), 2023-09-21
Supplement: Supplementary file 1 [file 0e566cf26c4f2bc505773772.xlsx]

## Sheet: guild_membership_scores.r
	ELF053_336	ELF053_289	ELF053_275	ELF053_214	ELF053_179	ELF049_361	ELF049_295	ELF050_595	ELF050_450	ELF050_354	ELF050_250	ELF047_386	ELF047_350	ELF047_325	ELF047_274	ELF047_241	ELF047_205	ELF047_175	ELF047_150	ELF047_115	ELF047_70	ELF047_50	ELF047_25	ELF047A_354	ELF047A_256	ELF047A_150	ELF047A_050	ELF045_522	ELF045_503	ELF045_475	ELF045_450	ELF045_430	ELF045_405	ELF045_375	ELF045_346	ELF045_310	ELF045_275	ELF045_252	ELF045_225	ELF045_180	ELF045_145	ELF045_105	ELF045_90	ELF045_50	ELF045_25	ELF051_310	ELF051_292	ELF051_255	ELF051_215
ELF053_336	0	0.628534	1.55556	0.666667	0.555556	0.598437	0.599476	0.555556	1.23556	1.55556	0.555556	1.23339	1.34	1.45548	1.28489	1.18278	0.83695	1.07453	0.99583	0.731387	0.742756	0.700735	0.599985	0.622222	0.925926	1.05556	1.19494	0.995617	0.760635	1.05894	1.42063	0.60669	0.524444	0.617388	0.773187	1.11111	0.651022	1.02248	0.580853	0.797885	1.12149	0.559593	1.28761	0.744966	0.526701	0.559259	0.685436	0.507167	0.455606
ELF053_289	0.628534	0	0.662722	0.577252	0.12426	0.472642	0.480436	0.12426	0.742722	1.12426	0.12426	0.688106	0.777501	0.881422	0.737694	0.642234	0.420499	0.550378	0.492204	0.292121	0.231282	0.275417	0.263301	0.300329	0.420557	0.547337	0.686717	0.478852	0.289178	0.559045	0.849447	0.175395	0.267508	0.23481	0.295331	0.474688	0.217676	0.507551	0.253038	0.300133	0.585591	0.26945	0.744875	0.329237	0.336375	0.428918	0.339897	0.273596	0.178605
ELF053_275	1.55556	0.662722	0	1.55556	1	1.30499	1.33078	1	1.68	2	1	1.70094	1.78692	1.90286	1.75144	1.64793	1.31648	1.54211	1.48468	1.26322	1.19249	1.19025	1.19416	1.28889	1.40741	1.5	1.69393	1.4734	1.22889	1.56399	1.86856	1.12957	1.23556	1.21335	1.26196	1.55556	1.1888	1.49187	1.20982	1.27634	1.57894	1.25546	1.75743	1.32239	1.33342	1.35485	1.32791	1.13787	1.01667
ELF053_214	0.666667	0.577252	1.55556	0	0.555556	0.1312	0.1307	0.555556	1.23556	1.55556	0.555556	1.20864	1.32371	1.44567	1.25115	1.1538	0.801862	1.03163	0.932223	0.626518	0.695137	0.649453	0.425297	0.355556	0.888889	1.05556	1.10706	0.962284	0.716417	0.987386	1.41016	0.502115	0.257778	0.432539	0.716921	1.11111	0.557689	0.981669	0.368056	0.763872	1.08942	0.290694	1.23686	0.579078	0.194466	0.140798	0.462782	0.162865	0.342875
ELF053_179	0.555556	0.12426	1	0.555556	0	0.510118	0.508705	0	0.68	1	0	0.700936	0.795805	0.905804	0.754929	0.64793	0.316482	0.552203	0.490079	0.270713	0.208365	0.19957	0.211988	0.288889	0.407407	0.5	0.712107	0.473395	0.239093	0.56753	0.873797	0.129566	0.235556	0.231529	0.267077	0.555556	0.1888	0.502077	0.223214	0.276343	0.584656	0.26056	0.764347	0.331728	0.334515	0.4187	0.345795	0.293676	0.162441
ELF049_361	0.598437	0.472642	1.30499	0.1312	0.510118	0	0.00292078	0.510118	1.19012	1.49302	0.510118	1.16193	1.28278	1.40325	1.21078	1.11452	0.750801	0.991044	0.894263	0.581389	0.669778	0.606565	0.365447	0.33177	0.839652	1.01012	1.06651	0.928622	0.675427	0.942602	1.36485	0.474776	0.184989	0.382128	0.679177	1.06567	0.499601	0.937045	0.320481	0.713724	1.0541	0.230209	1.2055	0.540756	0.128046	0.0501255	0.402596	0.0667303	0.264993
ELF049_295	0.599476	0.480436	1.33078	0.1307	0.508705	0.00292078	0	0.508705	1.18871	1.50528	0.508705	1.16004	1.28106	1.40178	1.20927	1.11266	0.747726	0.989049	0.892124	0.578873	0.666152	0.603948	0.361674	0.331555	0.838459	1.00785	1.06543	0.92702	0.670007	0.940978	1.36366	0.472653	0.185037	0.38128	0.676517	1.06426	0.497061	0.935364	0.317577	0.711045	1.05172	0.22962	1.20388	0.539483	0.129013	0.0523175	0.402748	0.0680197	0.268599
ELF050_595	0.555556	0.12426	1	0.555556	0	0.510118	0.508705	0	0.68	1	0	0.700936	0.795805	0.905804	0.754929	0.64793	0.316482	0.552203	0.490079	0.270713	0.208365	0.19957	0.211988	0.288889	0.407407	0.5	0.712107	0.473395	0.239093	0.56753	0.873797	0.129566	0.235556	0.231529	0.267077	0.555556	0.1888	0.502077	0.223214	0.276343	0.584656	0.26056	0.764347	0.331728	0.334515	0.4187	0.345795	0.293676	0.162441
ELF050_450	1.23556	0.742722	1.68	1.23556	0.68	1.19012	1.18871	0.68	0	1.68	0.68	1.38094	1.4758	1.5858	1.43214	1.31799	0.175429	1.22211	1.16684	0.943721	0.872492	0.823626	0.88058	0.968889	1.08741	1.18	1.39211	1.1534	0.88644	1.24751	1.5538	0.684075	0.915556	0.882438	0.930709	1.10222	0.8688	1.11133	0.902321	0.92369	1.26382	0.940415	1.44435	1.00372	1.00902	1.08103	1.02564	0.968035	0.816785
ELF050_354	1.55556	1.12426	2	1.55556	1	1.49302	1.50528	1	1.68	0	1	1.70094	1.79136	1.9058	1.75493	1.64793	1.31648	1.55094	1.49008	1.27071	1.20836	1.19957	1.21199	1.28889	1.40741	1.5	1.71211	1.4734	1.23909	1.56652	1.86333	1.12957	1.23556	1.22244	1.26708	1.55556	1.1888	1.50208	1.22321	1.27634	1.58414	1.26056	1.76435	1.33173	1.33452	1.41499	1.34346	1.24801	0.684307
ELF050_250	0.555556	0.12426	1	0.555556	0	0.510118	0.508705	0	0.68	1	0	0.700936	0.795805	0.905804	0.754929	0.64793	0.316482	0.552203	0.490079	0.270713	0.208365	0.19957	0.211988	0.288889	0.407407	0.5	0.712107	0.473395	0.239093	0.56753	0.873797	0.129566	0.235556	0.231529	0.267077	0.555556	0.1888	0.502077	0.223214	0.276343	0.584656	0.26056	0.764347	0.331728	0.334515	0.4187	0.345795	0.293676	0.162441
ELF047_386	1.23339	0.688106	1.70094	1.20864	0.700936	1.16193	1.16004	0.700936	1.38094	1.70094	0.700936	0	0.00453329	0.0165761	0.00244969	0.00559111	0.859002	0.0121176	0.0255458	0.168652	0.2556	0.585324	0.692464	0.294776	0.0841412	0.364303	0.00971329	0.0466085	0.721942	0.0142632	0.0137076	0.387093	0.674116	0.266286	0.134823	0.144281	0.236073	0.0236584	0.593197	0.697627	0.00913511	0.463844	0.00516091	0.131565	0.59436	1.04492	0.205559	0.946394	0.83086
ELF047_350	1.34	0.777501	1.78692	1.32371	0.795805	1.28278	1.28106	0.795805	1.4758	1.79136	0.795805	0.00453329	0	0.00418215	0.00130028	0.011768	0.955912	0.0299475	0.0498362	0.224665	0.317209	0.665021	0.800052	0.357385	0.111854	0.403212	0.0131646	0.0685495	0.824229	0.0314072	0.00295083	0.462916	0.774866	0.333111	0.184166	0.163212	0.298382	0.045712	0.689386	0.792314	0.0234591	0.548441	0.00280674	0.178056	0.685381	1.17043	0.261059	1.06343	0.93928
ELF047_325	1.45548	0.881422	1.90286	1.44567	0.905804	1.40325	1.40178	0.905804	1.5858	1.9058	0.905804	0.0165761	0.00418215	0	0.00837722	0.0277209	1.06304	0.0558423	0.0819534	0.28871	0.386018	0.760304	0.916398	0.426458	0.148996	0.452863	0.0241018	0.0982682	0.936757	0.0565224	0.000575023	0.546212	0.878811	0.404366	0.24256	0.192733	0.366546	0.0761785	0.794184	0.88827	0.0464258	0.637564	0.00943472	0.230502	0.778367	1.29378	0.320046	1.18239	1.0561
ELF047_274	1.28489	0.737694	1.75144	1.25115	0.754929	1.21078	1.20927	0.754929	1.43214	1.75493	0.754929	0.00244969	0.00130028	0.00837722	0	0.00769569	0.918246	0.0231488	0.0396916	0.201177	0.291862	0.629435	0.755389	0.320374	0.097182	0.384074	0.00695368	0.0568869	0.785096	0.0221364	0.00593612	0.42732	0.721723	0.298151	0.164304	0.153998	0.268196	0.0370448	0.643618	0.752574	0.0189493	0.503148	0.00109576	0.152221	0.63257	1.10461	0.229873	0.999373	0.88675
ELF047_241	1.18278	0.642234	1.64793	1.1538	0.64793	1.11452	1.11266	0.64793	1.31799	1.64793	0.64793	0.00559111	0.011768	0.0277209	0.00769569	0	0.819757	0.0125403	0.023329	0.149759	0.232121	0.523187	0.646258	0.262699	0.0629291	0.334266	0.0117034	0.0372673	0.668301	0.0109477	0.0227844	0.349046	0.626757	0.240159	0.11556	0.135163	0.211886	0.0211566	0.543144	0.664291	0.0115996	0.425497	0.00842128	0.11398	0.556195	1.00849	0.190706	0.900994	0.782448
ELF047_205	0.83695	0.420499	1.31648	0.801862	0.316482	0.750801	0.747726	0.316482	0.175429	1.31648	0.316482	0.859002	0.955912	1.06304	0.918246	0.819757	0	0.701925	0.647387	0.43891	0.435457	0.412629	0.395624	0.500108	0.62155	0.737535	0.884451	0.674672	0.473674	0.735448	1.0379	0.298473	0.467827	0.427317	0.444038	0.766774	0.408966	0.616491	0.449823	0.538314	0.73549	0.472612	0.934772	0.524724	0.542351	0.584662	0.518502	0.538845	0.423836
ELF047_175	1.07453	0.550378	1.54211	1.03163	0.552203	0.991044	0.989049	0.552203	1.22211	1.55094	0.552203	0.0121176	0.0299475	0.0558423	0.0231488	0.0125403	0.701925	0	0.00295963	0.0943362	0.178074	0.460996	0.533706	0.211355	0.05565	0.316557	0.0237257	0.0310383	0.579286	0.00518619	0.0504081	0.28266	0.535225	0.181679	0.0705377	0.128579	0.155943	0.00319522	0.457101	0.579335	0.00141109	0.350253	0.0271042	0.0774184	0.471938	0.86415	0.136679	0.780012	0.671679
ELF047_150	0.99583	0.492204	1.48468	0.932223	0.490079	0.894263	0.892124	0.490079	1.16684	1.49008	0.490079	0.0255458	0.0498362	0.0819534	0.0396916	0.023329	0.647387	0.00295963	0	0.0664561	0.148389	0.41068	0.46512	0.168707	0.0480016	0.30151	0.034058	0.0293308	0.521463	0.00681503	0.0748486	0.237795	0.464729	0.141688	0.0487784	0.128143	0.121795	0.00294774	0.394059	0.528009	0.00731042	0.29304	0.043484	0.0527675	0.40541	0.770319	0.102914	0.691485	0.596179
ELF047_115	0.731387	0.292121	1.26322	0.626518	0.270713	0.581389	0.578873	0.270713	0.943721	1.27071	0.270713	0.168652	0.224665	0.28871	0.201177	0.149759	0.43891	0.0943362	0.0664561	0	0.072859	0.245799	0.18066	0.0722108	0.0965553	0.307542	0.175897	0.10404	0.25236	0.0927879	0.274132	0.100237	0.221624	0.0383158	0.0125415	0.209539	0.0436575	0.077124	0.144735	0.341891	0.113208	0.105527	0.204553	0.0266593	0.198477	0.455548	0.0496345	0.399061	0.330104
ELF047_70	0.742756	0.231282	1.19249	0.695137	0.208365	0.669778	0.666152	0.208365	0.872492	1.20836	0.208365	0.2556	0.317209	0.386018	0.291862	0.232121	0.435457	0.178074	0.148389	0.072859	0	0.238252	0.245721	0.158629	0.142227	0.311539	0.273791	0.139255	0.193895	0.186006	0.367253	0.0699565	0.272492	0.0735157	0.0528786	0.250693	0.0568474	0.161068	0.198338	0.140361	0.199945	0.182465	0.29896	0.0896125	0.297293	0.561092	0.15146	0.438634	0.294171
ELF047_50	0.700735	0.275417	1.19025	0.649453	0.19957	0.606565	0.603948	0.19957	0.823626	1.19957	0.19957	0.585324	0.665021	0.760304	0.629435	0.523187	0.412629	0.460996	0.41068	0.245799	0.238252	0	0.278861	0.286749	0.376208	0.508427	0.594301	0.415311	0.319401	0.472098	0.732443	0.156732	0.3049	0.229827	0.237672	0.515809	0.201889	0.421094	0.269167	0.370066	0.487274	0.269485	0.638302	0.292326	0.350914	0.50525	0.304748	0.406346	0.302723
ELF047_25	0.599985	0.263301	1.19416	0.425297	0.211988	0.365447	0.361674	0.211988	0.88058	1.21199	0.211988	0.692464	0.800052	0.916398	0.755389	0.646258	0.395624	0.533706	0.46512	0.18066	0.245721	0.278861	0	0.206878	0.469464	0.612166	0.698394	0.519766	0.101004	0.5224	0.890061	0.174345	0.11623	0.164648	0.244372	0.634448	0.215333	0.488574	0.0243206	0.343582	0.576193	0.0890746	0.757484	0.276393	0.151584	0.235675	0.254684	0.215474	0.195271
ELF047A_354	0.622222	0.300329	1.28889	0.355556	0.288889	0.33177	0.331555	0.288889	0.968889	1.28889	0.288889	0.294776	0.357385	0.426458	0.320374	0.262699	0.500108	0.211355	0.168707	0.0722108	0.158629	0.286749	0.206878	0	0.148148	0.388889	0.254936	0.195617	0.358934	0.187074	0.405967	0.12303	0.133333	0.032539	0.10311	0.311111	0.0776889	0.189378	0.135317	0.408769	0.240125	0.0481992	0.315981	0.0444105	0.0737337	0.27923	0.0248864	0.235486	0.260465
ELF047A_256	0.925926	0.420557	1.40741	0.888889	0.407407	0.839652	0.838459	0.407407	1.08741	1.40741	0.407407	0.0841412	0.111854	0.148996	0.097182	0.0629291	0.62155	0.05565	0.0480016	0.0965553	0.142227	0.376208	0.469464	0.148148	0	0.185185	0.0841613	0.0326543	0.508745	0.0563426	0.136353	0.201461	0.405926	0.139946	0.0598212	0.148148	0.100652	0.0489399	0.384094	0.488739	0.0631037	0.286541	0.100628	0.0692814	0.392472	0.744733	0.123688	0.636685	0.527412
ELF047A_150	1.05556	0.547337	1.5	1.05556	0.5	1.01012	1.00785	0.5	1.18	1.5	0.5	0.364303	0.403212	0.452863	0.384074	0.334266	0.737535	0.316557	0.30151	0.307542	0.311539	0.508427	0.612166	0.388889	0.185185	0	0.375744	0.201173	0.626848	0.324717	0.434007	0.335448	0.468889	0.336074	0.227435	0.388889	0.2488	0.294594	0.533482	0.613078	0.325685	0.469333	0.392374	0.297372	0.587812	0.89383	0.358626	0.788303	0.627455
ELF047A_050	1.19494	0.686717	1.69393	1.10706	0.712107	1.06651	1.06543	0.712107	1.39211	1.71211	0.712107	0.00971329	0.0131646	0.0241018	0.00695368	0.0117034	0.884451	0.0237257	0.034058	0.175897	0.273791	0.594301	0.698394	0.254936	0.0841613	0.375744	0	0.0515631	0.756627	0.0152211	0.019603	0.387484	0.636148	0.247314	0.149284	0.152511	0.233453	0.0353035	0.579498	0.721289	0.0239814	0.428845	0.00567716	0.114446	0.535978	0.982488	0.175477	0.886387	0.807334
ELF045_522	0.995617	0.478852	1.4734	0.962284	0.473395	0.928622	0.92702	0.473395	1.1534	1.4734	0.473395	0.0466085	0.0685495	0.0982682	0.0568869	0.0372673	0.674672	0.0310383	0.0293308	0.10404	0.139255	0.415311	0.519766	0.195617	0.0326543	0.201173	0.0515631	0	0.528078	0.0323716	0.0877683	0.206011	0.443765	0.154621	0.0607619	0.132654	0.110195	0.0308005	0.423841	0.489081	0.0367183	0.322775	0.0598102	0.068632	0.441134	0.828431	0.140117	0.71597	0.588314
ELF045_503	0.760635	0.289178	1.22889	0.716417	0.239093	0.675427	0.670007	0.239093	0.88644	1.23909	0.239093	0.721942	0.824229	0.936757	0.785096	0.668301	0.473674	0.579286	0.521463	0.25236	0.193895	0.319401	0.101004	0.358934	0.508745	0.626848	0.756627	0.528078	0	0.5744	0.909076	0.182784	0.267506	0.238108	0.280636	0.651791	0.26524	0.541565	0.102295	0.197288	0.621291	0.226088	0.788677	0.355222	0.357268	0.545103	0.415986	0.428295	0.287504
ELF045_475	1.05894	0.559045	1.56399	0.987386	0.56753	0.942602	0.940978	0.56753	1.24751	1.56652	0.56753	0.0142632	0.0314072	0.0565224	0.0221364	0.0109477	0.735448	0.00518619	0.00681503	0.0927879	0.186006	0.472098	0.5224	0.187074	0.0563426	0.324717	0.0152211	0.0323716	0.5744	0	0.0499962	0.283876	0.50666	0.166908	0.0759928	0.132878	0.155572	0.00947921	0.430605	0.589322	0.00950638	0.31938	0.0226832	0.0641348	0.432023	0.836838	0.120429	0.750977	0.663912
ELF045_450	1.42063	0.849447	1.86856	1.41016	0.873797	1.36485	1.36366	0.873797	1.5538	1.86333	0.873797	0.0137076	0.00295083	0.000575023	0.00593612	0.0227844	1.0379	0.0504081	0.0748486	0.274132	0.367253	0.732443	0.890061	0.405967	0.136353	0.434007	0.019603	0.0877683	0.909076	0.0499962	0	0.521174	0.847224	0.383384	0.228259	0.18328	0.346262	0.0695022	0.766982	0.859992	0.0421926	0.612356	0.00684634	0.215036	0.750727	1.26055	0.303489	1.14628	1.01914
ELF045_430	0.60669	0.175395	1.12957	0.502115	0.129566	0.474776	0.472653	0.129566	0.684075	1.12957	0.129566	0.387093	0.462916	0.546212	0.42732	0.349046	0.298473	0.28266	0.237795	0.100237	0.0699565	0.156732	0.174345	0.12303	0.201461	0.335448	0.387484	0.206011	0.182784	0.283876	0.521174	0	0.132441	0.0603815	0.0940499	0.345252	0.0462087	0.248489	0.134292	0.191423	0.313142	0.119842	0.431873	0.112852	0.197845	0.385245	0.144589	0.283445	0.183277
ELF045_405	0.524444	0.267508	1.23556	0.257778	0.235556	0.184989	0.185037	0.235556	0.915556	1.23556	0.235556	0.674116	0.774866	0.878811	0.721723	0.626757	0.467827	0.535225	0.464729	0.221624	0.272492	0.3049	0.11623	0.133333	0.405926	0.468889	0.636148	0.443765	0.267506	0.50666	0.847224	0.132441	0	0.124054	0.262905	0.613333	0.163022	0.4916	0.0772222	0.369042	0.582388	0.0532083	0.720779	0.227324	0.0579828	0.132157	0.182906	0.106308	0.145324
ELF045_375	0.617388	0.23481	1.21335	0.432539	0.231529	0.382128	0.38128	0.231529	0.882438	1.22244	0.231529	0.266286	0.333111	0.404366	0.298151	0.240159	0.427317	0.181679	0.141688	0.0383158	0.0735157	0.229827	0.164648	0.032539	0.139946	0.336074	0.247314	0.154621	0.238108	0.166908	0.383384	0.0603815	0.124054	0	0.0578945	0.277994	0.0303289	0.159703	0.101253	0.259635	0.211821	0.0422165	0.299084	0.0268326	0.0962788	0.310997	0.032658	0.242758	0.214749
ELF045_346	0.773187	0.295331	1.26196	0.716921	0.267077	0.679177	0.676517	0.267077	0.930709	1.26708	0.267077	0.134823	0.184166	0.24256	0.164304	0.11556	0.444038	0.0705377	0.0487784	0.0125415	0.0528786	0.237672	0.244372	0.10311	0.0598212	0.227435	0.149284	0.0607619	0.280636	0.0759928	0.228259	0.0940499	0.262905	0.0578945	0	0.174721	0.0364397	0.0547984	0.201391	0.323732	0.0850198	0.158377	0.169894	0.0326611	0.267127	0.550126	0.0748274	0.470602	0.362619
ELF045_310	1.11111	0.474688	1.55556	1.11111	0.555556	1.06567	1.06426	0.555556	1.10222	1.55556	0.555556	0.144281	0.163212	0.192733	0.153998	0.135163	0.766774	0.128579	0.128143	0.209539	0.250693	0.515809	0.634448	0.311111	0.148148	0.388889	0.152511	0.132654	0.651791	0.132878	0.18328	0.345252	0.613333	0.277994	0.174721	0	0.237689	0.127927	0.548115	0.627817	0.131024	0.451354	0.157272	0.184593	0.573221	0.964604	0.254643	0.844306	0.710222
ELF045_275	0.651022	0.217676	1.1888	0.557689	0.1888	0.499601	0.497061	0.1888	0.8688	1.1888	0.1888	0.236073	0.298382	0.366546	0.268196	0.211886	0.408966	0.155943	0.121795	0.0436575	0.0568474	0.201889	0.215333	0.0776889	0.100652	0.2488	0.233453	0.110195	0.26524	0.155572	0.346262	0.0462087	0.163022	0.0303289	0.0364397	0.237689	0	0.133938	0.162818	0.262286	0.179113	0.109717	0.274392	0.0427161	0.185843	0.406936	0.0657462	0.321912	0.245002
ELF045_252	1.02248	0.507551	1.49187	0.981669	0.502077	0.937045	0.935364	0.502077	1.11133	1.50208	0.502077	0.0236584	0.045712	0.0761785	0.0370448	0.0211566	0.616491	0.00319522	0.00294774	0.077124	0.161068	0.421094	0.488574	0.189378	0.0489399	0.294594	0.0353035	0.0308005	0.541565	0.00947921	0.0695022	0.248489	0.4916	0.159703	0.0547984	0.127927	0.133938	0	0.419556	0.551153	0.00641563	0.319178	0.0416629	0.0663111	0.436711	0.80824	0.120077	0.728175	0.621906
ELF045_225	0.580853	0.253038	1.20982	0.368056	0.223214	0.320481	0.317577	0.223214	0.902321	1.22321	0.223214	0.593197	0.689386	0.794184	0.643618	0.543144	0.449823	0.457101	0.394059	0.144735	0.198338	0.269167	0.0243206	0.135317	0.384094	0.533482	0.579498	0.423841	0.102295	0.430605	0.766982	0.134292	0.0772222	0.101253	0.201391	0.548115	0.162818	0.419556	0	0.307047	0.500841	0.037497	0.639949	0.197007	0.0927079	0.237548	0.188632	0.19073	0.181665
ELF045_180	0.797885	0.300133	1.27634	0.763872	0.276343	0.713724	0.711045	0.276343	0.92369	1.27634	0.276343	0.697627	0.792314	0.88827	0.752574	0.664291	0.538314	0.579335	0.528009	0.341891	0.140361	0.370066	0.343582	0.408769	0.488739	0.613078	0.721289	0.489081	0.197288	0.589322	0.859992	0.191423	0.369042	0.259635	0.323732	0.627817	0.262286	0.551153	0.307047	0	0.618722	0.340444	0.76578	0.368565	0.446808	0.619804	0.432657	0.469102	0.300984
ELF045_145	1.12149	0.585591	1.57894	1.08942	0.584656	1.0541	1.05172	0.584656	1.26382	1.58414	0.584656	0.00913511	0.0234591	0.0464258	0.0189493	0.0115996	0.73549	0.00141109	0.00731042	0.113208	0.199945	0.487274	0.576193	0.240125	0.0631037	0.325685	0.0239814	0.0367183	0.621291	0.00950638	0.0421926	0.313142	0.582388	0.211821	0.0850198	0.131024	0.179113	0.00641563	0.500841	0.618722	0	0.391026	0.0233937	0.0975551	0.518268	0.920552	0.160515	0.835967	0.719279
ELF045_105	0.559593	0.26945	1.25546	0.290694	0.26056	0.230209	0.22962	0.26056	0.940415	1.26056	0.26056	0.463844	0.548441	0.637564	0.503148	0.425497	0.472612	0.350253	0.29304	0.105527	0.182465	0.269485	0.0890746	0.0481992	0.286541	0.469333	0.428845	0.322775	0.226088	0.31938	0.612356	0.119842	0.0532083	0.0422165	0.158377	0.451354	0.109717	0.319178	0.037497	0.340444	0.391026	0	0.49955	0.108406	0.0221502	0.173251	0.0778516	0.141702	0.181711
ELF045_90	1.28761	0.744875	1.75743	1.23686	0.764347	1.2055	1.20388	0.764347	1.44435	1.76435	0.764347	0.00516091	0.00280674	0.00943472	0.00109576	0.00842128	0.934772	0.0271042	0.043484	0.204553	0.29896	0.638302	0.757484	0.315981	0.100628	0.392374	0.00567716	0.0598102	0.788677	0.0226832	0.00684634	0.431873	0.720779	0.299084	0.169894	0.157272	0.274392	0.0416629	0.639949	0.76578	0.0233937	0.49955	0	0.151796	0.627236	1.10695	0.230351	0.999838	0.892085
ELF045_50	0.744966	0.329237	1.32239	0.579078	0.331728	0.540756	0.539483	0.331728	1.00372	1.33173	0.331728	0.131565	0.178056	0.230502	0.152221	0.11398	0.524724	0.0774184	0.0527675	0.0266593	0.0896125	0.292326	0.276393	0.0444105	0.0692814	0.297372	0.114446	0.068632	0.355222	0.0641348	0.215036	0.112852	0.227324	0.0268326	0.0326611	0.184593	0.0427161	0.0663111	0.197007	0.368565	0.0975551	0.108406	0.151796	0	0.177332	0.463897	0.0209238	0.390242	0.353395
ELF045_25	0.526701	0.336375	1.33342	0.194466	0.334515	0.128046	0.129013	0.334515	1.00902	1.33452	0.334515	0.59436	0.685381	0.778367	0.63257	0.556195	0.542351	0.471938	0.40541	0.198477	0.297293	0.350914	0.151584	0.0737337	0.392472	0.587812	0.535978	0.441134	0.357268	0.432023	0.750727	0.197845	0.0579828	0.0962788	0.267127	0.573221	0.185843	0.436711	0.0927079	0.446808	0.518268	0.0221502	0.627236	0.177332	0	0.0988913	0.110575	0.0917052	0.195373
ELF051_310	0.559259	0.428918	1.35485	0.140798	0.4187	0.0501255	0.0523175	0.4187	1.08103	1.41499	0.4187	1.04492	1.17043	1.29378	1.10461	1.00849	0.584662	0.86415	0.770319	0.455548	0.561092	0.50525	0.235675	0.27923	0.744733	0.89383	0.982488	0.828431	0.545103	0.836838	1.26055	0.385245	0.132157	0.310997	0.550126	0.964604	0.406936	0.80824	0.237548	0.619804	0.920552	0.173251	1.10695	0.463897	0.0988913	0	0.328746	0.0561371	0.218746
ELF051_292	0.685436	0.339897	1.32791	0.462782	0.345795	0.402596	0.402748	0.345795	1.02564	1.34346	0.345795	0.205559	0.261059	0.320046	0.229873	0.190706	0.518502	0.136679	0.102914	0.0496345	0.15146	0.304748	0.254684	0.0248864	0.123688	0.358626	0.175477	0.140117	0.415986	0.120429	0.303489	0.144589	0.182906	0.032658	0.0748274	0.254643	0.0657462	0.120077	0.188632	0.432657	0.160515	0.0778516	0.230351	0.0209238	0.110575	0.328746	0	0.297481	0.318682
ELF051_255	0.507167	0.273596	1.13787	0.162865	0.293676	0.0667303	0.0680197	0.293676	0.968035	1.24801	0.293676	0.946394	1.06343	1.18239	0.999373	0.900994	0.538845	0.780012	0.691485	0.399061	0.438634	0.406346	0.215474	0.235486	0.636685	0.788303	0.886387	0.71597	0.428295	0.750977	1.14628	0.283445	0.106308	0.242758	0.470602	0.844306	0.321912	0.728175	0.19073	0.469102	0.835967	0.141702	0.999838	0.390242	0.0917052	0.0561371	0.297481	0	0.121441
ELF051_215	0.455606	0.178605	1.01667	0.342875	0.162441	0.264993	0.268599	0.162441	0.816785	0.684307	0.162441	0.83086	0.93928	1.0561	0.88675	0.782448	0.423836	0.671679	0.596179	0.330104	0.294171	0.302723	0.195271	0.260465	0.527412	0.627455	0.807334	0.588314	0.287504	0.663912	1.01914	0.183277	0.145324	0.214749	0.362619	0.710222	0.245002	0.621906	0.181665	0.300984	0.719279	0.181711	0.892085	0.353395	0.195373	0.218746	0.318682	0.121441	0
ELF051_196	0.538318	0.229639	1.05427	0.333013	0.199602	0.252973	0.257942	0.199602	0.874066	0.639049	0.199602	0.851274	0.961969	1.08156	0.910678	0.808589	0.428122	0.683217	0.605615	0.332814	0.352055	0.334033	0.183241	0.266577	0.557798	0.671921	0.829829	0.630898	0.34444	0.67973	1.04659	0.235403	0.160187	0.24233	0.379829	0.745931	0.275046	0.631239	0.195802	0.408507	0.728299	0.19013	0.91747	0.375296	0.195207	0.179706	0.314732	0.130809	0.0245369
ELF051_151	0.575927	0.222151	1.1444	0.575927	0.144402	0.522538	0.518984	0.144402	0.340681	1.00487	0.144402	0.822428	0.928183	1.04357	0.883665	0.776732	0.0912393	0.658428	0.592659	0.347815	0.299242	0.288245	0.247117	0.368175	0.536306	0.621147	0.836002	0.596867	0.298066	0.67991	1.01199	0.178209	0.283834	0.290942	0.356641	0.699958	0.281109	0.585334	0.2802	0.334841	0.698014	0.311245	0.897483	0.417176	0.36683	0.395253	0.409345	0.292077	0.169071
ELF051_120	0.708617	0.321278	1.29592	0.56576	0.295918	0.50567	0.501679	0.295918	0.975918	1.29592	0.295918	0.936034	1.06357	1.18996	1.01345	0.896821	0.510897	0.764661	0.688916	0.367148	0.284329	0.39359	0.138922	0.413379	0.679516	0.795918	0.959325	0.705028	0.0958715	0.765979	1.15962	0.24061	0.24576	0.282642	0.414658	0.851474	0.336147	0.722436	0.157526	0.171387	0.816909	0.244918	1.02467	0.454102	0.321956	0.37052	0.461032	0.309924	0.227622
ELF051_96	0.355397	0.359115	1.30559	0.784516	0.305589	0.750867	0.747138	0.305589	0.930416	1.30559	0.305589	0.981431	1.09266	1.20798	1.0472	0.936813	0.571556	0.831192	0.765851	0.510005	0.329133	0.451572	0.400175	0.559228	0.69767	0.759612	1.00641	0.715254	0.272514	0.844911	1.17499	0.299026	0.433864	0.409636	0.502407	0.861144	0.405653	0.788821	0.386664	0.209893	0.876263	0.455416	1.06071	0.560928	0.539447	0.649435	0.609992	0.505504	0.298464
ELF031_056	0.48815	0.44282	1.42382	0.102185	0.423823	0.0477505	0.0503526	0.423823	1.10382	1.42382	0.423823	0.989532	1.10204	1.2174	1.03509	0.941645	0.659972	0.828525	0.738716	0.448461	0.534443	0.497273	0.27011	0.235519	0.696727	0.871191	0.907222	0.774411	0.546374	0.782649	1.18189	0.369694	0.126045	0.283103	0.537716	0.909203	0.393675	0.778925	0.22434	0.60994	0.886082	0.148564	1.02936	0.420169	0.070715	0.0501967	0.306206	0.0667616	0.226282
ELF031_043	0.753472	0.290126	1.28125	0.670139	0.28125	0.61188	0.614378	0.28125	0.96125	1.28125	0.28125	0.346666	0.404832	0.471246	0.376057	0.320485	0.525364	0.270204	0.236001	0.168224	0.191996	0.328139	0.355537	0.153472	0.188657	0.40625	0.338812	0.240756	0.427231	0.267284	0.448241	0.180423	0.316806	0.160506	0.161498	0.336806	0.15005	0.246337	0.302455	0.430042	0.288748	0.239662	0.379507	0.162845	0.308622	0.538944	0.1807	0.443798	0.369347
ELF031_033	0.555556	0.12426	1	0.555556	0	0.510118	0.508705	0	0.68	1	0	0.700936	0.795805	0.905804	0.754929	0.64793	0.316482	0.552203	0.490079	0.270713	0.208365	0.19957	0.211988	0.288889	0.407407	0.5	0.712107	0.473395	0.239093	0.56753	0.873797	0.129566	0.235556	0.231529	0.267077	0.555556	0.1888	0.502077	0.223214	0.276343	0.584656	0.26056	0.764347	0.331728	0.334515	0.4187	0.345795	0.293676	0.162441
ELF031A_310	0.555556	0.12426	1	0.555556	0	0.510118	0.508705	0	0.68	1	0	0.700936	0.795805	0.905804	0.754929	0.64793	0.316482	0.552203	0.490079	0.270713	0.208365	0.19957	0.211988	0.288889	0.407407	0.5	0.712107	0.473395	0.239093	0.56753	0.873797	0.129566	0.235556	0.231529	0.267077	0.555556	0.1888	0.502077	0.223214	0.276343	0.584656	0.26056	0.764347	0.331728	0.334515	0.4187	0.345795	0.293676	0.162441
ELF031A_281	0.930556	0.49926	1.375	0.763889	0.375	0.885118	0.880711	0.375	0.255	1.375	0.375	1.07346	1.16562	1.27786	1.12208	1.01051	0.178324	0.913639	0.852028	0.631043	0.551619	0.532612	0.57451	0.597222	0.75463	0.875	1.07574	0.837284	0.586032	0.93615	1.24749	0.396722	0.610556	0.576983	0.616502	0.930556	0.5638	0.827757	0.582589	0.630935	0.946655	0.625549	1.12551	0.683379	0.694131	0.778481	0.711659	0.663639	0.517033
ELF031A_219	0.555556	0.12426	1	0.555556	0	0.510118	0.508705	0	0.68	1	0	0.700936	0.795805	0.905804	0.754929	0.64793	0.316482	0.552203	0.490079	0.270713	0.208365	0.19957	0.211988	0.288889	0.407407	0.5	0.712107	0.473395	0.239093	0.56753	0.873797	0.129566	0.235556	0.231529	0.267077	0.555556	0.1888	0.502077	0.223214	0.276343	0.584656	0.26056	0.764347	0.331728	0.334515	0.4187	0.345795	0.293676	0.162441
ELF031A_202	0.613349	0.507204	1.36985	0.116896	0.540063	0.00453633	0.00346731	0.540063	1.22006	1.54006	0.540063	1.18802	1.31068	1.43241	1.23744	1.13989	0.775918	1.01532	0.916923	0.595646	0.6873	0.628638	0.365356	0.341009	0.867093	1.04006	1.09066	0.953884	0.674619	0.963979	1.39414	0.490238	0.188385	0.392289	0.698526	1.09562	0.519502	0.962027	0.317989	0.723919	1.07982	0.231291	1.23094	0.5547	0.127185	0.0502037	0.415921	0.073669	0.282803
ELF031A_177	0.648525	0.570208	1.45587	0.116267	0.609099	0.0135504	0.0172011	0.609099	1.2891	1.6091	0.609099	1.24025	1.36437	1.48521	1.2886	1.19351	0.841434	1.06829	0.968316	0.645165	0.741171	0.687343	0.414396	0.371106	0.919732	1.097	1.13576	1.00507	0.734918	1.01259	1.44675	0.538474	0.214547	0.426221	0.753063	1.1539	0.563866	1.01562	0.358163	0.768506	1.13517	0.258264	1.28133	0.592772	0.141793	0.0582545	0.445478	0.0900619	0.320373
ELF031A_152	0.813928	0.524817	1.42452	0.651935	0.449442	0.589243	0.589827	0.449442	1.1282	1.44321	0.449442	1.1235	1.23104	1.34439	1.17818	1.07415	0.737805	0.970359	0.893317	0.638804	0.625023	0.607853	0.528201	0.478311	0.741239	0.884022	1.09865	0.885039	0.658241	0.960731	1.30973	0.485306	0.457791	0.5422	0.657306	0.998767	0.55413	0.915937	0.514807	0.694061	1.00725	0.502036	1.18251	0.661635	0.509506	0.538815	0.618792	0.471753	0.453631
ELF031A_123	0.533831	0.455689	1.41284	0.0788205	0.44351	0.0399107	0.0424481	0.44351	1.12167	1.44351	0.44351	1.09734	1.2166	1.33661	1.14564	1.04659	0.690853	0.927153	0.831388	0.523845	0.59576	0.542968	0.32024	0.273503	0.754122	0.886762	1.00983	0.850102	0.601941	0.882925	1.29902	0.402199	0.141643	0.335483	0.606395	0.995998	0.440777	0.873105	0.27258	0.644011	0.985976	0.19501	1.13967	0.488642	0.106256	0.0504871	0.367413	0.0665216	0.232952
ELF031A_107	0.788765	0.806654	1.75442	0.173613	0.845331	0.0576238	0.0634458	0.845331	1.52533	1.84533	0.845331	1.48209	1.6118	1.7347	1.52925	1.43527	1.06444	1.30473	1.19704	0.854546	0.991863	0.910656	0.590652	0.52028	1.14971	1.34533	1.35591	1.2466	0.984006	1.23575	1.69481	0.756893	0.344522	0.606653	0.983647	1.40089	0.776131	1.24951	0.526662	1.02399	1.37743	0.396505	1.51987	0.783129	0.239746	0.119929	0.599248	0.18893	0.491233
ELF031A_088	0.535293	0.320327	0.989811	0.140605	0.379921	0.0462562	0.052834	0.379921	1.05992	1.37992	0.379921	1.03372	1.15072	1.2738	1.08494	0.980005	0.625155	0.860233	0.769299	0.45166	0.525862	0.477881	0.225319	0.266795	0.720173	0.870306	0.960385	0.802156	0.470249	0.820209	1.23721	0.356017	0.124268	0.294492	0.539539	0.935476	0.398556	0.807121	0.194463	0.578136	0.919588	0.157162	1.07891	0.447482	0.0997035	0.0610467	0.34427	0.0486125	0.185235
ELF031A_072	0.581683	0.467488	1.41303	0.144338	0.452072	0.0612233	0.0632579	0.452072	1.13201	1.45078	0.452072	1.08461	1.21282	1.33849	1.14653	1.04965	0.616968	0.89938	0.803563	0.479524	0.594962	0.537826	0.243417	0.302561	0.788005	0.950458	1.0229	0.873762	0.564934	0.872174	1.30583	0.421579	0.154875	0.337819	0.581328	1.00752	0.441833	0.843762	0.252164	0.651744	0.956258	0.190384	1.14912	0.493909	0.112994	0.00274898	0.352218	0.0728685	0.245093
ELF031A_058	1.09522	0.676197	1.55434	1.04209	0.557619	1.03006	1.02469	0.557619	1.23747	1.55362	0.557619	1.1699	1.29641	1.4277	1.26771	1.17262	0.567107	0.962817	0.89309	0.624754	0.696438	0.689606	0.476542	0.797672	0.957384	1.05453	1.25482	1.02239	0.676074	1.04158	1.4131	0.66266	0.729079	0.722597	0.663575	1.10881	0.671958	0.905785	0.665848	0.814419	0.981387	0.731367	1.30228	0.830016	0.818915	0.682441	0.763492	0.776382	0.66866
ELF019_436	0.888889	0.303748	0.666667	0.888889	0.333333	0.775075	0.777596	0.333333	0.48	1.33333	0.333333	1.03427	1.12618	1.23816	1.08594	0.977123	0.30771	0.877545	0.817412	0.597388	0.504661	0.501823	0.533438	0.622222	0.740741	0.833333	1.03938	0.806728	0.55542	0.899474	1.20539	0.410611	0.568889	0.54668	0.58677	0.888889	0.5088	0.80253	0.552083	0.596071	0.915042	0.592195	1.09537	0.658835	0.664918	0.718873	0.672389	0.562536	0.433578
ELF019_400	0.511041	0.139756	1.01222	0.425934	0.0973291	0.351764	0.352535	0.0973291	0.590095	1.05478	0.0973291	0.776778	0.880841	0.99844	0.832429	0.716979	0.260396	0.614416	0.543744	0.270345	0.275299	0.231135	0.117865	0.252885	0.47164	0.533499	0.769978	0.540937	0.207786	0.610529	0.964777	0.143457	0.139977	0.213578	0.299869	0.624516	0.224853	0.553306	0.127819	0.349356	0.65678	0.172604	0.835467	0.336911	0.21971	0.276	0.320544	0.193328	0.127272
ELF019_365	0.577704	0.455704	1.33019	0.125245	0.473304	0.0161999	0.0198052	0.473304	1.15018	1.47265	0.473304	1.11312	1.23747	1.35966	1.16743	1.07138	0.678379	0.936582	0.840325	0.52203	0.620309	0.555849	0.298005	0.304948	0.803076	0.971269	1.03249	0.887682	0.608461	0.897118	1.32376	0.429467	0.155815	0.344973	0.622563	1.02625	0.45818	0.882192	0.275014	0.664042	0.997501	0.196765	1.16527	0.504587	0.105491	0.0148059	0.365961	0.0520075	0.240764
ELF019_342	0.662209	0.615762	1.56768	0.13089	0.637167	0.0214349	0.0252533	0.637167	1.31596	1.63596	0.637167	1.27865	1.40543	1.52762	1.32833	1.23143	0.862331	1.10408	1.00212	0.668951	0.777307	0.708028	0.42101	0.391595	0.955854	1.13687	1.17398	1.0429	0.754612	1.04603	1.48893	0.563273	0.22378	0.450344	0.783182	1.19192	0.594149	1.05012	0.369055	0.804219	1.17212	0.27004	1.32108	0.620853	0.149056	0.0595484	0.467055	0.10367	0.344204
ELF019_310	0.622942	0.543096	1.45497	0.130221	0.558893	0.0203894	0.0229282	0.558893	1.23885	1.55477	0.558893	1.19518	1.32275	1.44644	1.25051	1.15549	0.752533	1.01514	0.915643	0.589234	0.705474	0.640222	0.35074	0.351419	0.883753	1.05843	1.10771	0.973328	0.693447	0.972064	1.41053	0.50976	0.195048	0.403247	0.69848	1.11382	0.528226	0.959972	0.3281	0.750462	1.07801	0.23783	1.24852	0.566481	0.130663	0.0196295	0.41116	0.0783324	0.296424
ELF019_265	0.730604	0.732795	1.71666	0.152734	0.753249	0.0429853	0.0477845	0.753249	1.43272	1.74961	0.753249	1.39248	1.52086	1.64294	1.44037	1.34583	0.975029	1.21685	1.11151	0.774537	0.900881	0.819254	0.520714	0.462877	1.06397	1.253	1.27526	1.15644	0.89159	1.15259	1.60351	0.671001	0.291465	0.538599	0.897169	1.30847	0.695926	1.16202	0.461617	0.93205	1.28731	0.341987	1.43197	0.711979	0.198884	0.0918342	0.539927	0.151698	0.428104
ELF019_238	0.712715	0.708229	1.68917	0.147459	0.725666	0.0391032	0.0438736	0.725666	1.40296	1.72315	0.725666	1.36552	1.49316	1.61487	1.41341	1.3189	0.94759	1.1905	1.08601	0.7518	0.874192	0.791909	0.50287	0.44653	1.0378	1.22504	1.25072	1.12928	0.867308	1.12801	1.57561	0.645785	0.278069	0.519311	0.872044	1.28007	0.672723	1.13572	0.445194	0.905982	1.26017	0.328002	1.40527	0.691427	0.188865	0.0851786	0.522955	0.141901	0.410078
ELF019_206	0.681805	0.658112	1.6111	0.138681	0.679629	0.0295772	0.0349229	0.679629	1.35403	1.65865	0.679629	1.32149	1.44788	1.56914	1.36941	1.27486	0.903049	1.14737	1.04439	0.714598	0.829208	0.748829	0.473341	0.4198	0.994807	1.17893	1.21048	1.08483	0.825673	1.08781	1.52995	0.605026	0.255604	0.487115	0.83044	1.23239	0.634499	1.09284	0.417585	0.860753	1.21588	0.304779	1.36187	0.65738	0.172381	0.0736357	0.495047	0.121537	0.372042
ELF019_195	0.69256	0.646713	1.5277	0.143859	0.690035	0.0233851	0.0298678	0.690035	1.37004	1.67055	0.690035	1.32238	1.44757	1.5686	1.36972	1.27577	0.917616	1.14895	1.04668	0.719519	0.836583	0.764298	0.48123	0.422647	0.997334	1.18192	1.20937	1.08926	0.8373	1.08871	1.52945	0.619066	0.261089	0.492225	0.834815	1.23693	0.640004	1.09471	0.423751	0.874343	1.21758	0.308921	1.36215	0.66015	0.175815	0.0762821	0.496252	0.12057	0.375601
ELF019_170	0.707081	0.678849	1.618	0.14531	0.712674	0.0326186	0.0382205	0.712674	1.39263	1.70895	0.712674	1.35114	1.47905	1.601	1.39971	1.3049	0.938231	1.17646	1.07258	0.737905	0.849551	0.781086	0.488282	0.438618	1.02518	1.21153	1.2382	1.11396	0.837292	1.11467	1.56169	0.629624	0.268014	0.503541	0.856327	1.26664	0.657737	1.12262	0.429253	0.869716	1.24665	0.316254	1.39203	0.67777	0.181647	0.0810549	0.514094	0.130107	0.391327
ELF019_146	1.05666	0.629676	1.49831	1.01465	0.531919	0.984577	0.978616	0.531919	1.20856	1.41427	0.531919	1.18479	1.29592	1.43213	1.2567	1.10333	0.767684	1.00329	0.934402	0.562464	0.646446	0.634135	0.224381	0.694197	0.933257	1.02772	1.22733	0.994436	0.223143	0.985797	1.40349	0.578439	0.537222	0.631706	0.634539	1.08187	0.672988	0.94989	0.283007	0.763758	1.04602	0.503491	1.24997	0.758467	0.650006	0.815694	0.797052	0.747594	0.606528
ELF019_134	0.831956	0.409985	1.33701	0.751148	0.337006	0.719178	0.713509	0.337006	1.01701	1.33701	0.337006	0.989488	1.10605	1.23702	1.06116	0.921319	0.589693	0.817133	0.746405	0.395938	0.382793	0.440652	0.105414	0.492562	0.734313	0.837006	1.02294	0.775048	0.0464149	0.803039	1.20684	0.335853	0.330138	0.392227	0.452646	0.892562	0.437322	0.770128	0.133002	0.389478	0.865216	0.307068	1.06046	0.539234	0.432727	0.578635	0.581289	0.49148	0.376468
ELF019_119	0.725624	0.213742	1.26531	0.630385	0.265306	0.572738	0.574085	0.265306	0.773878	1.26531	0.265306	0.955634	1.05603	1.16775	1.00827	0.904363	0.559232	0.801827	0.731211	0.492502	0.457798	0.420254	0.401918	0.458957	0.656841	0.765306	0.946245	0.722828	0.489822	0.805256	1.13312	0.344452	0.386576	0.420212	0.512653	0.535147	0.414106	0.750862	0.403061	0.527072	0.83919	0.415512	1.01383	0.534135	0.453196	0.501802	0.5179	0.410656	0.340283
ELF019_94	1.46263	0.889274	1.91332	1.45452	0.914252	1.41025	1.40876	0.914252	1.59425	1.91425	0.914252	0.0187615	0.00532723	0.000522804	0.00941759	0.0279019	1.0773	0.0598964	0.0864733	0.293949	0.39127	0.761698	0.922536	0.429908	0.152003	0.457771	0.02479	0.100994	0.938353	0.0582284	0.000805659	0.551557	0.88364	0.40849	0.247726	0.195124	0.372402	0.0806639	0.795814	0.894978	0.0508142	0.640152	0.00958719	0.233568	0.78187	1.30651	0.325549	1.19061	1.06465
ELF019_70	0.725106	0.284761	1.22837	0.646674	0.228374	0.614811	0.61128	0.228374	0.908374	1.22837	0.228374	0.362187	0.430409	0.514109	0.401329	0.316932	0.448106	0.260332	0.221762	0.0688888	0.138419	0.23022	0.105036	0.152557	0.230552	0.404844	0.37524	0.254383	0.138685	0.249498	0.494225	0.126105	0.21687	0.112042	0.0937657	0.352557	0.11835	0.232751	0.0834157	0.370863	0.286141	0.124858	0.399804	0.138723	0.237711	0.493377	0.177133	0.416333	0.322387
ELF019_33	0.621315	0.19002	1.161	0.462585	0.160998	0.470057	0.467414	0.160998	0.74576	1.161	0.160998	0.361462	0.433063	0.518203	0.399347	0.315583	0.348407	0.254436	0.210033	0.0595565	0.095742	0.204723	0.103229	0.0816327	0.192744	0.375283	0.357521	0.229631	0.15495	0.245346	0.495777	0.0683411	0.148934	0.0574617	0.0802487	0.303855	0.0774168	0.222355	0.0695862	0.291568	0.28333	0.0777369	0.397086	0.0959532	0.159982	0.372748	0.119768	0.294131	0.221259
ELF044_195	0.707881	0.256774	1.17929	0.592586	0.265761	0.535466	0.534788	0.265761	0.945761	1.26576	0.265761	0.181109	0.236131	0.29916	0.209384	0.156101	0.47665	0.112393	0.0835825	0.0145497	0.0571994	0.245703	0.192892	0.0596247	0.0951431	0.304116	0.17636	0.099175	0.230796	0.100719	0.281577	0.0816014	0.197086	0.0200873	0.0239333	0.213228	0.0366534	0.0971676	0.129212	0.291599	0.13589	0.0863995	0.209754	0.0171843	0.174193	0.452153	0.0498364	0.364018	0.298084
ELF044_175	1.01324	0.521384	1.51516	0.927038	0.532402	0.883663	0.88238	0.532402	1.2124	1.5324	0.532402	0.0258441	0.0454863	0.0738555	0.0336447	0.0161642	0.715263	0.0125722	0.0110127	0.0817533	0.168654	0.427012	0.486937	0.161521	0.0509204	0.308264	0.021547	0.0297433	0.534426	0.00305977	0.0652983	0.253245	0.461061	0.142144	0.0663014	0.133934	0.136719	0.0150967	0.389237	0.555402	0.0196164	0.282763	0.0325796	0.0494373	0.390799	0.791738	0.104782	0.699772	0.618186
ELF044_137	1.5257	0.944213	1.97246	1.52223	0.972463	1.47771	1.47628	0.972463	1.65246	1.97246	0.972463	0.0277983	0.0105288	0.00165939	0.0163198	0.0393679	1.13256	0.075578	0.105376	0.329082	0.428265	0.813156	0.984251	0.469686	0.174238	0.486352	0.0342236	0.119547	0.99751	0.0743267	0.00297424	0.597331	0.941584	0.448421	0.279786	0.213204	0.410291	0.0986602	0.853059	0.945058	0.0648317	0.690108	0.0165462	0.26404	0.834596	1.37342	0.359481	1.2557	1.12674
ELF044_115	0.943963	0.451365	1.41577	0.902365	0.419059	0.864365	0.862285	0.419059	1.09906	1.41577	0.419059	0.203007	0.237276	0.286198	0.220438	0.164685	0.631272	0.156004	0.141735	0.153014	0.203179	0.148478	0.468149	0.233509	0.155056	0.373903	0.208058	0.155034	0.504144	0.159932	0.270762	0.228009	0.461292	0.200894	0.122897	0.24774	0.164641	0.145396	0.400198	0.522385	0.164502	0.324021	0.225025	0.147639	0.433027	0.76789	0.194239	0.659649	0.549961
ELF044_90	1.28555	0.732698	1.74073	1.2571	0.747172	1.22022	1.21841	0.747172	1.42717	1.74717	0.747172	0.0045761	0.00299892	0.0110939	0.00205116	0.00609793	0.919785	0.0248203	0.0413877	0.197589	0.289176	0.620829	0.742121	0.317757	0.0951766	0.384853	0.00996707	0.0580242	0.763582	0.0218547	0.00833602	0.42361	0.719603	0.298998	0.161083	0.152969	0.270529	0.038468	0.629497	0.753098	0.0205944	0.499179	0.00167536	0.153127	0.633916	1.11644	0.235837	1.00582	0.88712
ELF044_50	0.763889	0.383876	1.375	0.597222	0.375	0.53469	0.535117	0.375	1.055	1.375	0.375	0.224451	0.271175	0.324187	0.243367	0.20616	0.586219	0.167266	0.139607	0.112317	0.186539	0.358952	0.361498	0.0972222	0.143519	0.375	0.196198	0.156728	0.48144	0.151546	0.307698	0.171232	0.277222	0.0928926	0.120338	0.263889	0.1038	0.153437	0.280134	0.472772	0.188595	0.169051	0.243153	0.0716379	0.216383	0.476328	0.0751888	0.408434	0.394584
ELF044_25	1.55556	0.970414	2	1.55556	1	1.51012	1.50871	1	1.68	2	1	0.0326194	0.0135824	0.00286332	0.0201993	0.0454458	1.15859	0.0834336	0.114742	0.345619	0.44646	0.840595	1.01234	0.488889	0.185185	0.5	0.0393802	0.128951	1.02481	0.0822819	0.00468737	0.619762	0.968889	0.467893	0.29521	0.222222	0.4288	0.107519	0.879464	0.970221	0.0719151	0.713782	0.0204021	0.279026	0.85979	1.40534	0.376122	1.28696	1.15661
ELF044A_097	1.25358	0.717535	1.73026	1.2004	0.736707	1.16658	1.16502	0.736707	1.41574	1.73671	0.736707	0.00453306	0.00416749	0.0126237	0.00132189	0.00652638	0.909863	0.0233901	0.0379497	0.192532	0.283867	0.609602	0.735495	0.296507	0.0904842	0.38014	0.00360931	0.053553	0.770354	0.0189088	0.00927108	0.411232	0.693348	0.28121	0.158146	0.149636	0.256692	0.0366648	0.618906	0.742054	0.0205341	0.477698	0.000656722	0.138928	0.601287	1.07089	0.21379	0.964694	0.860432
ELF042_350	0.874521	0.428905	1.41471	0.707854	0.435986	0.697331	0.696093	0.435986	1.11599	1.43599	0.435986	0.0710388	0.100199	0.138099	0.0810045	0.05666	0.630898	0.039824	0.0267654	0.0649612	0.141692	0.348619	0.420474	0.0890596	0.049363	0.303008	0.0515995	0.0435717	0.50469	0.0291787	0.126259	0.189874	0.357712	0.0887193	0.0562222	0.151116	0.0914884	0.0363225	0.324557	0.494353	0.05129	0.206966	0.0790417	0.020553	0.284074	0.623519	0.0525599	0.540316	0.491656
ELF042_250	0.620617	0.225976	1.16779	0.47854	0.194023	0.446722	0.444887	0.194023	0.8714	1.19402	0.194023	0.286097	0.350843	0.42734	0.318059	0.248205	0.417839	0.193392	0.153504	0.0346709	0.0832102	0.184689	0.131536	0.0527481	0.150429	0.339925	0.275609	0.177473	0.210985	0.180405	0.406435	0.0780085	0.1463	0.0364015	0.0516917	0.277448	0.0482657	0.168041	0.086529	0.299205	0.219435	0.0626278	0.317381	0.0550722	0.135092	0.362854	0.0681743	0.291546	0.241433
ELF042_151	1.06694	0.570119	1.57064	0.975583	0.58546	0.937552	0.936316	0.58546	1.26398	1.58546	0.58546	0.0163187	0.0297086	0.0510026	0.0191291	0.0121798	0.768803	0.0136157	0.0160394	0.118243	0.20229	0.479806	0.577351	0.18941	0.0562414	0.329904	0.00773532	0.0320233	0.631318	0.00592146	0.0436276	0.295562	0.525213	0.176349	0.0959201	0.131139	0.16226	0.0193452	0.469702	0.609422	0.0176951	0.338673	0.0189079	0.0686168	0.441538	0.853034	0.124268	0.755607	0.677238
ELF042_065	0.685457	0.305539	1.27617	0.488094	0.300895	0.454996	0.454095	0.300895	0.9804	1.29966	0.300895	0.187888	0.239229	0.299059	0.209498	0.160527	0.506307	0.121078	0.0895336	0.0345216	0.116241	0.235333	0.236731	0.0228287	0.0973972	0.324999	0.161856	0.113907	0.351134	0.103235	0.281294	0.111306	0.186966	0.0265468	0.0494479	0.22357	0.050486	0.104801	0.162268	0.397828	0.143501	0.0775353	0.207003	0.0120517	0.131272	0.389879	0.015896	0.326623	0.313228
ELF041_295	0.858147	0.377101	1.31254	0.788495	0.372243	0.722391	0.720281	0.372243	1.05224	1.37224	0.372243	0.0929814	0.12608	0.168258	0.108183	0.0775574	0.583855	0.056515	0.043751	0.0676862	0.123607	0.332381	0.403264	0.119839	0.0516241	0.290154	0.0858432	0.0549252	0.463225	0.0522378	0.155082	0.175207	0.365013	0.0990232	0.0542151	0.151679	0.070894	0.0488554	0.321803	0.457907	0.0678496	0.227237	0.108443	0.0422763	0.319125	0.646753	0.0828398	0.547779	0.46715
ELF041_180	0.75463	0.363711	1.36197	0.525369	0.36197	0.528661	0.527055	0.36197	1.04197	1.36197	0.36197	0.144063	0.186533	0.237352	0.159771	0.123697	0.56283	0.0911754	0.0656072	0.048018	0.128692	0.310572	0.311725	0.0360781	0.0810923	0.323509	0.115008	0.0869995	0.422561	0.0741598	0.222241	0.144096	0.246395	0.0452065	0.0569907	0.199577	0.0680555	0.0807338	0.223759	0.440604	0.109896	0.120201	0.155674	0.00932059	0.175965	0.463267	0.0217036	0.39733	0.380723
ELF041_110	1.11338	0.623414	1.62389	1.04732	0.641912	0.994488	0.99197	0.641912	1.32191	1.64191	0.641912	0.0124586	0.0209668	0.0369854	0.0130068	0.0119061	0.821125	0.0183745	0.0247509	0.148018	0.237807	0.540678	0.640157	0.21969	0.0643346	0.349119	0.00340537	0.0405325	0.699446	0.0108261	0.0309682	0.339045	0.57957	0.212016	0.12251	0.140411	0.197199	0.0266879	0.528294	0.664532	0.0203257	0.385158	0.0126369	0.0917309	0.488723	0.914649	0.148693	0.817473	0.737061
ELF041_087	0.511597	0.259789	1.16437	0.178264	0.264375	0.148424	0.148957	0.264375	0.944375	1.26438	0.264375	0.535051	0.618846	0.709077	0.569391	0.494448	0.491383	0.415727	0.352766	0.174101	0.247145	0.258875	0.177521	0.0532639	0.331505	0.526875	0.478301	0.37902	0.369221	0.386756	0.681562	0.150803	0.0749306	0.0776085	0.22346	0.503264	0.142675	0.381715	0.117388	0.412402	0.456161	0.0383133	0.564621	0.145853	0.0239176	0.126811	0.090147	0.0962645	0.168653
ELF040A_487	0.597222	0.383876	1.375	0.0972222	0.375	0.184263	0.183534	0.375	1.055	1.375	0.375	0.622966	0.704508	0.793304	0.651744	0.585042	0.599377	0.502913	0.436186	0.264626	0.341301	0.405572	0.280392	0.0972222	0.421296	0.625	0.548471	0.462284	0.501848	0.469443	0.767122	0.23986	0.143889	0.149711	0.319826	0.597222	0.2338	0.471464	0.204241	0.523792	0.543379	0.104799	0.641077	0.212398	0.0691305	0.165266	0.14945	0.152222	0.254642
ELF040A_350	1.43137	0.875901	1.90439	1.39804	0.904388	1.35443	1.35325	0.904388	1.58439	1.90439	0.904388	0.0174173	0.00559983	0.0015578	0.00785801	0.0271184	1.06636	0.0567804	0.081197	0.28392	0.385655	0.756538	0.905018	0.403753	0.145922	0.454388	0.017729	0.0969098	0.935318	0.0525478	0.00137131	0.538995	0.852324	0.388319	0.24198	0.193277	0.359188	0.0769941	0.775529	0.885541	0.0492469	0.612262	0.00743934	0.217246	0.743809	1.25705	0.301222	1.14766	1.03742
ELF040A_298	0.935328	0.460119	1.44108	0.785903	0.464064	0.794007	0.792273	0.464064	1.14177	1.46406	0.464064	0.0514517	0.0746664	0.108594	0.0590962	0.0388879	0.659856	0.0271524	0.0190427	0.0762104	0.150353	0.383913	0.46223	0.122301	0.0483551	0.303144	0.0380314	0.0347132	0.528397	0.0197385	0.0984378	0.21477	0.416095	0.117798	0.0608584	0.134562	0.111025	0.0262704	0.365439	0.524479	0.0349599	0.253527	0.0565934	0.0357143	0.345364	0.711545	0.0819585	0.619207	0.548223
ELF040A_208	0.787879	0.330166	1.25253	0.686869	0.313131	0.645575	0.643337	0.313131	0.993131	1.31313	0.313131	0.181784	0.230103	0.292287	0.207729	0.151726	0.514781	0.11489	0.0899573	0.0240891	0.118418	0.288783	0.200698	0.0969697	0.114478	0.328283	0.183365	0.1239	0.260171	0.101287	0.277044	0.145608	0.257778	0.0763407	0.0395589	0.222222	0.0861737	0.0987578	0.14917	0.426828	0.13364	0.129284	0.204247	0.0521409	0.23386	0.543242	0.0906624	0.461621	0.393056
ELF040A_192	0.997156	0.487443	1.45356	0.988187	0.453558	0.950951	0.948838	0.453558	1.12818	1.45356	0.453558	0.231593	0.264576	0.308308	0.24786	0.206856	0.681888	0.193268	0.182266	0.210379	0.225451	0.440954	0.550265	0.293419	0.100129	0.0163386	0.240472	0.106923	0.568349	0.199614	0.292045	0.268167	0.432014	0.248112	0.140772	0.264719	0.174197	0.177303	0.467131	0.549614	0.200631	0.391151	0.254354	0.193484	0.508913	0.83944	0.256373	0.731851	0.581955
ELF040A_112	0.609275	0.254902	1.23554	0.336547	0.235537	0.356377	0.351288	0.235537	0.915537	1.23554	0.235537	0.30506	0.36912	0.442545	0.332684	0.271949	0.458718	0.215157	0.171079	0.0679908	0.114898	0.21684	0.193595	0.0274564	0.168197	0.371901	0.272851	0.18772	0.301161	0.198849	0.420853	0.0834628	0.137759	0.0257438	0.0885245	0.306244	0.0607008	0.193087	0.125959	0.332845	0.243253	0.0577017	0.328918	0.0464937	0.0974749	0.301838	0.0438308	0.239024	0.230472
ELF040A_095	1.28275	0.738474	1.74507	1.22655	0.760397	1.19827	1.1968	0.760397	1.4404	1.7604	0.760397	0.00579274	0.00326844	0.00974437	0.00130724	0.0094076	0.932999	0.0277434	0.0438796	0.20714	0.297291	0.637752	0.764068	0.314165	0.0992645	0.390665	0.0049321	0.0586111	0.795917	0.023902	0.00700524	0.429892	0.720601	0.298021	0.170883	0.15631	0.272569	0.0423235	0.645181	0.761973	0.0239865	0.501031	0.000502292	0.150838	0.626456	1.10309	0.228673	0.994221	0.887182
ELF039_485	1.19544	0.618401	1.53463	1.12527	0.639889	1.13921	1.13788	0.639889	1.31989	1.63989	0.639889	1.34004	1.43055	1.54415	1.39169	1.2839	0.956371	1.18638	1.12381	0.905477	0.837394	0.831116	0.848687	0.914743	0.947881	1.08726	1.34626	1.09808	0.874686	1.20471	1.51231	0.757071	0.86141	0.864241	0.896736	1.19544	0.790794	1.13856	0.85394	0.915158	1.21934	0.894395	1.39804	0.961786	0.967984	1.05042	0.980773	0.88415	0.789441
ELF039_460	0.735844	0.302519	1.24585	0.56045	0.296934	0.555794	0.553965	0.296934	0.976934	1.29183	0.296934	0.159991	0.207607	0.266806	0.182276	0.132969	0.50291	0.0954496	0.068408	0.0183174	0.0911611	0.266321	0.225611	0.0470405	0.0845032	0.305235	0.146856	0.0919553	0.30046	0.0820083	0.250917	0.110621	0.222741	0.0368921	0.0287885	0.200297	0.0545719	0.0814149	0.157338	0.383583	0.115074	0.101413	0.178649	0.0142311	0.182561	0.472164	0.0419238	0.394888	0.342846
ELF039_415	0.610425	0.244493	1.17703	0.380441	0.23076	0.371322	0.369783	0.23076	0.909901	1.22861	0.23076	0.335131	0.404643	0.485359	0.368522	0.296588	0.444892	0.23534	0.189674	0.047147	0.123754	0.237226	0.102414	0.0360382	0.192887	0.391158	0.313504	0.220724	0.206771	0.213894	0.464076	0.0938025	0.111166	0.031597	0.083199	0.334946	0.0751648	0.209525	0.0527046	0.34545	0.266269	0.0289502	0.3633	0.0622178	0.0855021	0.295608	0.0627205	0.240481	0.226684
ELF039_384	0.632483	0.233286	1.14606	0.452236	0.190508	0.457004	0.45397	0.190508	0.869026	1.19051	0.190508	0.445752	0.524008	0.618	0.488013	0.394177	0.418393	0.326181	0.275686	0.0848758	0.146433	0.214371	0.0589025	0.108532	0.266228	0.438656	0.442413	0.30773	0.12414	0.31063	0.594865	0.109325	0.139643	0.09106	0.120595	0.41273	0.123011	0.293668	0.0360763	0.339564	0.35791	0.0718284	0.483343	0.142906	0.155291	0.356127	0.159317	0.289885	0.234192
ELF039_355	0.671754	0.251433	1.17886	0.507309	0.224198	0.504082	0.50139	0.224198	0.903665	1.2242	0.224198	0.301801	0.366636	0.445652	0.336118	0.261321	0.439943	0.206326	0.166942	0.0354294	0.104489	0.229884	0.106964	0.0730871	0.172569	0.366198	0.297766	0.19749	0.170057	0.19185	0.426139	0.0972148	0.165265	0.0542968	0.0613963	0.303309	0.0793449	0.182093	0.0672101	0.341929	0.23264	0.0708523	0.331987	0.0729677	0.159323	0.404992	0.0979215	0.333707	0.274289
ELF039_341	0.825017	0.322263	1.30771	0.775837	0.307713	0.734602	0.733133	0.307713	0.758205	1.30771	0.307713	0.14142	0.179923	0.229429	0.160402	0.118865	0.398569	0.0906036	0.0735886	0.0742812	0.102339	0.286449	0.368302	0.139771	0.0757761	0.283123	0.142473	0.0782847	0.406542	0.0930922	0.214469	0.132875	0.348733	0.106231	0.0522962	0.141957	0.0784802	0.0684046	0.303285	0.413765	0.104128	0.23187	0.16367	0.0654736	0.330455	0.639839	0.112652	0.533349	0.427856
ELF039_321	1.13302	0.605819	1.60124	1.07547	0.613487	1.04753	1.0455	0.613487	1.29337	1.61243	0.613487	0.0105348	0.0203178	0.0407614	0.0141043	0.00430802	0.792632	0.0104805	0.0172604	0.123075	0.213096	0.50493	0.584473	0.229914	0.0657718	0.337053	0.0135081	0.0370198	0.615143	0.00502155	0.0351283	0.322362	0.576087	0.210157	0.0982785	0.1342	0.191971	0.0176591	0.483994	0.639856	0.0117636	0.376855	0.0127557	0.0926156	0.502986	0.944827	0.164741	0.842273	0.735735
ELF039_275	1.2534	0.706582	1.71865	1.22405	0.720764	1.18275	1.1811	0.720764	1.40058	1.72076	0.720764	0.00449961	0.00513261	0.0150449	0.00288208	0.00379709	0.895521	0.0216565	0.0365175	0.18636	0.271766	0.572634	0.721695	0.304124	0.0897553	0.374112	0.00891078	0.0514556	0.742501	0.0191068	0.0113533	0.399876	0.69285	0.279765	0.149357	0.14755	0.250903	0.0343706	0.609337	0.720942	0.0187066	0.47754	0.00337517	0.140302	0.608799	1.0816	0.219893	0.970708	0.854546
ELF039_250	1.02178	0.517622	1.5062	0.947637	0.514931	0.92186	0.91949	0.514931	1.19467	1.51456	0.514931	0.0404307	0.0613828	0.0941845	0.0508162	0.0263037	0.697325	0.0206512	0.0184917	0.0714779	0.167951	0.427004	0.444257	0.172603	0.0634549	0.319145	0.0441556	0.0449055	0.482383	0.0117539	0.0861551	0.25495	0.464498	0.153485	0.0604205	0.142463	0.14669	0.0213205	0.358941	0.56495	0.027027	0.282629	0.048161	0.0622735	0.405563	0.814615	0.126101	0.722656	0.625473
ELF039_225	0.984232	0.509591	1.50888	0.887527	0.517214	0.840008	0.838913	0.517214	1.19677	1.5167	0.517214	0.0326242	0.0536506	0.0831841	0.0402952	0.0218259	0.701284	0.0168116	0.013131	0.0800787	0.17215	0.403314	0.479927	0.143985	0.0494296	0.314644	0.0239039	0.0344632	0.54531	0.00642287	0.0739773	0.245788	0.442463	0.133804	0.0667503	0.135273	0.129025	0.0178443	0.382699	0.559368	0.0243861	0.268288	0.0393717	0.0437056	0.366612	0.753879	0.0900586	0.666393	0.597656
ELF039_175	1.20523	0.677816	1.68594	1.15566	0.694797	1.10989	1.10862	0.694797	1.3748	1.69467	0.694797	0.00461789	0.0083087	0.0207294	0.0038807	0.00355315	0.868434	0.0172555	0.0289337	0.166248	0.259866	0.559123	0.680594	0.269296	0.0807126	0.365388	0.00409023	0.0467709	0.71831	0.0116346	0.0162947	0.377782	0.644799	0.251316	0.136002	0.144474	0.230173	0.0282682	0.569008	0.704489	0.0164479	0.435385	0.00362729	0.118809	0.556934	1.01413	0.189202	0.911153	0.811697
ELF039_145	0.935663	0.44507	1.41335	0.828379	0.44626	0.81335	0.811244	0.44626	1.12605	1.44626	0.44626	0.0518662	0.0782603	0.11607	0.0639007	0.0360346	0.638076	0.0230121	0.0150482	0.0513652	0.132267	0.375848	0.399273	0.126545	0.0485256	0.296388	0.0488741	0.0361185	0.445858	0.0145077	0.106006	0.203266	0.397599	0.110287	0.0415741	0.137719	0.106936	0.0208001	0.313917	0.499666	0.0321921	0.232607	0.0614366	0.0345661	0.341288	0.717651	0.0891276	0.625006	0.539218
ELF039_105	1.29046	0.742014	1.75343	1.26267	0.758589	1.21846	1.21698	0.758589	1.43859	1.75859	0.758589	0.00599144	0.00372474	0.0107819	0.00260857	0.00655899	0.929925	0.0276282	0.0445915	0.205595	0.298243	0.601915	0.758817	0.324277	0.100376	0.390083	0.00958576	0.060916	0.785083	0.0247412	0.00780855	0.429622	0.726165	0.303357	0.167606	0.156136	0.273699	0.0416424	0.643829	0.762446	0.0234474	0.505353	0.00289015	0.156316	0.636685	1.11795	0.235805	1.00827	0.894211
ELF039_75	0.674635	0.648305	1.65347	0.134952	0.653471	0.0397245	0.0432371	0.653471	1.33347	1.64553	0.653471	1.25253	1.37753	1.49911	1.30151	1.20261	0.871164	1.07978	0.979219	0.643587	0.777179	0.709517	0.387726	0.374635	0.942712	1.12966	1.14956	1.03083	0.726889	1.01703	1.46159	0.569995	0.213365	0.44171	0.763523	1.17728	0.593064	1.02653	0.33617	0.82834	1.14732	0.247199	1.29251	0.604516	0.132256	0.0641516	0.452551	0.117773	0.363415
ELF039_50	0.508926	0.200438	1.12881	0.280856	0.18144	0.206628	0.207457	0.18144	0.819335	1.18144	0.18144	0.543659	0.633775	0.72966	0.585951	0.498217	0.395429	0.417423	0.355304	0.154335	0.195152	0.226919	0.11995	0.0808556	0.302298	0.418283	0.509337	0.354836	0.255254	0.396204	0.700319	0.0973837	0.0380486	0.0708641	0.188052	0.491382	0.109188	0.37641	0.0772346	0.317612	0.459147	0.0383257	0.586472	0.154859	0.0534917	0.156972	0.120221	0.110301	0.127831
ELF039_25	0.953778	0.554361	1.43426	0.989814	0.434259	0.939294	0.935704	0.434259	0.0764207	1.43426	0.434259	1.12897	1.22624	1.3374	1.18381	1.07145	0.0562171	0.968012	0.910836	0.686447	0.625034	0.56226	0.621532	0.723147	0.831155	0.893718	1.14612	0.892639	0.645704	0.997843	1.30622	0.443527	0.651796	0.637778	0.672442	0.989814	0.608464	0.867802	0.655482	0.68192	1.00667	0.692339	1.19767	0.756358	0.762151	0.816591	0.770922	0.717697	0.567702
ELF054_356	0.555556	0.12426	1	0.555556	0	0.510118	0.508705	0	0.68	1	0	0.700936	0.795805	0.905804	0.754929	0.64793	0.316482	0.552203	0.490079	0.270713	0.208365	0.19957	0.211988	0.288889	0.407407	0.5	0.712107	0.473395	0.239093	0.56753	0.873797	0.129566	0.235556	0.231529	0.267077	0.555556	0.1888	0.502077	0.223214	0.276343	0.584656	0.26056	0.764347	0.331728	0.334515	0.4187	0.345795	0.293676	0.162441
ELF054_330	0.888889	0.970414	2	0.222222	1	0.108408	0.114351	1	1.68	2	1	1.63163	1.76469	1.88816	1.67814	1.58582	1.21122	1.45252	1.34066	0.988565	1.14487	1.05505	0.709314	0.622222	1.2963	1.5	1.49393	1.39562	1.13705	1.37586	1.84762	0.894271	0.435556	0.722438	1.12897	1.55556	0.9088	1.39663	0.638393	1.1743	1.52849	0.490993	1.66746	0.904777	0.312537	0.176681	0.702716	0.267484	0.608505
ELF054_315	0.888889	0.970414	2	0.222222	1	0.108408	0.114351	1	1.68	2	1	1.63163	1.76469	1.88816	1.67814	1.58582	1.21122	1.45252	1.34066	0.988565	1.14487	1.05505	0.709314	0.622222	1.2963	1.5	1.49393	1.39562	1.13705	1.37586	1.84762	0.894271	0.435556	0.722438	1.12897	1.55556	0.9088	1.39663	0.638393	1.1743	1.52849	0.490993	1.66746	0.904777	0.312537	0.176681	0.702716	0.267484	0.608505
ELF054_291	0.638889	0.297337	1.25	0.305556	0.25	0.392596	0.399424	0.25	0.93	1.25	0.25	0.91752	1.02284	1.14698	0.970897	0.851346	0.51385	0.744475	0.664922	0.364033	0.398841	0.376143	0.161631	0.305556	0.62963	0.75	0.893926	0.690062	0.278634	0.727727	1.11594	0.281526	0.218889	0.308802	0.418612	0.805556	0.3588	0.693403	0.160714	0.495731	0.787594	0.222064	0.962444	0.429627	0.258966	0.324045	0.408587	0.278061	0.262295
ELF054_268	1.00879	0.474928	1.40561	0.961168	0.477041	0.929771	0.929043	0.477041	1.15704	1.47704	0.477041	0.0425456	0.0608878	0.0900932	0.0499701	0.0326907	0.682621	0.0270359	0.0258187	0.107794	0.149124	0.424529	0.532675	0.194501	0.0352419	0.227041	0.0440184	0.0194835	0.559793	0.0285428	0.0804567	0.24106	0.484025	0.167011	0.0672819	0.127834	0.130127	0.0264936	0.44021	0.507028	0.0307552	0.334408	0.0520647	0.0738979	0.449193	0.836774	0.139544	0.717133	0.603663
ELF054_182	1.41781	0.843745	1.84711	1.38751	0.869835	1.36169	1.36025	0.869835	1.54983	1.86983	0.869835	0.0151903	0.00373702	0.00177557	0.00648645	0.0227057	1.03799	0.0511462	0.0751581	0.274031	0.364275	0.731939	0.889147	0.401148	0.134565	0.426653	0.0190289	0.0857803	0.906817	0.0503511	0.00130695	0.518117	0.844784	0.381942	0.227065	0.182966	0.345907	0.0703112	0.763402	0.859536	0.0427639	0.610423	0.00607508	0.213085	0.748693	1.26027	0.303499	1.14355	1.01757
ELF054_140	0.765432	0.356929	1.28395	0.54321	0.395062	0.50442	0.505611	0.395062	1.07506	1.39506	0.395062	0.147153	0.189879	0.237794	0.162401	0.132709	0.594585	0.0993155	0.0747599	0.065275	0.134291	0.348063	0.343631	0.0469136	0.0925926	0.339506	0.113735	0.0912963	0.450198	0.0806386	0.22232	0.156436	0.25284	0.0442674	0.074756	0.209877	0.0749728	0.091016	0.246748	0.424239	0.120527	0.12656	0.159793	0.0119427	0.174632	0.456177	0.0201037	0.385029	0.378364
ELF054_058	1.37926	0.811645	1.81411	1.35768	0.835697	1.3179	1.31668	0.835697	1.5157	1.82131	0.835697	0.0106697	0.00194122	0.00226104	0.00357278	0.0175652	1.00564	0.0431439	0.065281	0.254166	0.344964	0.703459	0.852991	0.379262	0.1236	0.418431	0.01458	0.0779569	0.873296	0.0417417	0.0010118	0.492981	0.8113	0.358364	0.210393	0.173027	0.322914	0.0608196	0.730626	0.830363	0.0361282	0.580689	0.003693	0.195986	0.716326	1.21816	0.282919	1.10118	0.977121
ELF034_219	1.05556	0.393491	0.5	1.05556	0.5	0.907554	0.919741	0.5	1.18	1.5	0.5	1.19846	1.29136	1.40286	1.25318	1.14793	0.790166	1.04589	0.985579	0.766343	0.700428	0.694908	0.701293	0.788889	0.907407	1	1.20302	0.895617	0.73144	1.06545	1.36856	0.511918	0.602222	0.722438	0.746617	1.05556	0.6288	0.996975	0.716518	0.776343	1.0818	0.757284	1.26089	0.813716	0.833966	0.878611	0.835298	0.7151	0.580808
ELF034_202	0.535822	0.55786	1.4336	0.135822	0.5936	0.0220082	0.0272669	0.5936	1.2736	1.5936	0.5936	1.23949	1.36333	1.48552	1.28849	1.19035	0.825871	1.06515	0.965371	0.636847	0.748631	0.677179	0.395035	0.370489	0.916563	1.0936	1.13807	1.007	0.725958	1.00941	1.44708	0.541205	0.210489	0.431311	0.746508	1.14916	0.568	1.01037	0.346814	0.792392	1.13145	0.255019	1.28155	0.595615	0.139104	0.0580609	0.445865	0.085288	0.307994
ELF034_185	1.05556	0.470414	1.5	1.05556	0.5	0.967383	0.994163	0.5	1.18	1.5	0.5	1.20094	1.2958	1.4058	1.25493	1.14793	0.816482	1.0522	0.989179	0.770088	0.708365	0.697239	0.711988	0.788889	0.907407	1	1.21211	0.96784	0.739093	1.06709	1.36856	0.629566	0.735556	0.726983	0.764519	1.05556	0.6888	1.00038	0.723214	0.766139	1.08414	0.759832	1.26435	0.829727	0.834515	0.916473	0.843851	0.792333	0.659525
ELF034_177	0.666667	0.52597	1.55556	0.222222	0.555556	0.1312	0.127848	0.555556	1.23556	1.55556	0.555556	1.21029	1.33062	1.4496	1.25929	1.16208	0.801862	1.0413	0.946025	0.63817	0.721592	0.658777	0.432427	0.4	0.888889	1.05556	1.12221	0.977099	0.726621	0.995304	1.4119	0.528258	0.257778	0.447691	0.730561	1.11111	0.557689	0.987337	0.388889	0.763872	1.10277	0.303071	1.25531	0.602205	0.208752	0.143026	0.471076	0.0943624	0.307889
ELF034_157	0.555556	0.12426	1	0.555556	0	0.510118	0.508705	0	0.68	1	0	0.700936	0.795805	0.905804	0.754929	0.64793	0.316482	0.552203	0.490079	0.270713	0.208365	0.19957	0.211988	0.288889	0.407407	0.5	0.712107	0.473395	0.239093	0.56753	0.873797	0.129566	0.235556	0.231529	0.267077	0.555556	0.1888	0.502077	0.223214	0.276343	0.584656	0.26056	0.764347	0.331728	0.334515	0.4187	0.345795	0.293676	0.162441
ELF034_132	0.555556	0.12426	1	0.555556	0	0.510118	0.508705	0	0.68	1	0	0.700936	0.795805	0.905804	0.754929	0.64793	0.316482	0.552203	0.490079	0.270713	0.208365	0.19957	0.211988	0.288889	0.407407	0.5	0.712107	0.473395	0.239093	0.56753	0.873797	0.129566	0.235556	0.231529	0.267077	0.555556	0.1888	0.502077	0.223214	0.276343	0.584656	0.26056	0.764347	0.331728	0.334515	0.4187	0.345795	0.293676	0.162441
ELF034_094	0.555556	0.12426	1	0.555556	0	0.510118	0.508705	0	0.68	1	0	0.700936	0.795805	0.905804	0.754929	0.64793	0.316482	0.552203	0.490079	0.270713	0.208365	0.19957	0.211988	0.288889	0.407407	0.5	0.712107	0.473395	0.239093	0.56753	0.873797	0.129566	0.235556	0.231529	0.267077	0.555556	0.1888	0.502077	0.223214	0.276343	0.584656	0.26056	0.764347	0.331728	0.334515	0.4187	0.345795	0.293676	0.162441
ELF034_079	0.555556	0.12426	1	0.555556	0	0.510118	0.508705	0	0.68	1	0	0.700936	0.795805	0.905804	0.754929	0.64793	0.316482	0.552203	0.490079	0.270713	0.208365	0.19957	0.211988	0.288889	0.407407	0.5	0.712107	0.473395	0.239093	0.56753	0.873797	0.129566	0.235556	0.231529	0.267077	0.555556	0.1888	0.502077	0.223214	0.276343	0.584656	0.26056	0.764347	0.331728	0.334515	0.4187	0.345795	0.293676	0.162441
ELF034_061	1.55556	1.12426	2	1.55556	1	1.51012	1.50699	1	1.68	2	1	1.69599	1.7884	1.9058	1.74795	1.58582	1.29017	1.53706	1.47388	1.25323	1.20836	0.435001	1.20486	1.28889	1.40741	1.5	1.71211	1.4734	1.23399	1.56235	1.86856	1.05113	1.23556	1.22244	1.21593	1.55556	1.1488	1.48507	1.21875	1.27634	1.56281	1.24017	1.76435	1.32105	1.32243	1.41796	1.32013	1.29233	1.16244
ELF034A_282	0.888889	0.970414	2	0.222222	1	0.108408	0.114351	1	1.68	2	1	1.63163	1.76469	1.88816	1.67814	1.58582	1.21122	1.45252	1.34066	0.988565	1.14487	1.05505	0.709314	0.622222	1.2963	1.5	1.49393	1.39562	1.13705	1.37586	1.84762	0.894271	0.435556	0.722438	1.12897	1.55556	0.9088	1.39663	0.638393	1.1743	1.52849	0.490993	1.66746	0.904777	0.312537	0.176681	0.702716	0.267484	0.608505
ELF034A_261	0.722222	0.316568	0.5	0.388889	0.5	0.206699	0.222563	0.5	1.18	1.5	0.5	1.16628	1.2758	1.39551	1.21479	1.11687	0.76385	0.997314	0.912671	0.625894	0.668682	0.622647	0.451738	0.455556	0.851852	1	1.09393	0.934506	0.682971	0.969925	1.35809	0.511918	0.335556	0.467893	0.695466	1.05556	0.5488	0.944254	0.424107	0.725323	1.05371	0.373228	1.21244	0.613583	0.322977	0.265768	0.515313	0.202675	0.312587
ELF034A_225	0.555556	0.12426	1	0.555556	0	0.510118	0.508705	0	0.68	1	0	0.700936	0.795805	0.905804	0.754929	0.64793	0.316482	0.552203	0.490079	0.270713	0.208365	0.19957	0.211988	0.288889	0.407407	0.5	0.712107	0.473395	0.239093	0.56753	0.873797	0.129566	0.235556	0.231529	0.267077	0.555556	0.1888	0.502077	0.223214	0.276343	0.584656	0.26056	0.764347	0.331728	0.334515	0.4187	0.345795	0.293676	0.162441
ELF034A_195	1.55556	1.12426	2	1.55556	1	1.51012	1.50699	1	1.68	2	1	1.69599	1.7884	1.9058	1.74795	1.58582	1.29017	1.53706	1.47388	1.25323	1.20836	0.435001	1.20486	1.28889	1.40741	1.5	1.71211	1.4734	1.23399	1.56235	1.86856	1.05113	1.23556	1.22244	1.21593	1.55556	1.1488	1.48507	1.21875	1.27634	1.56281	1.24017	1.76435	1.32105	1.32243	1.41796	1.32013	1.29233	1.16244
ELF034A_183	0.722222	0.470414	1.5	0.388889	0.5	0.309263	0.308962	0.5	1.18	1.5	0.5	1.14401	1.27506	1.39551	1.20781	1.10445	0.76385	0.983434	0.89557	0.577205	0.47027	0.58302	0.364394	0.455556	0.851852	1	1.10302	0.878951	0.379399	0.953183	1.35809	0.374664	0.268889	0.358802	0.6392	1.05556	0.4688	0.944254	0.305804	0.286547	1.05085	0.293141	1.21244	0.555544	0.27957	0.29138	0.517257	0.227524	0.268855
ELF034A_172	0.773186	0.435131	1.33884	0.500459	0.338843	0.587111	0.577465	0.338843	1.01884	1.33884	0.338843	0.996125	1.10408	1.23582	1.05681	0.917321	0.582358	0.814878	0.737931	0.395845	0.469286	0.44708	0.114597	0.403489	0.715947	0.838843	0.995579	0.787996	0.19737	0.794232	1.20669	0.368587	0.295611	0.398884	0.466418	0.894399	0.456734	0.763461	0.139573	0.596633	0.858	0.277399	1.04531	0.520895	0.359022	0.468821	0.523321	0.429698	0.38175
ELF034A_166	0.753422	0.363153	1.2512	0.806756	0.2512	0.761318	0.759426	0.2512	0.9152	1.2512	0.2512	0.948968	1.04499	1.15665	1.00417	0.886211	0.563471	0.800324	0.736599	0.516669	0.449406	0.323963	0.462047	0.492089	0.591941	0.6312	0.963307	0.700151	0.488252	0.817164	1.1229	0.344687	0.454756	0.478002	0.489633	0.780089	0.4192	0.74593	0.469057	0.525094	0.827577	0.50314	1.01555	0.577751	0.578155	0.664109	0.589468	0.544124	0.398714
ELF034A_146	0.780045	0.194904	0.938776	0.589569	0.22449	0.705303	0.704355	0.22449	0.847347	1.22449	0.22449	0.446642	0.503681	0.582395	0.473809	0.407469	0.495859	0.346589	0.308243	0.217692	0.185689	0.311505	0.370779	0.246712	0.282691	0.438776	0.441792	0.301059	0.387781	0.35909	0.561264	0.185988	0.383855	0.218356	0.200007	0.303855	0.179004	0.320833	0.326531	0.413369	0.363859	0.316346	0.47376	0.231811	0.410025	0.624842	0.281572	0.491494	0.357776
ELF034A_126	0.86179	0.368672	1.29142	0.606235	0.335864	0.794035	0.788976	0.335864	1.01142	1.33586	0.335864	0.27998	0.319776	0.380214	0.297483	0.247977	0.575153	0.2101	0.183769	0.159594	0.161689	0.346208	0.415786	0.189938	0.186481	0.380309	0.2708	0.183148	0.440745	0.216207	0.36545	0.192663	0.415864	0.183504	0.138406	0.284012	0.167553	0.197559	0.345314	0.458353	0.220696	0.301076	0.290676	0.149484	0.400385	0.696559	0.210487	0.58426	0.462834
ELF034A_81	1.25848	0.712618	1.72846	1.22444	0.728456	1.18489	1.1835	0.728456	1.40505	1.72846	0.728456	0.00634636	0.00559116	0.0138478	0.00320237	0.00686099	0.905297	0.0255096	0.0407658	0.199153	0.282177	0.580379	0.749842	0.308693	0.0909465	0.377392	0.00795253	0.0536244	0.777623	0.0237966	0.0101405	0.40846	0.705856	0.288186	0.159336	0.143586	0.25581	0.0385081	0.634459	0.734543	0.0218074	0.49196	0.00414807	0.145753	0.618225	1.08786	0.222652	0.976458	0.863256
ELF034A_63	1.03981	0.521467	1.50873	0.987459	0.515237	0.958646	0.95635	0.515237	1.19486	1.51524	0.515237	0.0385277	0.0555035	0.0842832	0.0458956	0.0222607	0.707782	0.0244438	0.0247371	0.105828	0.176358	0.348226	0.530931	0.200346	0.0584866	0.312634	0.0414535	0.0394216	0.562448	0.0235965	0.0753576	0.257493	0.513741	0.176873	0.075509	0.134609	0.148442	0.0260916	0.439159	0.566805	0.027341	0.336077	0.0470804	0.0789215	0.455073	0.860574	0.142822	0.753539	0.644009
ELF034A_50	0.309112	0.199828	1.09555	0.53422	0.147495	0.514534	0.51251	0.147495	0.827495	1.13451	0.147495	0.493796	0.573084	0.666745	0.537609	0.444534	0.40639	0.374991	0.325232	0.153036	0.143017	0.159707	0.167988	0.184436	0.29372	0.43321	0.497265	0.325292	0.190955	0.37439	0.640896	0.104919	0.20383	0.13416	0.158984	0.434653	0.130581	0.340976	0.142799	0.274753	0.405001	0.161439	0.540342	0.195597	0.237726	0.423126	0.219463	0.322256	0.193659
ELF034A_20	0.567161	0.238362	1.17168	0.382464	0.173435	0.342852	0.340573	0.173435	0.853435	1.17168	0.173435	0.630506	0.732806	0.843532	0.690586	0.589464	0.340111	0.473824	0.407488	0.171505	0.23354	0.13311	0.0789666	0.181526	0.409827	0.553382	0.634619	0.46634	0.235733	0.481931	0.818399	0.151087	0.138688	0.154604	0.212242	0.573611	0.170555	0.428711	0.113308	0.356155	0.507667	0.119174	0.700467	0.247496	0.161036	0.198235	0.201298	0.197055	0.180141
ELF033_203	0.587452	0.391777	1.3382	0.15502	0.338203	0.204292	0.203115	0.338203	1.0182	1.3382	0.338203	1.00168	1.11143	1.23336	1.04927	0.929058	0.592807	0.829088	0.741144	0.450803	0.497233	0.232474	0.276452	0.288353	0.694559	0.838203	0.940974	0.767454	0.48477	0.803881	1.19743	0.317265	0.191777	0.317152	0.50754	0.893759	0.3843	0.777676	0.246987	0.567663	0.878039	0.21336	1.04457	0.451227	0.178629	0.176594	0.371275	0.157191	0.241247
ELF033_195	0.635058	0.261008	1.17253	0.480019	0.172526	0.477515	0.472347	0.172526	0.852526	1.17253	0.172526	0.858726	0.959097	1.07388	0.907243	0.795611	0.466976	0.701165	0.631039	0.383429	0.358004	0.200577	0.293977	0.349787	0.561845	0.672526	0.845732	0.630934	0.368311	0.703841	1.03938	0.244636	0.290252	0.311877	0.399039	0.728081	0.260861	0.65016	0.284756	0.434631	0.737566	0.307249	0.914341	0.427644	0.350537	0.408459	0.41622	0.31817	0.251978
ELF033_187	0.642876	0.22725	1.1151	0.519419	0.142876	0.520514	0.514007	0.142876	0.813616	1.14288	0.142876	0.832834	0.931595	1.04511	0.882663	0.776888	0.446443	0.678418	0.610694	0.369546	0.32868	0.293473	0.289619	0.339172	0.521476	0.642876	0.827289	0.605262	0.341908	0.68457	1.01192	0.235222	0.304357	0.310473	0.381559	0.682999	0.252416	0.627898	0.284761	0.409298	0.712181	0.321454	0.888992	0.421463	0.378042	0.446398	0.424677	0.3433	0.250112
ELF033_183	0.624589	0.251151	1.10322	0.487837	0.154504	0.549784	0.545291	0.154504	0.834504	1.1545	0.154504	0.830814	0.931923	1.05488	0.887147	0.765167	0.433199	0.663902	0.593301	0.306615	0.308737	0.299564	0.130832	0.310059	0.533421	0.654504	0.837707	0.613654	0.173032	0.660949	1.02427	0.222732	0.253307	0.29559	0.339346	0.710059	0.29715	0.612973	0.148551	0.418288	0.699331	0.249288	0.885135	0.406144	0.332609	0.438793	0.421841	0.349438	0.254449
ELF033_176	0.956397	0.527388	1.40509	0.820516	0.405087	0.906277	0.898515	0.405087	1.08509	1.40509	0.405087	1.05901	1.16149	1.29287	1.12282	0.969622	0.658043	0.880906	0.81331	0.480018	0.536413	0.519494	0.21118	0.559794	0.769324	0.892349	1.08952	0.859374	0.219931	0.872758	1.26551	0.467212	0.475887	0.537717	0.532754	0.95215	0.562805	0.830081	0.256515	0.676751	0.917606	0.44572	1.11429	0.647006	0.581879	0.743576	0.690244	0.673097	0.541902
ELF033_155	0.553489	0.150166	0.952479	0.280762	0.134298	0.3375	0.338003	0.134298	0.814298	1.1343	0.134298	0.549455	0.631887	0.730476	0.5881	0.500466	0.398746	0.418219	0.358073	0.171438	0.166255	0.206086	0.165926	0.123186	0.314432	0.452479	0.523678	0.358955	0.247927	0.411874	0.702288	0.0980877	0.13955	0.108595	0.190145	0.477732	0.126734	0.381504	0.128616	0.294685	0.45223	0.116918	0.586596	0.183079	0.159322	0.280675	0.181121	0.194748	0.151628
ELF033_118	1.03511	0.603801	1.47998	0.996914	0.479984	0.989193	0.983171	0.479984	1.15986	1.47934	0.479984	1.10038	1.22456	1.35727	1.19593	1.09018	0.51636	0.895309	0.826693	0.543319	0.61812	0.610231	0.366983	0.722992	0.880847	0.979024	1.18524	0.94952	0.533263	0.963994	1.34149	0.584469	0.64691	0.649451	0.585274	1.03405	0.606351	0.838512	0.545562	0.741727	0.915772	0.64204	1.22536	0.757398	0.746219	0.654323	0.709856	0.728156	0.607029
ELF033_075	0.752834	0.333749	1.26077	0.498866	0.356009	0.519362	0.521401	0.356009	1.03601	1.35601	0.356009	0.165856	0.207475	0.259012	0.18033	0.146205	0.564722	0.110496	0.0838406	0.069561	0.13807	0.328473	0.339833	0.0480726	0.0967498	0.3322	0.132619	0.0997745	0.453703	0.0963357	0.243519	0.151308	0.261406	0.0589666	0.0747972	0.213152	0.0800472	0.0994204	0.250354	0.446735	0.128887	0.141349	0.175554	0.02412	0.192356	0.466476	0.0356191	0.393393	0.374066
ELF033_046	0.708448	0.347083	1.33471	0.375115	0.334711	0.461767	0.46026	0.334711	1.01471	1.2438	0.334711	0.257294	0.307014	0.368055	0.274631	0.231653	0.550714	0.185451	0.149477	0.100032	0.161402	0.325338	0.313997	0.0478421	0.15626	0.380165	0.216653	0.165682	0.441615	0.169409	0.350107	0.150551	0.230872	0.0695455	0.113064	0.284206	0.101693	0.170275	0.227974	0.444078	0.207316	0.128414	0.267349	0.0554253	0.16498	0.404723	0.0575385	0.341861	0.317719
ELF033A_158	0.800405	0.384814	1.2593	0.699231	0.270143	0.725041	0.718714	0.270143	0.949059	1.27014	0.270143	0.924459	1.03448	1.1649	0.994217	0.862594	0.472947	0.741333	0.672414	0.351909	0.410543	0.385191	0.113654	0.451715	0.664904	0.770143	0.962862	0.735529	0.171589	0.74991	1.13903	0.344127	0.353215	0.404407	0.403299	0.823892	0.398672	0.687712	0.185092	0.538965	0.775692	0.335209	0.999007	0.51958	0.45011	0.533851	0.530036	0.500712	0.388734
ELF033A_126	0.666667	0.320842	1.22222	0.444444	0.222222	0.498722	0.496254	0.222222	0.902222	1.22222	0.222222	0.908307	1.00815	1.12312	0.959117	0.834956	0.516774	0.74982	0.676298	0.43509	0.401487	0.264838	0.345678	0.311111	0.537037	0.722222	0.888875	0.675247	0.438356	0.752163	1.08991	0.273356	0.324444	0.358297	0.444116	0.777778	0.357689	0.699922	0.336806	0.481559	0.783304	0.343358	0.961194	0.466781	0.375236	0.430578	0.448914	0.343523	0.286509
ELF033A_111	0.958302	0.528098	1.41693	0.53277	0.416931	0.896497	0.887451	0.416931	1.09693	1.41693	0.416931	1.07015	1.15593	1.27386	1.11349	0.992177	0.713816	0.903948	0.834543	0.600465	0.546606	0.5552	0.514154	0.558302	0.767601	0.895654	1.05844	0.832643	0.539762	0.915396	1.2465	0.470568	0.595749	0.573992	0.607173	0.944117	0.577646	0.86227	0.504792	0.683287	0.931052	0.581309	1.10088	0.658017	0.662388	0.78379	0.699591	0.680742	0.55183
ELF033A_098	0.66118	0.305858	1.20439	0.364883	0.20439	0.506847	0.501455	0.20439	0.88439	1.20439	0.20439	0.880023	0.980002	1.10279	0.932429	0.80217	0.481885	0.709625	0.635063	0.35331	0.357493	0.341972	0.185044	0.290809	0.545953	0.70439	0.867002	0.653093	0.261699	0.703836	1.07237	0.255524	0.262167	0.31437	0.390383	0.759945	0.342819	0.661115	0.188517	0.46108	0.747155	0.261711	0.925676	0.425278	0.3212	0.408071	0.428216	0.33758	0.27116
ELF033A_070	0.688368	0.353227	1.25781	0.313368	0.257812	0.50511	0.498875	0.257812	0.937813	1.25781	0.257812	0.929046	1.02954	1.15443	0.980019	0.852171	0.528242	0.754259	0.676785	0.384877	0.400701	0.385412	0.198187	0.321701	0.616609	0.757812	0.908556	0.699958	0.288997	0.744139	1.12441	0.294241	0.276701	0.341046	0.4309	0.813368	0.384113	0.706318	0.197266	0.511197	0.793619	0.272787	0.969391	0.454033	0.324951	0.408185	0.452655	0.349339	0.301449
ELF033A_050	0.930556	0.422337	1.375	0.763889	0.375	0.880844	0.878145	0.375	1.055	1.375	0.375	0.239303	0.274138	0.326393	0.256456	0.215477	0.612535	0.185247	0.167059	0.173803	0.142889	0.388089	0.477362	0.230556	0.171296	0.375	0.23938	0.165062	0.490369	0.193494	0.312933	0.230056	0.477222	0.213347	0.142077	0.263889	0.1838	0.175546	0.410714	0.482976	0.193275	0.35125	0.253534	0.162365	0.460065	0.782564	0.228377	0.662967	0.527237
ELF032A_177	0.973632	0.488558	1.48301	0.883445	0.485176	0.853417	0.85181	0.485176	1.16474	1.48301	0.485176	0.0544048	0.0759659	0.107727	0.0623025	0.0374922	0.680275	0.0344737	0.029563	0.0980966	0.167842	0.316791	0.50462	0.161223	0.0568455	0.310934	0.0475397	0.0432396	0.559027	0.0307581	0.097103	0.230946	0.457817	0.145729	0.0728212	0.142464	0.125795	0.0339556	0.409491	0.539371	0.0404757	0.292503	0.0634209	0.0595149	0.391773	0.768085	0.108034	0.669226	0.584746
ELF032A_153	1.07927	0.648709	1.52495	1.03962	0.525867	1.03117	1.02529	0.525867	1.20568	1.52587	0.525867	1.14134	1.26677	1.3989	1.23869	1.13766	0.546555	0.934923	0.866164	0.590367	0.663481	0.657499	0.427502	0.772648	0.926308	1.0231	1.22875	0.99331	0.607249	1.00999	1.38409	0.632218	0.701303	0.696966	0.629995	1.07804	0.648001	0.87801	0.614342	0.786686	0.953906	0.699006	1.27091	0.803775	0.798253	0.685348	0.748661	0.768678	0.650841
ELF032A_117	0.991933	0.560277	1.43638	0.908599	0.436377	0.946441	0.939975	0.436377	1.11638	1.43638	0.436377	1.06083	1.18182	1.31309	1.15227	1.04874	0.488694	0.858052	0.789074	0.515349	0.574479	0.570715	0.356915	0.676412	0.837708	0.934814	1.13807	0.902116	0.516801	0.925884	1.29684	0.538614	0.614641	0.609248	0.551812	0.989849	0.566427	0.802641	0.522656	0.698131	0.877901	0.610636	1.17925	0.714063	0.70999	0.624979	0.671409	0.6875	0.565153
ELF032A_095	1.05886	0.629079	1.50579	1.01648	0.505792	1.01137	1.0053	0.505792	1.18579	1.50579	0.505792	1.12172	1.24651	1.37897	1.21819	1.11524	0.533005	0.915813	0.847098	0.567386	0.642064	0.635779	0.397656	0.749125	0.906553	1.0032	1.20783	0.972684	0.571459	0.987728	1.36378	0.609834	0.675314	0.674176	0.608536	1.0579	0.62865	0.859046	0.580486	0.766141	0.935469	0.671178	1.24891	0.781403	0.772842	0.670204	0.729868	0.750363	0.630945
ELF032A_074	1.05507	0.624416	1.50071	1.00687	0.500707	1.00831	1.00224	0.500707	1.18071	1.50071	0.500707	1.11911	1.24348	1.3758	1.21507	1.11273	0.529864	0.91332	0.844508	0.566598	0.63834	0.631749	0.400394	0.745992	0.903224	0.999114	1.20439	0.968687	0.573796	0.985655	1.36053	0.605748	0.674283	0.671605	0.606553	1.05414	0.625368	0.856646	0.582029	0.761556	0.932753	0.670831	1.24571	0.77846	0.771605	0.668349	0.727278	0.747108	0.626939
ELF032A_047	1.0616	0.630325	1.50629	1.02619	0.507779	1.01403	1.00821	0.507779	1.18778	1.50778	0.507779	1.11776	1.2422	1.37381	1.21415	1.11258	0.533272	0.912965	0.844781	0.569474	0.643076	0.637956	0.40751	0.750952	0.902722	1.00146	1.20424	0.970236	0.583328	0.986068	1.35872	0.612157	0.68063	0.675753	0.609281	1.05491	0.627976	0.85638	0.590868	0.766944	0.932237	0.676837	1.24581	0.781764	0.777428	0.672367	0.728921	0.752813	0.633513
ELF060_465	0.706654	0.314263	1.23539	0.458889	0.34267	0.438994	0.439798	0.34267	1.02267	1.34267	0.34267	0.189939	0.238818	0.294248	0.208175	0.169963	0.549452	0.129213	0.0983926	0.0613281	0.127632	0.314051	0.294572	0.0277271	0.106825	0.344585	0.153941	0.115639	0.410815	0.110428	0.277007	0.131615	0.207855	0.0314957	0.0756216	0.234113	0.0652628	0.116568	0.205406	0.399997	0.152795	0.096604	0.204764	0.0145554	0.137751	0.391534	0.0159946	0.323008	0.323079
ELF060_420	0.822416	0.403385	1.36585	0.629687	0.4263	0.59867	0.59894	0.4263	1.10577	1.4263	0.4263	0.1002	0.135094	0.176763	0.111987	0.086497	0.620781	0.0626798	0.0445475	0.0617304	0.143769	0.368332	0.382118	0.0623632	0.0648356	0.320518	0.0723575	0.0635579	0.485192	0.0461536	0.163469	0.180456	0.30408	0.0653305	0.0647381	0.175022	0.0852178	0.0572167	0.284657	0.473808	0.0791011	0.16298	0.109261	0.011855	0.223926	0.538137	0.0300799	0.464645	0.443006
ELF060_350	0.611341	0.277943	1.21992	0.328183	0.289936	0.300537	0.300919	0.289936	0.969936	1.28994	0.289936	0.312677	0.378444	0.450723	0.340003	0.283061	0.498698	0.224816	0.180009	0.0681368	0.149705	0.282843	0.176542	0.0120413	0.183406	0.402538	0.272543	0.207633	0.318732	0.198345	0.429655	0.115706	0.1118	0.0211464	0.105088	0.328961	0.0760286	0.202787	0.104931	0.3777	0.256868	0.0274371	0.334995	0.0432321	0.0532608	0.252597	0.024001	0.206392	0.23713
ELF060_250	0.820585	0.378024	1.32842	0.628235	0.393991	0.626177	0.625463	0.393991	1.07399	1.39399	0.393991	0.0986602	0.133878	0.178089	0.111744	0.0829556	0.593907	0.0573572	0.0390124	0.0505532	0.119868	0.342943	0.361135	0.0673606	0.0626005	0.307106	0.0769776	0.0561655	0.443589	0.0446116	0.16493	0.161358	0.306049	0.0631055	0.0494709	0.167033	0.0769548	0.0513257	0.269386	0.445978	0.0725469	0.165116	0.108522	0.0109866	0.237647	0.556676	0.039878	0.472057	0.431344
ELF059_378	0.689411	0.267055	1.23171	0.48146	0.231715	0.536077	0.533311	0.231715	0.911715	1.23171	0.231715	0.244123	0.297271	0.364475	0.268229	0.208609	0.464179	0.165228	0.130922	0.0638126	0.0927661	0.245403	0.249063	0.0582181	0.108031	0.328045	0.227809	0.140584	0.313721	0.15935	0.345677	0.0964842	0.226291	0.0582393	0.0655106	0.249044	0.0663861	0.146916	0.185311	0.335431	0.185718	0.131127	0.265926	0.0541243	0.203542	0.454253	0.0821541	0.364874	0.298507
ELF059_359	0.604298	0.230589	1.15736	0.370152	0.206141	0.379198	0.376937	0.206141	0.885751	1.20419	0.206141	0.375017	0.447548	0.533194	0.410758	0.33255	0.427655	0.267079	0.21856	0.0598482	0.130975	0.228632	0.0877919	0.051843	0.216801	0.402726	0.356359	0.249065	0.187783	0.247828	0.511143	0.0939085	0.112331	0.0477188	0.0955997	0.360396	0.0869996	0.238399	0.0464852	0.347094	0.298173	0.0385652	0.405039	0.0855766	0.0989623	0.298588	0.0883329	0.23966	0.217735
ELF059_337	0.826709	0.382682	1.32633	0.651996	0.409084	0.620705	0.620949	0.409084	1.08633	1.40908	0.409084	0.0926427	0.126861	0.16856	0.104737	0.0795034	0.608325	0.0554942	0.0384044	0.05872	0.129765	0.35652	0.385139	0.0699273	0.0578711	0.309084	0.0689662	0.0542036	0.473688	0.0421119	0.155205	0.171375	0.313605	0.0658798	0.0569181	0.160042	0.0784361	0.0500539	0.289719	0.455167	0.0708609	0.172867	0.103058	0.0118666	0.240538	0.557974	0.0364747	0.473724	0.438621
ELF059_280	0.577351	0.221396	1.1864	0.330437	0.211096	0.318132	0.316354	0.211096	0.881219	1.2111	0.211096	0.330135	0.398652	0.475978	0.360203	0.295726	0.437584	0.234546	0.187679	0.0661861	0.118461	0.231783	0.161866	0.0193263	0.171315	0.377763	0.298287	0.204381	0.278735	0.216155	0.45326	0.0792235	0.105911	0.0205148	0.0930256	0.305746	0.0542169	0.209309	0.100646	0.320143	0.265394	0.0392651	0.357817	0.0512533	0.0748879	0.262038	0.0423759	0.200234	0.199329
ELF059_270	0.626177	0.243581	1.15893	0.409759	0.229826	0.402974	0.401513	0.229826	0.908333	1.22983	0.229826	0.318766	0.385741	0.465097	0.351286	0.279744	0.444629	0.221153	0.177641	0.042219	0.12076	0.233939	0.108513	0.0408539	0.181802	0.380945	0.300125	0.209647	0.209067	0.201449	0.444484	0.0966608	0.127073	0.0374231	0.0750891	0.31772	0.0747451	0.195826	0.0606326	0.355164	0.250175	0.0404635	0.34599	0.0614416	0.1037	0.323647	0.0667192	0.264859	0.242088
ELF059_230	0.78208	0.335005	1.26574	0.586001	0.338138	0.606078	0.605116	0.338138	1.01633	1.32909	0.338138	0.125719	0.164202	0.214478	0.141087	0.104362	0.547571	0.0741603	0.0521604	0.0452904	0.107517	0.305894	0.326269	0.0587011	0.0642986	0.299677	0.106107	0.0684461	0.407802	0.0644318	0.200043	0.13854	0.284704	0.0597122	0.0432958	0.172728	0.0682955	0.0644121	0.244065	0.422958	0.0893603	0.155279	0.137603	0.0165858	0.229975	0.532424	0.0461988	0.446412	0.392245
ELF059_210	0.670717	0.267944	1.197	0.472416	0.251768	0.468124	0.466027	0.251768	0.93139	1.24988	0.251768	0.260528	0.320477	0.393222	0.289711	0.225231	0.462241	0.173992	0.136572	0.0285065	0.111631	0.249102	0.138941	0.0443396	0.147057	0.35139	0.245831	0.167918	0.23044	0.156168	0.37456	0.103528	0.16123	0.0393275	0.0548788	0.275375	0.0684056	0.152234	0.0867074	0.375522	0.199273	0.0608379	0.284583	0.045474	0.134302	0.383125	0.0605416	0.318478	0.283374
ELF059A_355	0.71378	0.316093	1.21427	0.595418	0.247834	0.565699	0.562226	0.247834	0.927769	1.24735	0.247834	0.623119	0.724437	0.832444	0.692845	0.60956	0.3426	0.464706	0.406309	0.196473	0.275726	0.318988	0.142665	0.29161	0.445585	0.588207	0.661877	0.494371	0.306279	0.499641	0.815132	0.243821	0.286043	0.246156	0.234585	0.592175	0.235447	0.421472	0.228414	0.443296	0.488562	0.250478	0.710824	0.318234	0.323294	0.337396	0.278107	0.368069	0.306478
ELF059A_320	0.780856	0.35226	1.31302	0.570329	0.365651	0.575274	0.574415	0.365651	1.04565	1.36565	0.365651	0.125602	0.1659	0.214412	0.141247	0.108383	0.569945	0.0771105	0.0547448	0.0481844	0.106597	0.325495	0.330805	0.0545399	0.074228	0.313019	0.101921	0.069163	0.410195	0.0636715	0.200043	0.137115	0.271382	0.046223	0.0502808	0.184364	0.0649773	0.0693925	0.239829	0.405152	0.0950503	0.140092	0.138011	0.00832304	0.207222	0.508318	0.0339068	0.428405	0.389378
ELF059A_250	0.761561	0.31244	1.23497	0.670374	0.263125	0.649819	0.646533	0.263125	0.942881	1.26251	0.263125	0.333317	0.40694	0.488114	0.385072	0.326551	0.368501	0.221576	0.184156	0.0770738	0.158416	0.286887	0.191094	0.19008	0.23231	0.413064	0.368139	0.256818	0.317076	0.251672	0.475809	0.177773	0.300802	0.149489	0.092787	0.352341	0.128559	0.193797	0.231582	0.410175	0.236061	0.214147	0.399457	0.160186	0.307804	0.441611	0.153919	0.439145	0.353461
ELF059A_190	0.725063	0.320213	1.22899	0.602502	0.249133	0.589971	0.586151	0.249133	0.929039	1.24866	0.249133	0.581708	0.678825	0.783311	0.648964	0.5686	0.34442	0.429188	0.373829	0.178676	0.257378	0.314912	0.148645	0.278193	0.415686	0.563418	0.620995	0.460519	0.304783	0.464451	0.767092	0.23472	0.293119	0.235045	0.212862	0.55785	0.222026	0.388286	0.229207	0.440211	0.451023	0.248917	0.665988	0.297133	0.327043	0.359979	0.264014	0.387132	0.317895
ELF059A_135	0.688413	0.274047	1.18077	0.555598	0.205804	0.560037	0.555764	0.205804	0.885128	1.2058	0.205804	0.51984	0.611384	0.714068	0.581033	0.494935	0.336122	0.37489	0.321521	0.123791	0.200201	0.262398	0.0873883	0.216301	0.354121	0.504891	0.55202	0.395602	0.210163	0.397295	0.696479	0.177147	0.235598	0.177918	0.158412	0.49325	0.175318	0.336127	0.144221	0.392735	0.398489	0.181525	0.591431	0.23564	0.27012	0.357117	0.22227	0.357532	0.281034
ELF003_349	0.861678	0.342471	1.30612	0.861678	0.306122	0.81624	0.814095	0.306122	0.871837	1.30612	0.306122	0.992207	1.09304	1.20604	1.05407	0.948729	0.566213	0.83399	0.770485	0.547586	0.496347	0.490374	0.484497	0.595011	0.681784	0.663265	1.01823	0.750946	0.543029	0.863761	1.17618	0.424484	0.503583	0.52856	0.534471	0.671202	0.466351	0.780016	0.522959	0.567888	0.862326	0.559818	1.07047	0.629654	0.636242	0.670946	0.630145	0.589437	0.450238
ELF003_340	0.666667	0.406312	1.33333	0.444444	0.333333	0.376214	0.375543	0.333333	1.01333	1.33333	0.333333	0.976514	1.09655	1.22051	1.04638	0.935715	0.474377	0.79132	0.710001	0.438836	0.49937	0.211225	0.296955	0.4	0.703704	0.833333	0.972713	0.780802	0.535011	0.812376	1.19142	0.358324	0.302222	0.380014	0.482763	0.888889	0.3888	0.735637	0.360119	0.56886	0.828719	0.326936	1.06538	0.508512	0.320962	0.227163	0.407485	0.265245	0.297523
ELF003_332	0.75178	0.36291	1.23883	0.615159	0.266301	0.626375	0.621513	0.266301	0.946128	1.26608	0.266301	0.864354	0.980889	1.10856	0.944403	0.83568	0.373813	0.674077	0.603162	0.318581	0.387684	0.357511	0.141119	0.418756	0.633371	0.741104	0.910652	0.694773	0.293919	0.7112	1.08777	0.324305	0.340435	0.368842	0.366639	0.791576	0.361189	0.620853	0.254259	0.509005	0.702589	0.332827	0.960847	0.478461	0.412642	0.381791	0.437892	0.416277	0.33948
ELF003_291	0.956066	0.524771	1.40051	0.932256	0.40051	0.910628	0.904022	0.40051	1.08051	1.40051	0.40051	1.04257	1.15737	1.29297	1.12365	0.983223	0.558158	0.850866	0.783221	0.444141	0.535746	0.512834	0.165847	0.598923	0.792045	0.90051	1.10515	0.872318	0.231987	0.867615	1.26982	0.482457	0.483685	0.542104	0.505	0.956066	0.546453	0.795323	0.277105	0.667378	0.883613	0.458408	1.13124	0.657474	0.595897	0.668637	0.66549	0.663197	0.534629
ELF003_236	0.649306	0.544933	1.34375	0.149306	0.59375	0.0269445	0.0335932	0.59375	1.27375	1.59375	0.59375	1.23528	1.36011	1.48522	1.28629	1.18267	0.818127	1.05715	0.957592	0.61337	0.740607	0.669194	0.341834	0.365972	0.917824	1.09375	1.13881	1.00881	0.666389	0.999157	1.44726	0.537041	0.195972	0.424143	0.730392	1.14931	0.56755	1.00186	0.301339	0.793563	1.12413	0.233178	1.27765	0.590254	0.131974	0.0582926	0.445669	0.0947798	0.318873
ELF003_180	0.56933	0.254585	1.07438	0.326905	0.256198	0.237955	0.239669	0.256198	0.936198	1.2562	0.256198	0.61195	0.704259	0.807725	0.657327	0.557432	0.474594	0.474935	0.410462	0.169744	0.27553	0.235806	0.0620931	0.120845	0.400979	0.57438	0.580702	0.456866	0.224419	0.44408	0.779686	0.17899	0.0796327	0.124091	0.23404	0.56933	0.190453	0.434218	0.03826	0.439777	0.517921	0.0406688	0.652505	0.20925	0.0668374	0.182963	0.167525	0.153513	0.194944
ELF003_150	0.643991	0.263978	1.18367	0.453515	0.183673	0.493547	0.488786	0.183673	0.863673	1.18367	0.183673	0.603846	0.69715	0.805865	0.65937	0.556537	0.376095	0.454128	0.393953	0.160646	0.22197	0.262697	0.065129	0.205896	0.368859	0.397959	0.61656	0.418973	0.168393	0.457421	0.782228	0.161979	0.152562	0.178839	0.187689	0.548753	0.183902	0.409754	0.0880102	0.395877	0.484472	0.145206	0.661317	0.255419	0.226823	0.334583	0.251975	0.311946	0.240325
ELF003_130	0.555556	0.26412	1.18182	0.191919	0.272727	0.200094	0.200439	0.272727	0.952727	1.27273	0.272727	0.482214	0.562404	0.649922	0.515678	0.444655	0.493515	0.368148	0.309079	0.137811	0.208365	0.296412	0.150571	0.040404	0.301347	0.5	0.431529	0.336526	0.314464	0.338658	0.624868	0.136696	0.0779798	0.057562	0.188026	0.464646	0.1288	0.338193	0.0876623	0.38395	0.407281	0.0250304	0.508606	0.116857	0.0282214	0.163318	0.0787234	0.12938	0.184704
ELF005A_76	0.721257	0.296468	1.19058	0.651605	0.190577	0.648264	0.643398	0.190577	0.855652	1.17565	0.190577	0.85734	0.962578	1.08887	0.922792	0.78511	0.420649	0.682307	0.614251	0.319992	0.35156	0.151967	0.129119	0.394889	0.588034	0.690577	0.888166	0.656344	0.183287	0.692994	1.05976	0.254003	0.30673	0.346868	0.350581	0.721257	0.335795	0.629094	0.183781	0.460676	0.714984	0.297412	0.928275	0.458153	0.400473	0.488506	0.464502	0.429293	0.312027
ELF005A_70	0.562358	0.251535	1.17611	0.382464	0.176115	0.329429	0.327956	0.176115	0.843416	1.17611	0.176115	0.846641	0.954683	1.07473	0.902012	0.778299	0.42994	0.680028	0.603016	0.318496	0.34971	0.112318	0.153827	0.263946	0.542958	0.660242	0.830358	0.620586	0.284984	0.671233	1.04052	0.191768	0.166168	0.25079	0.359077	0.710506	0.269677	0.626793	0.161021	0.425895	0.721497	0.184949	0.904651	0.377957	0.212339	0.252066	0.33747	0.202327	0.188063
ELF005A_61	0.552801	0.307986	1.23967	0.310376	0.239669	0.240075	0.240248	0.239669	0.919669	1.23967	0.239669	0.898751	1.01366	1.13344	0.957156	0.849203	0.455673	0.72729	0.644486	0.353646	0.409073	0.256997	0.178444	0.261892	0.596572	0.739669	0.871612	0.675691	0.376258	0.717491	1.10062	0.233763	0.160073	0.264587	0.41607	0.795225	0.312106	0.673719	0.195027	0.477052	0.772087	0.185771	0.959977	0.401466	0.17848	0.159415	0.327512	0.150416	0.189017
ELF005A_50	0.691358	0.317043	1.20988	0.469136	0.209877	0.547155	0.533238	0.209877	0.889877	1.20988	0.209877	0.88111	0.982965	1.10915	0.938433	0.812258	0.476651	0.709784	0.636349	0.336325	0.358277	0.339516	0.132302	0.335802	0.592593	0.709877	0.8836	0.664753	0.193301	0.701934	1.07902	0.265368	0.267654	0.328274	0.379199	0.765432	0.354232	0.659421	0.151841	0.468079	0.746401	0.259864	0.932701	0.439611	0.341095	0.446361	0.450782	0.376845	0.295868
ELF005A_42	1.02232	0.591024	1.46676	0.968266	0.466764	0.976882	0.969412	0.466764	1.14676	1.46676	0.466764	1.11003	1.22353	1.36057	1.18896	1.04251	0.640287	0.918294	0.850146	0.497304	0.594906	0.575614	0.193133	0.651148	0.862159	0.966764	1.1688	0.936556	0.242399	0.926149	1.33702	0.539096	0.529347	0.598539	0.563384	1.02232	0.614483	0.863307	0.293984	0.737592	0.952714	0.497137	1.19071	0.714328	0.642443	0.745273	0.733811	0.7306	0.600681
ELF005_145	0.618896	0.355989	1.28225	0.39999	0.282245	0.3321	0.331265	0.282245	0.962245	1.28225	0.282245	0.943356	1.05636	1.1787	1.00013	0.88197	0.519387	0.772261	0.691102	0.37391	0.444413	0.327552	0.148901	0.318398	0.646535	0.752395	0.920269	0.713186	0.306977	0.750027	1.14518	0.271337	0.179493	0.304548	0.445876	0.837801	0.362389	0.718579	0.159045	0.524474	0.820441	0.200397	0.996187	0.444268	0.219598	0.254614	0.395688	0.2294	0.247741
ELF005_130	0.902778	0.514218	1.40278	0.847222	0.402778	0.796086	0.790725	0.402778	1.08278	1.40278	0.402778	1.04596	1.16229	1.29633	1.1228	0.985491	0.574523	0.85761	0.786196	0.433686	0.539714	0.485797	0.134373	0.558333	0.800926	0.902778	1.0914	0.864136	0.218827	0.859183	1.2709	0.447376	0.416111	0.503246	0.508729	0.958333	0.531578	0.801963	0.225694	0.667216	0.895736	0.395227	1.12445	0.628769	0.512385	0.590409	0.626424	0.583738	0.492332
ELF005_110	0.577257	0.270962	1.18837	0.41059	0.188368	0.347702	0.346133	0.188368	0.868368	1.18837	0.188368	0.84836	0.960469	1.08492	0.910283	0.786609	0.414938	0.674457	0.597102	0.28755	0.350767	0.212724	0.0721473	0.271701	0.565683	0.688368	0.843468	0.637458	0.20903	0.664194	1.05311	0.211724	0.151701	0.249632	0.348135	0.743924	0.287168	0.620292	0.101687	0.437926	0.71801	0.159795	0.911481	0.379891	0.201157	0.240281	0.340507	0.213099	0.199084
ELF005_90	0.767834	0.370856	1.25739	0.697659	0.257392	0.672357	0.668462	0.257392	0.933382	1.25739	0.257392	0.933836	1.03561	1.15853	0.992594	0.849406	0.512404	0.765447	0.696912	0.416586	0.432976	0.0774694	0.255502	0.459731	0.654217	0.757392	0.950588	0.719508	0.309742	0.771679	1.12591	0.299582	0.372646	0.411363	0.436422	0.812947	0.397069	0.712702	0.286963	0.525705	0.79927	0.369598	0.997491	0.524438	0.456709	0.552075	0.525645	0.471638	0.371037
ELF005_71	0.509688	0.309596	1.24792	0.249801	0.247917	0.187848	0.188094	0.247917	0.927917	1.24792	0.247917	0.907404	1.02213	1.1428	0.962736	0.853106	0.4801	0.736559	0.651862	0.347953	0.412968	0.292456	0.148959	0.238501	0.604477	0.747917	0.869116	0.680634	0.347872	0.714702	1.10885	0.235908	0.121891	0.246626	0.420235	0.803473	0.310616	0.683235	0.149627	0.482061	0.785621	0.146122	0.961123	0.387404	0.131753	0.128271	0.313841	0.116533	0.172971
ELF005_61.5	1.15228	0.74328	1.62571	1.12329	0.625709	1.07488	1.07349	0.625709	1.30571	1.62571	0.625709	1.31696	1.41823	1.53036	1.37502	1.26662	0.933038	1.16881	1.10146	0.865211	0.81406	0.813319	0.786391	0.775467	0.941329	1.12571	1.32754	1.09572	0.8282	1.17689	1.49814	0.710944	0.814888	0.827989	0.861206	1.18126	0.795378	1.11522	0.796516	0.897616	1.19519	0.835146	1.38344	0.930404	0.900931	0.983823	0.934585	0.873425	0.758235
ELF005_59	0.915556	0.48426	1.36	0.648889	0.36	0.859861	0.847491	0.36	1.04	1.36	0.36	1.0342	1.13121	1.25875	1.0905	0.958241	0.634377	0.859206	0.789953	0.490388	0.498524	0.498964	0.291061	0.542222	0.767407	0.86	1.04847	0.815617	0.302154	0.859958	1.2317	0.42682	0.488889	0.513347	0.526821	0.915556	0.5088	0.811056	0.312679	0.636343	0.891301	0.465773	1.07729	0.616478	0.581768	0.720942	0.662094	0.63702	0.502616
ELF005_37	1.10514	0.673847	1.54959	1.04454	0.549587	1.0597	1.05207	0.549587	1.22959	1.54959	0.549587	1.20237	1.31105	1.44831	1.27437	1.11959	0.771571	1.01679	0.948839	0.583153	0.678587	0.652314	0.256308	0.723324	0.946893	1.04959	1.25054	1.01894	0.269895	1.007	1.42172	0.614981	0.591203	0.674917	0.652516	1.10514	0.70566	0.96261	0.328808	0.819436	1.05501	0.553669	1.26864	0.791982	0.706929	0.866411	0.831159	0.819269	0.686584
ELF006_95	0.715278	0.296803	1.24306	0.520833	0.243056	0.577959	0.572976	0.243056	0.923056	1.24306	0.243056	0.426046	0.497934	0.587586	0.465989	0.377528	0.465239	0.313923	0.268613	0.0954369	0.158431	0.272656	0.096606	0.143056	0.275463	0.451389	0.429405	0.302562	0.139674	0.300052	0.567333	0.142229	0.206389	0.125342	0.126927	0.409722	0.155189	0.285523	0.0711806	0.380793	0.341362	0.119227	0.458671	0.160285	0.221206	0.460197	0.194962	0.391556	0.311959
ELF006_66	0.60771	0.271653	1.14739	0.385488	0.24263	0.342492	0.341299	0.24263	0.92263	1.24263	0.24263	0.576523	0.669687	0.774625	0.628241	0.532087	0.42628	0.434671	0.373188	0.133045	0.245402	0.286578	0.0229061	0.137868	0.385488	0.552154	0.567725	0.435602	0.172929	0.416856	0.750933	0.177985	0.109932	0.131302	0.197443	0.544218	0.185716	0.394529	0.0287698	0.429566	0.472335	0.0605951	0.625695	0.208082	0.112886	0.2294	0.178924	0.219187	0.224313
ELF006_39	0.824869	0.335094	1.24592	0.778086	0.316097	0.717953	0.715067	0.316097	0.996097	1.3161	0.316097	0.147657	0.191902	0.249714	0.173748	0.118217	0.505617	0.086099	0.0665235	0.0269615	0.110928	0.211819	0.24951	0.125454	0.093875	0.307325	0.159305	0.098849	0.300894	0.0837102	0.235637	0.142257	0.308378	0.0935592	0.0271551	0.19329	0.0838446	0.0716648	0.2059	0.428817	0.0997931	0.174803	0.174962	0.0581689	0.289961	0.603225	0.100325	0.520793	0.423912
ELF004_273	0.763719	0.350006	1.32245	0.630385	0.322449	0.592274	0.589825	0.322449	1.00245	1.32245	0.322449	0.231306	0.286	0.353127	0.260025	0.198063	0.517126	0.155734	0.125322	0.0318989	0.142152	0.294113	0.161124	0.0894331	0.152079	0.365306	0.228582	0.165685	0.240259	0.136336	0.337009	0.150614	0.222766	0.0765753	0.0601873	0.268481	0.104392	0.137062	0.113776	0.441358	0.178214	0.100675	0.254962	0.0654034	0.195049	0.487442	0.0922835	0.423704	0.377768
ELF004_240	0.611111	0.295201	1.22222	0.333333	0.222222	0.377639	0.372217	0.222222	0.902222	1.22222	0.222222	0.745353	0.8442	0.961115	0.796814	0.678641	0.46195	0.586728	0.515932	0.233988	0.306248	0.247355	0.0613639	0.211111	0.5	0.638889	0.729027	0.556728	0.175601	0.565576	0.932407	0.204729	0.146667	0.206781	0.292795	0.666667	0.251022	0.540909	0.0570437	0.447545	0.627471	0.120872	0.788184	0.308787	0.174137	0.285626	0.293653	0.247038	0.232574
ELF004_198	0.628889	0.310414	1.24	0.362222	0.24	0.39969	0.396695	0.24	0.92	1.24	0.24	0.745392	0.838101	0.948452	0.790915	0.671781	0.489377	0.595421	0.527109	0.290051	0.330111	0.0782643	0.199047	0.242222	0.497407	0.64	0.722107	0.55284	0.319399	0.5842	0.917724	0.208781	0.208889	0.237438	0.319865	0.662222	0.2628	0.55143	0.181295	0.460221	0.631962	0.188802	0.789122	0.328766	0.225284	0.326554	0.303447	0.270748	0.256377
ELF004_151	0.727177	0.336553	1.2176	0.612234	0.286564	0.547934	0.545424	0.286564	0.966564	1.28656	0.286564	0.603068	0.689163	0.792774	0.652614	0.540405	0.50232	0.469878	0.415986	0.17689	0.282011	0.25448	0.0655807	0.235223	0.414278	0.545184	0.61027	0.461491	0.144587	0.448797	0.768052	0.224108	0.20028	0.208688	0.225569	0.566257	0.243639	0.430325	0.0655045	0.481274	0.504891	0.142444	0.648333	0.275258	0.23832	0.432243	0.283965	0.383625	0.331984
ELF004_84	0.88905	0.422609	1.40246	0.817211	0.411081	0.769268	0.767615	0.411081	1.09108	1.41108	0.411081	0.0746746	0.106323	0.149061	0.0902134	0.0527461	0.600634	0.0377699	0.0264274	0.0420218	0.132787	0.290238	0.356672	0.118935	0.0569937	0.299012	0.0741284	0.0513818	0.415392	0.0293108	0.137288	0.181958	0.361579	0.10076	0.0355083	0.150544	0.0945357	0.0315305	0.281866	0.488972	0.0485474	0.207021	0.0896081	0.0362052	0.312543	0.670083	0.0810769	0.585161	0.504531
ELF004_50	0.790123	0.23917	1.23457	0.790123	0.234568	0.742786	0.740422	0.234568	0.825679	1.23457	0.234568	0.365097	0.426422	0.504751	0.402721	0.319351	0.472103	0.272646	0.239999	0.126171	0.146636	0.203627	0.22671	0.22716	0.234568	0.401235	0.387079	0.259815	0.240101	0.274333	0.484747	0.168055	0.321975	0.180238	0.123697	0.197531	0.156701	0.245715	0.207782	0.402068	0.291749	0.2327	0.405297	0.188859	0.355896	0.622005	0.237439	0.518991	0.384699
ELF001A_348	0.817222	0.334645	1.295	0.683889	0.295	0.735032	0.730224	0.295	0.975	1.295	0.295	0.223906	0.273249	0.340216	0.251848	0.188893	0.50885	0.149348	0.123243	0.0472982	0.100984	0.284313	0.20984	0.137222	0.146852	0.345	0.23438	0.147284	0.219807	0.143054	0.32508	0.138291	0.297222	0.104256	0.0531256	0.250556	0.1098	0.133811	0.161741	0.381547	0.166473	0.17034	0.247236	0.086768	0.29446	0.61318	0.148221	0.520845	0.405254
ELF001A_310	0.848073	0.402125	1.38776	0.752834	0.387755	0.695187	0.694823	0.387755	1.06776	1.38776	0.387755	0.116273	0.154777	0.202803	0.135454	0.0969098	0.583936	0.0716394	0.055152	0.0451273	0.115394	0.344901	0.314538	0.105215	0.0808768	0.316327	0.111551	0.0817851	0.383408	0.0584326	0.18975	0.181186	0.318549	0.0907126	0.0475979	0.181406	0.0965551	0.0623294	0.244898	0.465848	0.0868896	0.175488	0.133812	0.0409354	0.270308	0.604419	0.0768075	0.526581	0.461899
ELF001A_282	0.789715	0.3118	1.35537	0.668503	0.355372	0.610633	0.608692	0.355372	0.999008	1.35537	0.355372	0.133716	0.173129	0.22	0.150123	0.117927	0.566591	0.0880742	0.0677733	0.070075	0.135165	0.332437	0.367068	0.086685	0.0658096	0.309917	0.115413	0.0812922	0.459029	0.0779056	0.204895	0.164082	0.300018	0.0778099	0.0672292	0.123049	0.075081	0.0776094	0.284349	0.446186	0.104449	0.177702	0.15086	0.0347862	0.244932	0.539746	0.0547655	0.434749	0.401725
ELF001A_247	0.820862	0.367588	1.26531	0.725624	0.265306	0.775424	0.769123	0.265306	0.945306	1.26531	0.265306	0.701037	0.785344	0.89506	0.75297	0.629297	0.51036	0.557573	0.504389	0.263859	0.312673	0.249092	0.154401	0.363719	0.49811	0.622449	0.728063	0.540288	0.164749	0.555064	0.870592	0.26602	0.348481	0.32151	0.290512	0.630385	0.322678	0.516654	0.171556	0.495002	0.585791	0.291013	0.748882	0.38737	0.42227	0.629175	0.432697	0.544399	0.41192
ELF001A_212	1.29342	0.738413	1.74489	1.26209	0.753675	1.22926	1.22734	0.753675	1.43367	1.75367	0.753675	0.00514201	0.00315036	0.0111894	0.00245921	0.00645986	0.924744	0.0253925	0.0423143	0.198068	0.292069	0.628925	0.741151	0.32302	0.0996953	0.387623	0.0109652	0.059881	0.761731	0.022137	0.00871903	0.428359	0.723793	0.302284	0.162652	0.15508	0.274561	0.0393534	0.628898	0.75963	0.0212019	0.501509	0.00159945	0.155528	0.638179	1.12385	0.239672	1.01402	0.894357
ELF001A_167	0.990716	0.490627	1.46828	0.900285	0.49352	0.877603	0.875585	0.49352	1.1732	1.49352	0.49352	0.0371378	0.0591475	0.0921947	0.0472226	0.0245551	0.679233	0.0161971	0.012428	0.0662176	0.154154	0.415296	0.442008	0.153177	0.0526103	0.307401	0.0366287	0.0349316	0.485832	0.00798306	0.083596	0.235475	0.443692	0.135861	0.0541503	0.134775	0.129702	0.0165257	0.353973	0.54127	0.0232437	0.267938	0.0448242	0.0483971	0.382496	0.778187	0.107604	0.685345	0.594493
ELF001A_149	0.555556	0.12426	1	0.555556	0	0.510118	0.508705	0	0.68	1	0	0.700936	0.795805	0.905804	0.754929	0.64793	0.316482	0.552203	0.490079	0.270713	0.208365	0.19957	0.211988	0.288889	0.407407	0.5	0.712107	0.473395	0.239093	0.56753	0.873797	0.129566	0.235556	0.231529	0.267077	0.555556	0.1888	0.502077	0.223214	0.276343	0.584656	0.26056	0.764347	0.331728	0.334515	0.4187	0.345795	0.293676	0.162441
ELF001A_138	0.606809	0.265584	1.1798	0.450354	0.184919	0.414972	0.411931	0.184919	0.864663	1.18492	0.184919	0.71238	0.82246	0.940544	0.781716	0.679948	0.325311	0.540858	0.471285	0.210166	0.283535	0.235102	0.07433	0.246828	0.478435	0.613703	0.732868	0.544928	0.242382	0.559641	0.917084	0.200411	0.188852	0.219381	0.259046	0.646705	0.22861	0.49104	0.144414	0.409705	0.572983	0.178476	0.794211	0.322118	0.230613	0.229825	0.272472	0.248998	0.215358
ELF001A_126	0.554925	0.24289	1.22418	0.330118	0.224175	0.260431	0.260662	0.224175	0.880919	1.08464	0.224175	0.511918	0.594157	0.681485	0.547836	0.47849	0.468442	0.400251	0.339859	0.182546	0.223791	0.288167	0.213181	0.102211	0.309877	0.491617	0.473703	0.358681	0.363838	0.380526	0.653738	0.155838	0.127948	0.104119	0.214978	0.430894	0.137161	0.365747	0.166659	0.394918	0.437052	0.095592	0.548995	0.162742	0.0993881	0.218642	0.126121	0.130905	0.161991
ELF001A_120	0.857331	0.319527	1.30178	0.857331	0.301775	0.785594	0.801137	0.301775	0.981775	1.30178	0.301775	0.48786	0.548976	0.621154	0.522404	0.454722	0.557528	0.401273	0.367012	0.286979	0.273266	0.387305	0.451511	0.34451	0.31602	0.41716	0.499197	0.305939	0.472972	0.411985	0.598448	0.214146	0.373228	0.296241	0.251323	0.447074	0.219806	0.371879	0.416473	0.474508	0.420372	0.390735	0.529523	0.302205	0.488784	0.708654	0.347535	0.592248	0.453451
ELF001A_104	0.603194	0.205071	1.10824	0.495968	0.136217	0.452084	0.447575	0.136217	0.814818	1.13622	0.136217	0.588399	0.678346	0.784226	0.639166	0.532225	0.383873	0.449206	0.390284	0.156919	0.202502	0.196008	0.063785	0.176621	0.352482	0.50335	0.592603	0.417382	0.134319	0.43982	0.757369	0.12222	0.156388	0.155572	0.191876	0.512285	0.167115	0.406739	0.0664742	0.357615	0.48279	0.123233	0.637902	0.236266	0.203519	0.351837	0.243649	0.275229	0.209522
ELF001A_95	0.736958	0.310707	1.27976	0.654991	0.296157	0.63015	0.629807	0.296157	0.976157	1.29616	0.296157	0.123047	0.164117	0.216041	0.142122	0.099774	0.510396	0.0699562	0.0486197	0.03528	0.0933846	0.243061	0.30742	0.0681059	0.0487374	0.279764	0.114673	0.062175	0.374368	0.0643391	0.20081	0.115854	0.282532	0.0601002	0.0277009	0.163188	0.0508586	0.0574061	0.236328	0.401373	0.084	0.159377	0.142017	0.0214697	0.243976	0.547071	0.0547841	0.454105	0.380167
ELF002_325	0.57055	0.434881	1.32872	0.139177	0.446367	0.0213411	0.0226513	0.446367	1.12637	1.44637	0.446367	1.09489	1.21646	1.33989	1.14709	1.04242	0.680805	0.921079	0.826105	0.496473	0.600577	0.536791	0.25026	0.288197	0.781879	0.946367	1.01409	0.868781	0.534499	0.8724	1.30292	0.414456	0.132903	0.329767	0.598505	1.00192	0.442226	0.866411	0.217375	0.655483	0.982875	0.167215	1.14029	0.487077	0.0913538	0.041712	0.365211	0.0618931	0.238031
ELF002_314	0.693333	0.683691	1.68593	0.13037	0.685926	0.0401081	0.0421173	0.685926	1.36593	1.68593	0.685926	1.3191	1.44897	1.57402	1.37205	1.27478	0.88194	1.13744	1.03323	0.690111	0.829388	0.754441	0.422651	0.414815	1.00198	1.18593	1.21682	1.09438	0.792593	1.08113	1.53704	0.615056	0.245926	0.486344	0.813531	1.24148	0.636504	1.08188	0.386422	0.877008	1.20459	0.288977	1.36569	0.655368	0.162908	0.05284	0.487467	0.129665	0.387855
ELF002_289	0.852646	0.522166	1.42588	0.754161	0.425878	0.694931	0.689755	0.425878	1.10588	1.42588	0.425878	1.05813	1.17071	1.30334	1.12528	0.981488	0.655937	0.879702	0.805799	0.44381	0.547663	0.505666	0.123808	0.508706	0.800457	0.914514	1.0759	0.870612	0.193554	0.853613	1.27332	0.456959	0.355373	0.474556	0.524273	0.966282	0.531042	0.825334	0.167305	0.66929	0.925682	0.33086	1.11898	0.601714	0.430586	0.559002	0.603331	0.518534	0.473357
ELF002_275	1.05556	0.62426	1.5	0.722222	0.5	1.01012	1.00186	0.5	1.18	1.5	0.5	1.19599	1.28395	1.39845	1.23922	1.12309	0.816482	1.03643	0.968477	0.75261	0.652809	0.673929	0.701293	0.722222	0.796296	0.5	1.18938	0.851173	0.718685	1.05546	1.36594	0.551134	0.602222	0.695165	0.692908	1.05556	0.6288	0.983369	0.674107	0.766139	1.06203	0.724157	1.23667	0.788366	0.803746	0.892345	0.828688	0.788303	0.621624
ELF002_263	1.55556	0.970414	2	1.55556	1	1.51012	1.50871	1	1.68	2	1	0.0326194	0.0135824	0.00286332	0.0201993	0.0454458	1.15859	0.0834336	0.114742	0.345619	0.44646	0.840595	1.01234	0.488889	0.185185	0.5	0.0393802	0.128951	1.02481	0.0822819	0.00468737	0.619762	0.968889	0.467893	0.29521	0.222222	0.4288	0.107519	0.879464	0.970221	0.0719151	0.713782	0.0204021	0.279026	0.85979	1.40534	0.376122	1.28696	1.15661
ELF002_253	1.55556	1.12426	2	1.55556	1	1.51012	1.50528	1	1.68	2	1	1.60193	1.73655	1.86757	1.71304	1.63551	0.921745	1.38438	1.31546	1.07471	1.14487	1.14363	0.976694	1.28889	1.40741	1.5	1.71211	1.4734	1.23399	1.49892	1.85809	1.12957	1.23556	1.19517	1.10339	1.55556	1.1088	1.32521	1.22321	1.25594	1.39485	1.24964	1.76435	1.29971	1.32792	1.08685	1.19961	1.23592	1.12162
ELF002_229	1.11111	0.577252	1.55556	1.11111	0.555556	1.06567	1.06198	0.555556	1.23556	1.55556	0.555556	0.124479	0.149879	0.190772	0.142363	0.102037	0.731687	0.0945097	0.0927394	0.106751	0.224238	0.476959	0.40866	0.266667	0.148148	0.388889	0.149481	0.132654	0.415397	0.0851177	0.18328	0.319108	0.524444	0.232539	0.104815	0.222222	0.224356	0.0916458	0.34871	0.627817	0.10121	0.336077	0.138818	0.148569	0.494466	0.926248	0.230019	0.835352	0.704391
ELF002_206	1.11111	0.577252	1.55556	0.888889	0.555556	1.06567	1.06027	0.555556	1.23556	1.55556	0.555556	0.14263	0.156298	0.188811	0.145854	0.126881	0.766774	0.118905	0.114942	0.197887	0.229529	0.506485	0.627318	0.266667	0.148148	0.388889	0.13736	0.11784	0.641587	0.125002	0.181534	0.319108	0.613333	0.262842	0.161081	0.222222	0.237689	0.122258	0.52877	0.627817	0.11837	0.43922	0.138818	0.161911	0.559301	0.959903	0.245052	0.842516	0.708278
ELF009_330	1.55556	1.12426	2	1.55556	1	1.51012	1.50871	1	1.68	2	1	1.69599	1.7958	1.9058	1.75493	1.64793	1.31648	1.5522	1.48648	1.26447	1.19249	1.19957	1.21199	1.15556	1.2963	1.5	1.71211	1.4734	1.23909	1.56576	1.8738	1.09035	1.23556	1.23153	1.24662	1.55556	1.1888	1.49868	1.22321	1.27634	1.57374	1.25765	1.76435	1.32773	1.32902	1.41722	1.3388	1.29368	1.15661
ELF009_315	0.555556	0.12426	1	0.555556	0	0.510118	0.508705	0	0.68	1	0	0.700936	0.795805	0.905804	0.754929	0.64793	0.316482	0.552203	0.490079	0.270713	0.208365	0.19957	0.211988	0.288889	0.407407	0.5	0.712107	0.473395	0.239093	0.56753	0.873797	0.129566	0.235556	0.231529	0.267077	0.555556	0.1888	0.502077	0.223214	0.276343	0.584656	0.26056	0.764347	0.331728	0.334515	0.4187	0.345795	0.293676	0.162441
ELF009_265	0.666667	0.406312	1.33333	0.444444	0.333333	0.376214	0.375543	0.333333	1.01333	1.33333	0.333333	1.00952	1.11778	1.23228	1.06034	0.948137	0.614728	0.851047	0.773007	0.509165	0.509952	0.476959	0.377763	0.4	0.62963	0.5	0.972713	0.714136	0.535011	0.836804	1.19491	0.358324	0.213333	0.386074	0.518569	0.888889	0.3888	0.792326	0.349702	0.56886	0.897015	0.325479	1.06538	0.516518	0.320962	0.325901	0.462177	0.28002	0.285862
ELF009_235	1.05556	0.547337	1.5	1.05556	0.5	1.01012	1.00785	0.5	1.18	1.5	0.5	0.364303	0.40099	0.454334	0.384074	0.315632	0.724377	0.310247	0.29431	0.299427	0.327412	0.137798	0.608601	0.388889	0.296296	0.5	0.375744	0.301173	0.629399	0.322316	0.436625	0.335448	0.602222	0.345165	0.255568	0.388889	0.2888	0.296294	0.549107	0.623282	0.317365	0.476978	0.392374	0.30004	0.591109	0.911647	0.348128	0.789646	0.659525
ELF009_180	1.55556	0.970414	2	1.55556	1	1.51012	1.50871	1	1.68	2	1	0.0326194	0.0135824	0.00286332	0.0201993	0.0454458	1.15859	0.0834336	0.114742	0.345619	0.44646	0.840595	1.01234	0.488889	0.185185	0.5	0.0393802	0.128951	1.02481	0.0822819	0.00468737	0.619762	0.968889	0.467893	0.29521	0.222222	0.4288	0.107519	0.879464	0.970221	0.0719151	0.713782	0.0204021	0.279026	0.85979	1.40534	0.376122	1.28696	1.15661
ELF009_140	1.55556	0.970414	2	1.55556	1	1.51012	1.50871	1	1.68	2	1	0.0326194	0.0135824	0.00286332	0.0201993	0.0454458	1.15859	0.0834336	0.114742	0.345619	0.44646	0.840595	1.01234	0.488889	0.185185	0.5	0.0393802	0.128951	1.02481	0.0822819	0.00468737	0.619762	0.968889	0.467893	0.29521	0.222222	0.4288	0.107519	0.879464	0.970221	0.0719151	0.713782	0.0204021	0.279026	0.85979	1.40534	0.376122	1.28696	1.15661
ELF009_90	0.909722	0.446376	1.4375	0.743056	0.4375	0.772404	0.7702	0.4375	1.1175	1.4375	0.4375	0.0858372	0.112008	0.15029	0.0946975	0.0652439	0.63885	0.0537412	0.0421156	0.0882064	0.151817	0.295578	0.458311	0.126389	0.0671296	0.3125	0.0711983	0.0553395	0.525445	0.0491741	0.138522	0.199418	0.406389	0.121302	0.0683877	0.159722	0.1113	0.0505461	0.364397	0.509762	0.0619372	0.252938	0.0928502	0.0477469	0.340696	0.690461	0.0899633	0.597697	0.524868
ELF009_70	1.55556	0.970414	2	1.55556	1	1.51012	1.50871	1	1.68	2	1	0.0326194	0.0135824	0.00286332	0.0201993	0.0454458	1.15859	0.0834336	0.114742	0.345619	0.44646	0.840595	1.01234	0.488889	0.185185	0.5	0.0393802	0.128951	1.02481	0.0822819	0.00468737	0.619762	0.968889	0.467893	0.29521	0.222222	0.4288	0.107519	0.879464	0.970221	0.0719151	0.713782	0.0204021	0.279026	0.85979	1.40534	0.376122	1.28696	1.15661
ELF007_204	0.871086	0.44534	1.32707	0.819138	0.327074	0.770962	0.745422	0.327074	1.00707	1.32707	0.327074	0.972676	1.07636	1.20396	1.03826	0.899717	0.580102	0.803726	0.737509	0.420103	0.462327	0.45411	0.176953	0.517839	0.701773	0.753481	1.00337	0.765741	0.194756	0.797222	1.17512	0.393996	0.394087	0.462696	0.462465	0.865314	0.46306	0.751891	0.219893	0.58884	0.839996	0.385717	1.03474	0.573048	0.51348	0.657172	0.607271	0.582769	0.457659
ELF007_188	0.950782	0.521327	1.39762	0.901918	0.398643	0.897292	0.889089	0.398643	1.07864	1.39864	0.398643	1.02197	1.14339	1.27618	1.11317	1.00046	0.467263	0.821157	0.752615	0.458101	0.533477	0.525671	0.260786	0.627802	0.796768	0.888392	1.09884	0.863513	0.402828	0.876567	1.25861	0.494179	0.541529	0.558158	0.503105	0.950782	0.525609	0.765041	0.418908	0.661639	0.844506	0.533356	1.13629	0.667132	0.643607	0.592696	0.633603	0.645656	0.524721
ELF007_165	0.912516	0.481877	1.35838	0.863203	0.359805	0.858203	0.848315	0.359805	1.03924	1.35981	0.359805	0.982083	1.10122	1.23348	1.07043	0.954715	0.447999	0.784745	0.716703	0.419295	0.492858	0.485327	0.215966	0.583734	0.755359	0.848425	1.05459	0.820856	0.342915	0.833236	1.21491	0.451717	0.496451	0.516059	0.465051	0.906826	0.488264	0.729355	0.362158	0.623607	0.809312	0.484901	1.09028	0.624198	0.598857	0.572585	0.599416	0.61135	0.488675
ELF007_129	0.803783	0.344035	1.26543	0.67045	0.265432	0.727796	0.716012	0.265432	0.945432	1.26543	0.265432	0.518396	0.591511	0.687422	0.562938	0.46199	0.494308	0.397649	0.352944	0.161701	0.218497	0.310283	0.129125	0.255826	0.357427	0.507367	0.538536	0.387142	0.141556	0.390855	0.667113	0.207774	0.300557	0.222943	0.188247	0.485504	0.233845	0.366148	0.124879	0.445001	0.422674	0.217207	0.555931	0.260574	0.348107	0.596434	0.314077	0.515043	0.391984
ELF007_108	0.579494	0.477785	1.45616	0.139552	0.461951	0.045034	0.0450447	0.461951	1.14195	1.46195	0.461951	1.10862	1.23054	1.3527	1.15969	1.05056	0.696287	0.93629	0.840758	0.520227	0.604826	0.43398	0.29369	0.303566	0.794588	0.960504	1.02718	0.876864	0.567432	0.89063	1.31461	0.405257	0.151053	0.338659	0.612018	1.01558	0.45023	0.883089	0.254514	0.636933	0.997619	0.186309	1.15596	0.498169	0.105078	0.0557491	0.374554	0.0735895	0.248826
ELF007_97.5	1.44704	0.87384	1.89492	1.43802	0.897733	1.39523	1.3938	0.897733	1.57752	1.89752	0.897733	0.0172071	0.00468792	0.000742939	0.00837293	0.0263382	1.06291	0.0568991	0.0826681	0.287245	0.381734	0.753678	0.91158	0.419036	0.144395	0.450507	0.0231323	0.0964574	0.927299	0.0555947	0.00075451	0.539899	0.871854	0.399837	0.240847	0.190112	0.363337	0.0770191	0.785729	0.881597	0.0479302	0.630946	0.00863997	0.227164	0.771672	1.29192	0.318559	1.1754	1.04868
ELF007_94.5	1.31997	0.759253	1.77323	1.3059	0.77426	1.26523	1.26364	0.77426	1.45323	1.77392	0.77426	0.00690192	0.00274463	0.00756173	0.0028631	0.0108925	0.948225	0.0322858	0.0511952	0.221939	0.307377	0.646741	0.791887	0.342622	0.101629	0.395118	0.0130795	0.0640266	0.808992	0.0313663	0.00524725	0.446378	0.759721	0.323867	0.179924	0.156596	0.288684	0.0472522	0.676046	0.776223	0.0263749	0.537112	0.00348239	0.171938	0.672992	1.16207	0.257331	1.04689	0.921739
ELF007_91.5	1.42829	0.856371	1.87633	1.41977	0.879108	1.37555	1.3741	0.879108	1.55862	1.87859	0.879108	0.0153111	0.00397414	0.00117257	0.00712993	0.0238577	1.04603	0.0531404	0.0779579	0.278313	0.370943	0.737562	0.896105	0.407819	0.137291	0.441624	0.0211658	0.091249	0.91237	0.0520197	0.000800493	0.526212	0.855833	0.388821	0.232155	0.184221	0.351653	0.0724717	0.771508	0.866099	0.0445611	0.618043	0.00757848	0.219081	0.757671	1.27281	0.309317	1.15617	1.02975
ELF007_85	1.08781	0.548166	1.52884	1.06388	0.549349	1.02142	1.01985	0.549349	1.21909	1.54935	0.549349	0.0203285	0.034111	0.0582004	0.0267551	0.0128869	0.731148	0.0137582	0.0180523	0.111704	0.185878	0.448638	0.555697	0.223537	0.0559018	0.316016	0.0279367	0.0306644	0.577427	0.0130951	0.0511233	0.279116	0.551059	0.194444	0.0843912	0.123708	0.168098	0.0175692	0.46478	0.589376	0.0155733	0.365299	0.0271019	0.0886719	0.493056	0.916238	0.1615	0.805547	0.685805
ELF020_250	1.07306	0.660793	1.50073	0.997587	0.563625	0.959245	0.94832	0.563625	1.24362	1.55105	0.563625	1.21443	1.3256	1.46299	1.28582	1.13194	0.790236	1.03	0.959449	0.582271	0.691427	0.659516	0.233073	0.70157	0.961948	1.06362	1.25063	1.02968	0.266522	1.00962	1.43495	0.614512	0.545931	0.655474	0.66184	1.11918	0.701356	0.975298	0.294813	0.83278	1.07262	0.511382	1.27744	0.779343	0.649132	0.803516	0.806116	0.757838	0.657452
ELF020_220	0.888889	0.970414	2	0.222222	1	0.108408	0.114351	1	1.68	2	1	1.63163	1.76469	1.88816	1.67814	1.58582	1.21122	1.45252	1.34066	0.988565	1.14487	1.05505	0.709314	0.622222	1.2963	1.5	1.49393	1.39562	1.13705	1.37586	1.84762	0.894271	0.435556	0.722438	1.12897	1.55556	0.9088	1.39663	0.638393	1.1743	1.52849	0.490993	1.66746	0.904777	0.312537	0.176681	0.702716	0.267484	0.608505
ELF020_188	0.962222	0.633491	1.54	0.828889	0.54	0.769776	0.768637	0.54	1.22	1.54	0.54	1.22361	1.3244	1.44228	1.27468	1.13203	0.817008	1.06167	0.988855	0.742048	0.735666	0.175467	0.646462	0.695556	0.925185	1.04	1.20847	0.99784	0.755113	1.06552	1.4049	0.567605	0.615556	0.663347	0.74365	1.09556	0.6448	1.00908	0.643125	0.795935	1.09813	0.632377	1.28497	0.778866	0.661658	0.709776	0.739217	0.627497	0.591654
ELF020_165	0.675556	0.192978	1.12	0.586667	0.12	0.605046	0.590952	0.12	0.8	0.986667	0.12	0.477372	0.551854	0.643059	0.520304	0.435839	0.394377	0.364065	0.31689	0.170155	0.127307	0.227884	0.224561	0.204444	0.260741	0.42	0.489077	0.311173	0.216576	0.374022	0.61823	0.108389	0.275556	0.164862	0.161331	0.408889	0.1328	0.332054	0.204821	0.276615	0.386888	0.22985	0.52264	0.212102	0.329533	0.521526	0.259108	0.381708	0.228019
ELF020_139	0.81483	0.41387	1.31561	0.608257	0.315612	0.707275	0.700388	0.315612	0.995612	1.31561	0.315612	0.839167	0.933681	1.05356	0.894644	0.76216	0.557594	0.677812	0.613833	0.324082	0.389168	0.397712	0.129417	0.371637	0.589999	0.731105	0.852431	0.658804	0.171405	0.665168	1.02799	0.324216	0.329571	0.361225	0.375276	0.758491	0.396243	0.633153	0.149113	0.557463	0.71295	0.285089	0.884628	0.451002	0.396637	0.566689	0.481003	0.506563	0.41186
ELF020_111	0.577778	0.201183	1.13333	0.4	0.133333	0.394448	0.38347	0.133333	0.813333	1.13333	0.133333	0.581794	0.673434	0.779628	0.63195	0.524949	0.383149	0.442719	0.381528	0.149531	0.168153	0.198171	0.0588089	0.146667	0.337037	0.466667	0.578168	0.395988	0.115624	0.431952	0.752157	0.103422	0.12	0.124559	0.179779	0.511111	0.1488	0.402644	0.0470238	0.29267	0.478346	0.0945123	0.630091	0.210225	0.167153	0.310855	0.219253	0.239232	0.175852
ELF020_85	0.901572	0.438447	1.41498	0.832607	0.414982	0.869692	0.863689	0.414982	1.09498	1.41498	0.414982	0.0766558	0.100391	0.13742	0.087044	0.0626982	0.628923	0.0478773	0.0399817	0.0956995	0.135662	0.381934	0.48154	0.156745	0.0522746	0.294293	0.074425	0.0446991	0.512801	0.0503955	0.127017	0.206481	0.457434	0.147765	0.066661	0.142952	0.118265	0.0451377	0.394662	0.4978	0.0520882	0.303927	0.085426	0.0678667	0.411983	0.778976	0.131561	0.667251	0.547665
ELF020_64	0.675556	0.24426	1.2	0.462222	0.2	0.539177	0.535292	0.2	0.88	1.12	0.2	0.283906	0.342057	0.415569	0.312416	0.247185	0.437535	0.195131	0.157586	0.0663681	0.0858251	0.203393	0.213057	0.0782222	0.14963	0.34	0.273562	0.166728	0.261746	0.191605	0.395892	0.0770165	0.216889	0.0635289	0.0678954	0.275556	0.064	0.173913	0.1575	0.318792	0.215961	0.128299	0.308568	0.0720615	0.209021	0.450563	0.105298	0.357799	0.258884
ELF020_30	0.550113	0.235652	1.20572	0.314819	0.205719	0.27058	0.269135	0.205719	0.885719	1.19667	0.205719	0.491004	0.578021	0.673394	0.533507	0.444132	0.4295	0.367934	0.309337	0.102888	0.170494	0.211267	0.0557234	0.0674581	0.293116	0.450062	0.466386	0.3357	0.171483	0.342293	0.647105	0.102208	0.0545471	0.055491	0.149631	0.459615	0.106374	0.332853	0.0177337	0.32406	0.407287	0.011021	0.530462	0.128531	0.0501586	0.200201	0.109	0.158867	0.165542
ELF027_177	0.84589	0.478487	1.33405	0.343157	0.399624	0.673227	0.66648	0.399624	1.07962	1.39962	0.399624	1.02987	1.11749	1.23301	1.06884	0.959376	0.688064	0.865919	0.791254	0.565099	0.523679	0.430979	0.497296	0.472119	0.748743	0.866837	0.993549	0.789959	0.584184	0.869699	1.20373	0.414757	0.490917	0.49151	0.576809	0.911463	0.511047	0.823971	0.467832	0.648198	0.896873	0.485257	1.0571	0.581306	0.519979	0.600511	0.58508	0.515075	0.455388
ELF027_174	1.20393	0.660724	1.6628	1.16309	0.666324	1.13814	1.13607	0.666324	1.34628	1.66609	0.666324	0.00928466	0.0129665	0.0278131	0.00950635	0.0034459	0.8454	0.018108	0.0296474	0.162952	0.247776	0.511526	0.6713	0.277572	0.0791789	0.355389	0.0140551	0.0457897	0.695512	0.0166294	0.0231175	0.364157	0.652144	0.256353	0.12711	0.140555	0.226298	0.0280028	0.565519	0.691081	0.015695	0.444496	0.00942784	0.124624	0.575381	1.03473	0.202247	0.924941	0.806734
ELF027_160	0.967417	0.566361	1.46455	0.812402	0.467586	0.868515	0.864503	0.467586	1.14759	1.46759	0.467586	1.0243	1.10895	1.21681	1.06807	0.936223	0.745354	0.878532	0.817342	0.623023	0.595114	0.120412	0.612667	0.617671	0.767091	0.887039	1.02062	0.818894	0.668088	0.892591	1.18447	0.472234	0.61763	0.58342	0.60412	0.915746	0.546417	0.834715	0.60123	0.708324	0.904769	0.602982	1.07475	0.662029	0.668343	0.785107	0.663384	0.678495	0.582299
ELF022_140	0.222222	1.12426	2	1.55556	1	1.51012	1.50871	1	1.68	2	1	1.70094	1.79432	1.9058	1.75493	1.64793	1.31648	1.5522	1.49008	1.26946	1.20836	1.19025	1.21199	1.28889	1.40741	1.5	1.71211	1.46228	1.23909	1.56715	1.8738	1.12957	1.23556	1.23153	1.26196	1.55556	1.1888	1.50208	1.21875	1.27634	1.58466	1.26056	1.76435	1.33173	1.30045	1.41722	1.34346	1.29368	1.04582
Table S7 Pairwise distances between guild structures of samples by difference in sum of squares (values 0-2).
[truncated: 220 more columns]
