# Supplementary material for: Pleistocene-Holocene sedaDNA reconstruction of Southern Doggerland reveals early colonization before inundation consistent with northern refugia.
Source: Research Square preprint supplement (doi:10.21203/rs.3.rs-3296992/v1), 2023-09-21
Supplement: Supplementary file 2 [file 1263de80c6fb468079153137.xlsx]

## Sheet: Sheet1
		cl	cs	∂xloc	∂xsed	∂sed1-2	id	(1+e1)	(1+e2)	∂1	∂2	fit	N1	N2	ratio (∂2/∂1)
sediment combinations
	all sediments	0.96	0.04	0.2	0.0098408	0.0913459	1.87	1.2723	1.558	0.209873	0.291391	8.23294e-05	75	44	1.38842
	silts	0.97	0.03	0.18	0.0108608	0.0598703	1.73	1.33002	0.266904	0.190854	0.239863	2.17401e-05	47	24	1.25679
	sands	0.95	0.05	0.24	0.0116161	0.101786	1.93	0.733533	1.09545	0.251616	0.341785	4.20118e-06	26	19	1.35836
	clay silts	0.95	0.05	0.16	0.0135133	0.0212527	1.97	1.52522	0.856626	0.173509	0.181246	2.2171e-05	25	11	1.04459
	non clay silts	0.89	0.11	0.18	0.0305579	0.109452	1.99	0.315365	1.05344	0.210564	0.289462	2.11651e-05	22	13	1.3747
	laminated silts	0.98	0.02	0.19	0.00565666	0.070191	1.93	1.33636	1.23312	0.195666	0.260202	2.95272e-05	40	17	1.32983
	unstructured silts	0.97	0.03	0.08	0.00258727	0.0581874	1.99	0.266462	1.67071	0.0825778	0.13817	4.73707e-05	2	4	1.67321
	fine sand	0.98	0.02	0.15	0.00572754	0.0556668	1.91	1.72183	1.51653	0.155721	0.20566	2.69694e-05	17	11	1.3207
	medium sand	0.85	0.15	0.15	0.0427029	0.449637	1.8	1.18562	1.59336	0.192689	0.599594	6.7098e-05	4	5	3.11172
	coarse sand	0.3	0.7	0.24	0.943311	0.256651	1.93	0.311406	1.64073	1.1833	0.496662	4.10241e-05	4	3	0.419728
	laminated sands	0.83	0.17	0.1	0.0275106	0.230346	1.97	0.718153	1.12832	0.127505	0.330337	5.4194e-05	16	7	2.59077
	unstructured sands	0.34	0.66	0.27	0.203204	0.0998261	1.87	0.226745	0.292896	0.473194	0.369821	2.26557e-05	10	12	0.781542
	fine sands (unstructured)	0.37	0.63	0.13	0.19223	0.0931275	1.92	1.24472	1.86884	0.32225	0.223136	4.63221e-05	4	5	0.692431
	medium and coarse sands (unstructured)	0.33	0.67	0.12	0.453828	0.354602	0.46	1.40179	1.63653	0.573823	0.474596	1.52178e-05	6	7	0.827077
Individual sediment types
	brown clay laminated silt	0.99	0.01	0.12	0.00161365	0.0302002	1.99	0.62686	1.70487	0.121608	0.150192	2.55522e-05	4	5	1.23505
	grey clay laminated silt	0.91	0.09	0.18	0.0053876	0.013975	1.8	1.5815	0.727619	0.185387	0.193977	1.75147e-05	20	5	1.04634
	brown clay silt unstructured	0.93	0.07	0.13	0.0135586	0.142884	1.73	1.6593	1.52047	0.143546	0.272863	6.11584e-05	1	1	1.90088
	brown laminated silt	0.95	0.05	0.22	0.0144878	0.179278	1.89	1.22058	1.14354	0.234479	0.399265	3.23636e-05	11	6	1.70278
	grey laminated silt	0.79	0.21	0.06	0.00572305	0.25203	1.99	1.25687	0.13954	0.065705	0.311936	0.000233343	5	3	4.74753
	dark grey laminated silt	0.29	0.71	0.07	0.270624	0.0818087	0.1	1.95171	1.4969	0.340603	0.151796	4.47119e-05	5	1	0.445668
	brown grey silt unstructured	0.94	0.06	0.02	0.00161088	0.073276	1.81	1.14644	1.13104	0.0216098	0.0932721	3.38831e-05	1	3	4.31619
	brown grey sand fine	0.41	0.59	0.11	0.29255	0.0133322	1.98	0.953844	1.79048	0.402571	0.123333	3.59486e-05	3	2	0.306364
	grey sand fine	0.9	0.1	0.07	0.0112846	0.219656	1.75	1.39761	1.79586	0.0812874	0.289672	8.5035e-05	1	3	3.56355
	grey sand medium	0.45	0.55	0.11	0.131719	-0.0283687	1.93	1.14438	1.8513	0.241722	0.0816262	3.20457e-05	1	2	0.337687
	brown/green sand medium	nd	nd	nd	nd	nd	nd	nd	nd	0.00292078	0.834466	nd	1	2	285.7
	grey sand coarse	0.02	0.98	0.03	1.39504	0.0351468	1.34	1.736	1.85375	1.42526	0.065051	0.000391345	1	1	0.0456415
	dark grey sand coarse	0.49	0.51	0.32	0.621331	0.392461	1.91	1.2496	1.23536	0.94133	0.712468	1.40392e-05	1	2	0.756873
	brown grey sand fine laminated	0.97	0.03	0.1	0.00538723	0.0942591	1.99	0.595118	0.130126	0.105389	0.19427	7.87123e-05	6	4	1.84336
	grey sand fine laminated	0.8	0.2	0.09	0.00598306	0.0947581	1.99	0.563603	1.50511	0.0959761	0.184748	4.90087e-05	7	2	1.92493
	grey sand medium laminated	0.67	0.33	0.17	0.0930507	0.995777	1.94	1.71186	1.34417	0.263056	1.16578	7.26505e-05	2	1	4.4317
	grey brown peat	0.52	0.48	0.04	0.0615708	0.0454922	0.08	1.77222	1.34657	0.10156	0.0854847	3.31602e-05	2	1	0.841715
Table S10. Local and influxing sediment contributions to sedaDNA signal
