# Supplementary material for: Pleistocene-Holocene sedaDNA reconstruction of Southern Doggerland reveals early colonization before inundation consistent with northern refugia.
Source: Research Square preprint supplement (doi:10.21203/rs.3.rs-3296992/v1), 2023-09-21
Supplement: Supplementary file 3 [file 2de54ef076fef043cf93e597.xlsx]

## Sheet: Table S11a 14C
Core	Type	Calibration	Core elevation	Depth (CM)	Depth mean (m)	Depth (calc)	Mean depth (cm)	Age	range +/-	Age type	Cal bp max	Cal bp min	mid	Consistent	Weighted mean	Weighted mean cal BP
ELF001A	Shell	Marine13	-24.7	140-145	1.425	-26.125	142.5	8340	30	BP	9258	8935	9096.5
ELF002	Shell	Marine13	-23.35	252-254	2.53	-25.88	253	8455	30	BP	9259	8935	9097
ELF002	Shell	Marine13	-23.35	265-267	2.66	-26.01	266	8400	30	BP	9374	8592	8983
ELF002	Peat	IntCal13	-23.35	283-285	2.84	-26.19	284	8010	30	BP	9007	8774	8890.5
ELF002	Peat: Humic acid	IntCal13	-23.35	285	2.85	-26.2	285	8075	29	BP	9090	8794	8942	Yes	8035±21	9015-8780 cal BP
ELF002	Peat: Humin	IntCal13	-23.35	285	2.85	-26.2	285	7995	29	BP	9000	8728	8864	T'=3.8; T'(5%)=3.8; v=1
ELF002	Peat	IntCal13	-23.35	290-292	2.91	-26.26	291	7950	30	BP	8980	8649	8814.5
ELF002	Peat: Humic acid	IntCal13	-23.35	295	2.95	-26.3	295	8186	29	BP	9255	9027	9141	Yes	8204±21	9269-9033 cal BP
ELF002	Peat: Humin	IntCal13	-23.35	295	2.95	-26.3	295	8211	29	BP	9280	9032	9156	T'=0.7; T'(5%)=3.8; v=1
ELF002	Peat	IntCal13	-23.35	305-307	3.06	-26.41	306	9130	30	BP	10385	10227	10306
ELF002	Peat: Humic acid	IntCal13	-23.35	307	3.07	-26.42	307	10384	29	BP	12400	12090	12245	No	N/A	N/A
ELF002	Peat: Humin	IntCal13	-23.35	307	3.07	-26.42	307	10870	29	BP	12794	12696	12745	T'=140.2; T'(5%)=3.8; v=1
ELF003	Shell (marine)	Marine13	-22.93	211-212	2.115	-25.045	211.5	8400	30	BP	9374	8592	8983
ELF003	Peat	IntCal13	-22.93	266-268	2.67	-25.6	267	8500	30	BP	9535	9475	9505
ELF003	Shell (marine)	Marine13	-22.93	314-316	3.15	-26.08	315	8350	30	BP	9315	8533	8924
ELF003	Shell: articulated bivalve	Marine13	-22.93	129-130	1.295	-24.225	129.5	8380	30	BP	9140	8740	8940
ELF005	Peat: humic acid dated	IntCal13	-20.89	62	0.62	-21.51	62	8184	30	BP	9255	9056	9155.5	Yes	8200±22	9264-9032 cal BP
ELF005	Peat: humin fraction	IntCal13	-20.89	62	0.62	-21.51	62	8215	30	BP	9055	9032	9043.5	T'=0.5; T'(5%)=3.8; v=1
ELF005	Peat: Humic acid	IntCal13	-20.89	64	0.64	-21.53	64	8192	29	BP	9257	9030	9143.5	No	N/A	N/A
ELF005	Peat: Humin	IntCal13	-20.89	64	0.64	-21.53	64	8315	29	BP	9439	9252	9345.5	T'=9.0; T'(5%)=3.8; v=1
ELF005	Peat: Humic acid	IntCal13	-20.89	67	0.67	-21.56	67	8231	29	BP	9300	9035	9167.5	No	N/A	N/A
ELF005	Peat: Humin	IntCal13	-20.89	67	0.67	-21.56	67	8368	29	BP	9470	9303	9386.5	T'=11.2; T'(5%)=3.8; v=1
ELF005A	Organic silt: humic acid	IntCal13	-21.83	48-50	0.49	-22.32	49	8098	30	BP	9121	8991	9056
ELF005A	Organic silt: humic acid	IntCal13	-21.83	52-54	0.53	-22.36	53	8188	30	BP	9255	9028	9141.5	Yes	8211±22	9275-9034 cal BP
ELF005A	Organic silt: humin fraction	IntCal13	-21.83	52-54	0.53	-22.36	53	8234	30	BP	9305	9035	9170	T'=1.2; T'(5%)=3.8; v=1
ELF005B	Organic silt: humic acid	IntCal13	-22.87	66-68	0.67	-23.54	67	8244	30	BP	9398	9092	9245
ELF007	Peat: humic acid	IntCal13	-22.17	201-203	2.02	-24.19	202	8217	30	BP	9288	9033	9160.5	Yes	8219±21	9280-9090 cal BP
ELF007	Peat: humin fraction	IntCal13	-22.17	201-203	2.02	-24.19	202	8220	30	BP	9291	9033	9162	T'=0.0; T'(5%)=3.8; v=1
ELF007	Peat: humic acid	IntCal13	-22.17	215	2.15	-24.32	215	8557	30	BP	9550	9494	9522	Yes	8577±21	9552-9525 cal BP
ELF007	Peat: humin fraction	IntCal13	-22.17	215	2.15	-24.32	215	8596	30	BP	9623	9521	9572	T'=0.9; T'(5%)=3.8; v=1
ELF007	Peat: Humic acid	IntCal13	-22.17	202	2.02	-24.19	202	8233	29	BP	9303	9035	9169	Yes	8248±21	9302-9128 cal BP
ELF007	Peat: Humin	IntCal13	-22.17	202	2.02	-24.19	202	8262	29	BP	9400	9130	9265	T'=0.5; T'(5%)=3.8; v=1
ELF007	Peat: Humic acid	IntCal13	-22.17	194	1.94	-24.11	194	8352	29	BP	9461	9298	9379.5	No	N/A	N/A
ELF007	Peat: Humin	IntCal13	-22.17	194	1.94	-24.11	194	8491	29	BP	9534	9471	9502.5	T'=11.5; T'(5%)=3.8; v=1
ELF007	Peat: Humic acid	IntCal13	-22.17	201	2.01	-24.18	201	8220	29	BP	9290	9033	9161.5	Yes	8213±21	9274-9037 cal BP
ELF007	Peat: Humin	IntCal13	-22.17	201	2.01	-24.18	201	8206	29	BP	9274	9032	9153	T'=0.1; T'(5%)=3.8; v=1
ELF007	Peat: Humic acid	IntCal13	-22.17	206	2.06	-24.23	206	8324	29	BP	9441	9267	9354	Yes	8286±21	9407-9144 cal BP
ELF007	Peat: Humin	IntCal13	-22.17	206	2.06	-24.23	206	8247	29	BP	9398	9122	9260	T'=3.5; T'(5%)=3.8; v=1
ELF007	Peat: Humic acid	IntCal13	-22.17	210	2.1	-24.27	210	8336	29	BP	9450	9281	9365.5	Yes	8308±21	9425-9265 cal BP
ELF007	Peat: Humin	IntCal13	-22.17	210	2.1	-24.27	210	8279	29	BP	9405	9138	9271.5	T'=1.9; T'(5%)=3.8; v=1
ELF009	Shell: articulated bivalve	Marine13	-22.76	230	2.3	-25.06	230	8415	30	BP	9226	8806	9016
ELF009	Shell: articulated bivalve	Marine13	-22.76	246	2.46	-25.22	246	8407	30	BP	9199	8792	8995.5
ELF009	Shell (marine)	Marine13	-22.76	292	2.92	-25.68	292	8480	30	BP	9450	8690	9070
ELF009	Peat	IntCal13	-22.76	326-328	3.27	-26.03	327	7900	30	BP	8971	8597	8784
ELF009	Peat: Humic acid	IntCal13	-22.76	327	3.27	-26.03	327	8044	29	BP	9024	8779	8901.5	Yes	8039±21	9018-8781 cal BP
ELF009	Peat: Humin	IntCal13	-22.76	327	3.27	-26.03	327	8033	29	BP	9016	8777	8896.5	T'=0.1; T'(5%)=3.8; v=1
ELF009	Peat: Humic acid	IntCal13	-22.76	337	3.37	-26.13	337	8169	29	BP	9251	9018	9134.5	Yes	8198±21	9261-9032 cal BP
ELF009	Peat: Humin	IntCal13	-22.76	337	3.37	-26.13	337	8226	29	BP	9295	9035	9165	T'=1.9; T'(5%)=3.8; v=1
ELF009	Peat	IntCal13	-22.76	346-348	3.47	-26.23	347	8280	30	BP	9405	9137	9271
ELF009	Peat: Humic acid	IntCal13	-22.76	347	3.47	-26.23	347	8355	29	BP	9463	9300	9381.5	Yes	8351±21	9452-9301 cal BP
ELF009	Peat: Humin	IntCal13	-22.76	347	3.47	-26.23	347	8346	29	BP	9458	9292	9375	T'=0.0; T'(5%)=3.8; v=1
ELF009	Peat: Humic acid	IntCal13	-22.76	350	3.5	-26.26	350	8343	29	BP	9455	9290	9372.5	Yes	8323±21	9430-9285 cal BP
ELF009	Peat: Humin	IntCal13	-22.76	350	3.5	-26.26	350	8303	29	BP	9433	9146	9289.5	T'=1.0; T'(5%)=3.8; v=1
ELF018	Shell	Marine13	-24.89	231	2.31	-27.2	231	6345	30	BP	6958	6661	6809.5
ELF019	Peat: Humic acid	IntCal13	-31.7	132	1.32	-33.02	132	8965	29	BP	10225	9933	10079	No	N/A	N/A
ELF019	Peat: Humin	IntCal13	-31.7	132	1.32	-33.02	132	9065	29	BP	10250	10195	10222.5	T'=5.9; T'(5%)=3.8; v=1
ELF019	Peat: Humic acid	IntCal13	-31.7	135	1.35	-33.05	135	9042	29	BP	10241	10189	10215	Yes	9058±21	10243-10199 cal BP
ELF019	Peat: Humin	IntCal13	-31.7	135	1.35	-33.05	135	9073	29	BP	10253	10197	10225	T'=0.6; T'(5%)=3.8; v=1
ELF019	Peat: Humic acid	IntCal13	-31.7	138	1.38	-33.08	138	9548	29	BP	11080	10720	10900	No	N/A	N/A
ELF019	Peat: Humin	IntCal13	-31.7	138	1.38	-33.08	138	10038	29	BP	11747	11358	11552.5	T'=142.5; T'(5%)=3.8; v=1
ELF020	Peat: humic acid	IntCal13	-21.6	179	1.79	-23.39	179	8274	30	BP	9402	9135	9268.5	Yes	8253±21	9393-9129 cal BP
ELF020	Peat: humin fraction	IntCal13	-21.6	179	1.79	-23.39	179	8231	30	BP	9303	9034	9168.5	T'=1.1; T'(5%)=3.8; v=1
ELF020	Peat: humic acid	IntCal13	-21.6	200	2	-23.6	200	11121	30	BP	13089	12885	12987	No	N/A	N/A
ELF020	Peat: humin fraction	IntCal13	-21.6	200	2	-23.6	200	11229	30	BP	13149	13046	13097.5	T'=6.9; T'(5%)=3.8; v=1
ELF020	Peat: Humic acid	IntCal13	-21.6	176	1.76	-23.36	176	8529	29	BP	9543	9487	9515	No	N/A	N/A
ELF020	Peat: Humin	IntCal13	-21.6	176	1.76	-23.36	176	8629	29	BP	9663	9534	9598.5	T'=5.9; T'(5%)=3.8; v=1
ELF020	Peat: Humic acid	IntCal13	-21.6	178	1.78	-23.38	178	8381	29	BP	9480	9305	9392.5	No	N/A	N/A
ELF020	Peat: Humin	IntCal13	-21.6	178	1.78	-23.38	178	8475	29	BP	9533	9461	9497	T'=5.3; T'(5%)=3.8; v=1
ELF020	Peat: Humic acid	IntCal13	-21.6	184	1.84	-23.44	184	8292	29	BP	9425	9142	9283.5	Yes	8263±21	9397-9134 cal BP
ELF020	Peat: Humin	IntCal13	-21.6	184	1.84	-23.44	184	8234	29	BP	9305	9035	9170	T'=2.0; T'(5%)=3.8; v=1
ELF020	Peat: Humic acid	IntCal13	-21.6	190	1.9	-23.5	190	9069	29	BP	10251	10196	10223.5	No	N/A	N/A
ELF020	Peat: Humin	IntCal13	-21.6	190	1.9	-23.5	190	9239	29	BP	10507	10284	10395.5	T'=17.2; T'(5%)=3.8; v=1
ELF020	Peat: Humic acid	IntCal13	-21.6	195	1.95	-23.55	195	10746	29	BP	12733	12649	12691	No	N/A	N/A
ELF020	Peat: Humin	IntCal13	-21.6	195	1.95	-23.55	195	11427	29	BP	13345	13172	13258.5	T'=274.9; T'(5%)=3.8; v=1
ELF031	Organic silt: humic acid	IntCal13	-28	53	0.53	-28.53	53	9007	27	BP	10232	10174	10203
ELF031	Articulated Bivalve	Marine13	-28	47	0.47	-28.47	47	8899	29	BP	9882	9529	9705.5
ELF031A	Organic silt: humic acid	IntCal13	-28	51	0.51	-28.51	51	8926	24	BP	10190	9920	10055
ELF033A	Shell: articulated bivalve	Marine13	-20	46-48	0.47	-20.47	47	8529	30	BP	9325	8995	9160
ELF034	Peat: humic acid	IntCal13	-17	50-52	0.51	-17.51	51	8051	30	BP	9029	8669	8849	Yes	8015±22	9007-8778 cal BP
ELF034	Peat: humin fraction	IntCal13	-17	50-52	0.51	-17.51	51	7978	30	BP	8996	8718	8857	T'=3.0;T'(5%)=3.8;v=1
ELF034	Peat: humic acid	IntCal13	-17	148-150	1.49	-18.49	149	11301	30	BP	13226	13072	13149	Yes	11302±22	13211-13078 cal BP
ELF034	Peat: humin fraction	IntCal13	-17	148-150	1.49	-18.49	149	11303	30	BP	13229	13073	13151	T'=0.0; T'(5%)=3.8; v=1
ELF034	Peat: humic acid	IntCal13	-17	162-164	1.63	-18.63	163	11630	30	BP	13561	13404	13482.5	Yes	11658±22	13563-13435 cal BP
ELF034	Peat: humin fraction	IntCal13	-17	162-164	1.63	-18.63	163	11686	30	BP	13572	13447	13509.5	T'=1.7; T'(5%)=3.8; v=1
ELF034	Peat: humic acid	IntCal13	-17	171-173	1.72	-18.72	172	11921	30	BP	13810	13571	13690.5	Yes	11927±22	13941-13569 cal BP
ELF034	Peat: humin fraction	IntCal13	-17	171-173	1.72	-18.72	172	11932	30	BP	13957	13572	13764.5	T'=0.1; T'(5%)=3.8; v=1
ELF034	Peat: Humic acid	IntCal13	-17	70	0.7	-17.7	70	9951	29	BP	11600	11250	11425	Yes	9972±21	11602-11271 cal BP
ELF034	Peat: Humin	IntCal13	-17	70	0.7	-17.7	70	9992	29	BP	11614	11289	11451.5	T'=1.0; T'(5%)=3.8; v=1
ELF034	Peat: Humic acid	IntCal13	-17	90	0.9	-17.9	90	10452	29	BP	12534	12129	12331.5	Yes	10474±21	12540-12248 cal BP
ELF034	Peat: Humin	IntCal13	-17	90	0.9	-17.9	90	10495	29	BP	12557	12395	12476	T'=1.1; T'(5%)=3.8; v=1
ELF034	Peat: Humic acid	IntCal13	-17	110	1.1	-18.1	110	10533	29	BP	12579	12414	12496.5	Yes	10568±21	12648-12430 cal BP
ELF034	Peat: Humin	IntCal13	-17	110	1.1	-18.1	110	10603	29	BP	12688	12535	12611.5	T'=2.9; T'(5%)=3.8; v=1
ELF034	Peat: Humic acid	IntCal13	-17	130	1.3	-18.3	130	10942	29	BP	12851	12710	12780.5	Yes	10936±21	12827-12717 cal BP
ELF034	Peat: Humin	IntCal13	-17	130	1.3	-18.3	130	10929	29	BP	12833	12711	12772	T'=0.1; T'(5%)=3.8; v=1
ELF034	Peat: Humic acid	IntCal13	-17	180	1.8	-18.8	180	12463	29	BP	14941	14286	14613.5	No	N/A	N/A
ELF034	Peat: Humin	IntCal13	-17	180	1.8	-18.8	180	12675	29	BP	15247	14905	15076	T'=26.7; T'(5%)=3.8; v=1
ELF034	Peat: Humic acid	IntCal13	-17	185	1.85	-18.85	185	12791	29	BP	15368	15105	15236.5	No	N/A	N/A
ELF034	Peat: Humin	IntCal13	-17	185	1.85	-18.85	185	13252	29	BP	16085	15767	15926	T'=126.2; T'(5%)=3.8; v=1
ELF034	Peat: Humic acid	IntCal13	-17	193	1.93	-18.93	193	12530	29	BP	15093	14537	14815	No	N/A	N/A
ELF034	Peat: Humin	IntCal13	-17	193	1.93	-18.93	193	12778	29	BP	15346	15096	15221	T'=36.6; T'(5%)=3.8; v=1
ELF034	Peat: Humic acid	IntCal13	-17	202	2.02	-19.02	202	12839	29	BP	15491	15150	15320.5	No	N/A	N/A
ELF034	Peat: Humin	IntCal13	-17	202	2.02	-19.02	202	13205	29	BP	16035	15720	15877.5	T'=79.6; T'(5%)=3.8; v=1
ELF034	Peat: Humic acid	IntCal13	-17	209	2.09	-19.09	209	13265	29	BP	16101	15781	15941	No	N/A	N/A
ELF034	Peat: Humin	IntCal13	-17	209	2.09	-19.09	209	13933	29	BP	17067	16659	16863	T'=287.9; T'(5%)=3.8; v=1
ELF034A	Shell: articulated bivalve	Marine13	-17	134-136	1.35	-18.35	135	8312	30	BP	9013	8649	8831
ELF034A	Peat: humic acid	IntCal13	-17	169-171	1.7	-18.7	170	8055	30	BP	9031	8779	8905	Yes	8056±22	9026-8792 cal BP
ELF034A	Peat: humin fraction	IntCal13	-17	169-171	1.7	-18.7	170	8056	30	BP	9032	8779	8905.5	T'=0.0; T'(5%)=3.8; v=1
ELF034A	Peat: humic acid	IntCal13	-17	292-294	2.95	-19.95	295	10719	30	BP	12731	12626	12678.5	Yes	10758±22	12736-12668 cal BP
ELF034A	Peat: humin fraction	IntCal13	-17	292-294	2.93	-19.93	293	10796	30	BP	12745	12680	12712.5	T'=3.3; T'(5%)=3.8; v=1
ELF034A	Peat: Humic acid	IntCal13	-17	195	1.95	-18.95	195	8324	29	BP	9441	9267	9354	Yes	8342±21	9441-9296 cal BP
ELF034A	Peat: Humin	IntCal13	-17	195	1.95	-18.95	195	8360	29	BP	9465	9303	9384	T'=0.8; T'(5%)=3.8; v=1
ELF051	Organic silt: humic acid	IntCal13	-27.5	93-95	0.94	-28.44	94	8827	30	BP	10147	9705	9926	Yes	8865±22	10159-9888 cal BP
ELF051	Organic silt: humin fraction	IntCal13	-27.5	93-95	0.94	-28.44	94	8903	30	BP	10175	9914	10044.5	T'=3.2; T'(5%)=3.8; v=1
ELF051	Organic silt: humin fraction	IntCal13	-27.5	115-117	1.16	-28.66	116	9198	30	BP	10486	10251	10368.5	No	N/A	N/A
ELF051	Organic silt: humic acid	IntCal13	-27.5	115-117	1.16	-28.66	116	8986	30	BP	10234	9943	10088.5	T'=25.0; T'(5%)=3.8; v=1
ELF051	Bulk silt: Humic acid	IntCal13	-27.5	103	1.03	-28.53	103	8892	29	BP	10169	9911	10040	No	N/A	N/A
ELF051	Bulk silt: Humin	IntCal13	-27.5	103	1.03	-28.53	103	8951	29	BP	10209	9925	10067	T'=8.8; T'(5%)=3.8; v=1
ELF051	Bulk silt: Humic acid	IntCal13	-27.5	133	1.33	-28.83	133	10090	29	BP	11930	11405	11667.5	No	N/A	N/A
ELF051	Bulk silt: Humin	IntCal13	-27.5	133	1.33	-28.83	133	10499	29	BP	12556	12399	12477.5	T'=99.3; T'(5%)=3.8; v=1
ELF051	Bulk silt: Humic acid	IntCal13	-27.5	141	1.41	-28.91	141	10397	29	BP	12409	12097	12253	Yes	10421±21	12508-12113 cal BP
ELF051	Bulk silt: Humin	IntCal13	-27.5	141	1.41	-28.91	141	10444	29	BP	12457	12123	12290	T'=1.3; T'(5%)=3.8; v=1
ELF054	Peat: humic acid	IntCal13	-22.5	284-286	2.85	-25.35	285	8518	30	BP	9540	9481	9510.5	No	N/A	N/A
ELF054	Peat: humin fraction	IntCal13	-22.5	284-286	2.85	-25.35	285	8725	30	BP	9883	9555	9719	T'=23.8; T'(5%)=3.8; v=1
ELF054	Peat: humic acid	IntCal13	-22.5	378-380	3.79	-26.29	379	11053	30	BP	13029	12803	12916	No	N/A	N/A
ELF054	Peat: humin fraction	IntCal13	-22.5	378-380	3.79	-26.29	379	11184	30	BP	13110	13000	13055	T'=9.5; T'(5%)=3.8; v=1
ELF054	Peat: Humic acid	IntCal13	-22.5	294	2.94	-25.44	294	8396	29	BP	9491	9311	9401	Yes	8404±21	9487-9407 cal BP
ELF054	Peat: Humin	IntCal13	-22.5	294	2.94	-25.44	294	8412	29	BP	9516	9325	9420.5	T'=0.2; T'(5%)=3.8; v=1
ELF054	Peat: Humic acid	IntCal13	-22.5	305	3.05	-25.55	305	8296	29	BP	9429	9143	9286	Yes	8317±21	9427-9280 cal BC
ELF054	Peat: Humin	IntCal13	-22.5	305	3.05	-25.55	305	8337	29	BP	9450	9283	9366.5	T'=1.0; T'(5%)=3.8; v=1
ELF054	Peat: Humic acid	IntCal13	-22.5	315	3.15	-25.65	315	8862	29	BP	10160	9888	10024	Yes	8873±21	10157-9903 cal BP
ELF054	Peat: Humin	IntCal13	-22.5	315	3.15	-25.65	315	8883	29	BP	10167	9905	10036	T'=0.3; T'(5%)=3.8; v=1
ELF054	Peat: Humic acid	IntCal13	-22.5	325	3.25	-25.75	325	9713	29	BP	11216	11101	11158.5	No	N/A	N/A
ELF054	Peat: Humin	IntCal13	-22.5	325	3.25	-25.75	325	9856	29	BP	11311	11211	11261	T'=12.2; T'(5%)=3.8; v=1
ELF054	Peat: Humic acid	IntCal13	-22.5	331	3.31	-25.81	331	11219	29	BP	13140	13040	13090	No	N/A	N/A
ELF054	Peat: Humin	IntCal13	-22.5	331	3.31	-25.81	331	11488	29	BP	13417	13267	13342	T'=43.0; T'(5%)=3.8; v=1
ELF054	Peat: Humic acid	IntCal13	-22.5	343	3.43	-25.93	343	11380	29	BP	13294	13139	13216.5	No	N/A	N/A
ELF054	Peat: Humin	IntCal13	-22.5	343	3.43	-25.93	343	11526	29	BP	13444	13290	13367	T'=12.7; T'(5%)=3.8; v=1
ELF054	Peat: Humic acid	IntCal13	-22.5	355	3.55	-26.05	355	11128	24	BP	13060	12931	12995.5	No	N/A	N/A
ELF054	Peat: Humin	IntCal13	-22.5	355	3.55	-26.05	355	11206	24	BP	13124	13034	13079	T'=5.3; T'(5%)=3.8; v=1
ELF054	Peat: Humic acid	IntCal13	-22.5	366	3.66	-26.16	366	11172	25	BP	13101	13001	13051	No	N/A	N/A
ELF054	Peat: Humin	IntCal13	-22.5	366	3.66	-26.16	366	11242	25	BP	13149	13055	13102	T'=3.9; T'(5%)=3.8; v=1
ELF 002	Peat: Humic acid		-23.35		2.88	-26.23		8081	29	BP
ELF 002	Peat: Humic acid		-23.35		2.91	-26.26		8066	29	BP
ELF 002	Peat: Humic acid		-23.35		2.99	-26.34		8304	29	BP
ELF 002	Peat: Humic acid		-23.35		3.02	-26.37		8606	29	BP
ELF 002	Peat: Humic acid		-23.35		3.05	-26.4		9109	29	BP
ELF 020	Peat: Humic acid		-21.6		1.81	-23.41		8300	29	BP
ELF 020	Peat: Humic acid		-21.6		1.86	-23.46		8423	29	BP
ELF 020	Peat: Humic acid		-21.6		1.88	-23.48		8922	29	BP
ELF 020	Peat: Humic acid		-21.6		1.92	-23.52		10624	29	BP
ELF 020	Peat: Humic acid		-21.6		1.94	-23.54		10751	29	BP
ELF 020	Peat: Humic acid		-21.6		1.96	-23.56		11009	29	BP
ELF 020	Peat: Humic acid		-21.6		1.98	-23.58		11277	29	BP
ELF 032A	Organic sand: Humic acid		-20		1.77	-21.77		8862	29	BP
ELF 033	Organic sand: Humic acid		-20		1.55	-21.55		9314	29	BP
ELF 034	Peat: Humic acid		-17		0.6	-17.6		9044	29	BP
ELF 034	Peat: Humic acid		-17		0.65	-17.65		9328	29	BP
ELF 034	Peat: Humic acid		-17		0.8	-17.8		10472	29	BP
ELF 034	Peat: Humic acid		-17		1	-18		10592	29	BP
ELF 034	Peat: Humic acid		-17		1.2	-18.2		10561	29	BP
ELF 034	Peat: Humic acid		-17		1.4	-18.4		10931	29	BP
ELF 034	Peat: Humic acid		-17		1.56	-18.56		11592	29	BP
ELF 034	Peat: Humic acid		-17		1.66	-18.66		11894	29	BP
ELF 034	Peat: Humic acid		-17		1.76	-18.76		12773	29	BP
ELF 034	Peat: Humic acid		-17		1.87	-18.87		12409	29	BP
ELF 034	Peat: Humic acid		-17		1.9	-18.9		12632	29	BP
ELF 034	Peat: Humic acid		-17		1.99	-18.99		13211	33	BP
ELF 034	Peat: Humic acid		-17		2.05	-19.05		13819	31	BP
ELF 054	Peat: Humic acid		-22.5		2.9	-25.4		8433	29	BP
ELF 054	Peat: Humic acid		-22.5		3	-25.5		8361	29	BP
ELF 054	Peat: Humic acid		-22.5		3.1	-25.6		8494	29	BP
ELF 054	Peat: Humic acid		-22.5		3.2	-25.7		8999	29	BP
ELF 054	Peat: Humic acid		-22.5		3.35	-25.85		11901	29	BP
ELF 054	Peat: Humic acid		-22.5		3.4	-25.9		11293	29	BP
ELF 054	Peat: Humic acid		-22.5		3.45	-25.95		11324	29	BP
ELF 054	Peat: Humic acid		-22.5		3.5	-26		11250	29	BP
ELF 020	Peat: Humic acid		-21.6		2.07	-23.67		13837	31	BP
ELF 020	Peat: Humic acid		-21.6		2.14	-23.74		13418	31	BP
										150-250micron		90-150micron
Core	Unit		Core elevation	Depth (CM)	Depth mean (m)	Depth (calc)	Mean depth (cm)	Depositional Age / ka	Error / ka	Depositional Age / ka	Error / ka	Depositional Age / ka	Error / ka
ELF001A	4		-24.7	100	1	-25.7	100	6.03123	0.220992						Assumptions:
ELF001A	4, base		-24.7	105	1.05	-25.75	105	7.16376	0.503703
ELF001A	5		-24.7	110-117	1.135	-25.835	113.5	8.21949	0.426389
ELF001A	base 5		-24.7	136-150	1.43	-26.13	143	8.03755	0.42891
ELF002	13, base		-23.35	317	3.17	-26.52	317	16.57	1.92
ELF002	15, top		-23.35	337	3.37	-26.72	337	33.78	3.18
ELF002	15		-23.35	342	3.42	-26.77	342	36.05	3.83
ELF002	15, base		-23.35	358	3.58	-26.93	358	56.66	8.15
ELF003	14		-22.93	299	2.99	-25.92	299	7.92757	1.11222
ELF003	14		-22.93	306	3.06	-25.99	306	7.86018	1.25032						unit 14, combined age	7.91668	0.667012	7.24967	8.58369	7250-8580
ELF003	14, base		-22.93	309	3.09	-26.02	309	7.95086	1.11831						unit 14 + 15	7.69388	0.551101	7.14278	8.24498	7140-8240
ELF003	15, top		-22.93	312	3.12	-26.05	312	7.21463	0.978269
ELF003	15		-22.93	318	3.18	-26.11	318	10.2046	1.32757
ELF003	15		-22.93	323	3.23	-26.16	323	13.8244	1.6835
ELF003	15		-22.93	328	3.28	-26.21	328	10.7128	1.27668
ELF003	16		-22.93	339	3.39	-26.32	339	>14.5ka
ELF005B	5, base		-22.87	71	0.71	-23.58	71	13.8385	1.15011
ELF005B	6, base		-22.87	79	0.79	-23.66	79	15.9138	1.28339						weighted combination of OSL ages from unit 8	16.747	1.9463
ELF005B	7, top		-22.87	85	0.85	-23.72	85	16.7763	1.82548						deposition/re-working of diamicton at	17.9704	2.60717
ELF005B	8, top		-22.87	91	0.91	-23.78	91	16.2226	2.50502
ELF005B	8		-22.87	114	1.14	-24.01	114	17.5458	3.0916
ELF005B	9, top		-22.87	123	1.23	-24.1	123	19.0158	4.85119
ELF007	2, top		-22.17	20	0.2	-22.37	20	7.72839	0.767466
ELF007	2		-22.17	46	0.46	-22.63	46	8.0662	0.720423	7.57841	0.95924	7.99518	1.27933		two interpretations of sediment ages through 86 cm to 20cm, depending on significance of sediment age at 86 cm: - sediment age at 86 cm accepted: sediment ages through 80 to 51 cm are over-age estimates due to poor-bleaching of strata at deposition; no prolonged chronology, with depositional ages near contemporary at 8.03 ± 0.24 ka (at base of sands) and 8.03 ± 0.30 ka (at top) - sediment age at …
ELF007	2		-22.17	51	0.51	-22.68	51	9.49398	1.05218	8.28307	0.96405	7.79193	1.08416		ages indistinguishable within error	9.52096	0.891766
ELF007	2		-22.17	56	0.56	-22.73	56	8.92966	1.03881	9.49398	1.05218
ELF007	3		-22.17	80	0.8	-22.97	80	9.13117	1.03351	8.92966	1.03881
ELF007	3, base		-22.17	86	0.86	-23.03	86	7.96701	0.548747	9.13117	1.03351
ELF007	4, top		-22.17	95	0.95	-23.12	95	9.58766	1.16353	8.06283	0.835696	7.89438	0.727579			7.99588	0.458698
ELF007	4		-22.17	99	0.99	-23.16	99	9.426	1.38833			9.58766	1.16353
ELF012	1, base			395	3.95	-3.95	395	5.78708	0.288524			9.426	1.38833
ELF019	2, base		-31.7	30	0.3	-32	30	6.3	0.27
ELF019	3		-31.7	33	0.33	-32.03	33	6.51	0.2	6.64526	0.843594	6.0026	0.731698		units 2 and 3 deposited, or bleached, at	5.96854	0.339409	5.62913	6.30795	5630-6310
ELF019	3, base		-31.7	34	0.34	-32.04	34	5.56	0.2	6.51179	0.786315				unit 15 deposited at	5.75584	0.287904	5.46794	6.04374	5470-6040
ELF019	15		-31.7	121	1.21	-32.91	121	6.33632	0.34716	5.25777	0.760669	5.64617	0.696384		rapid accumulation of sediment between 30 and 130 cm depth in core implied by similar depositional ages	5.79932	0.223534	5.57578	6.02285	5580-6020
ELF019	15		-31.7	124	1.24	-32.94	124	6.37	0.27	6.33632	0.34716				unit 18 deposited at	9.26354	0.431048	8.83249	9.69458	8830-9690
ELF019	15		-31.7	126	1.26	-32.96	126	5.33	0.3	6.26187	0.628048	6.51593	0.607716		unit 24 deposited at	9.88168	0.617191	9.26449	10.4989	9260-10500
ELF019	15		-31.7	128	1.28	-32.98	128	6.47	0.36	5.58725	0.487159	5.01918	0.52167
ELF019	15, base		-31.7	130	1.3	-33	130	5.61	0.31	6.63625	0.576796
ELF019	18		-31.7	142	1.42	-33.12	142	9.09	0.42	5.3247	0.555541	4.77632	0.404399
ELF019	18		-31.7	145	1.45	-33.15	145	8.22477	1.69168	9.50012	1.16589	8.73736	0.887518
ELF019	18, base		-31.7	150	1.5	-33.2	150	9.78	0.68	8.22477	1.69168
ELF019	24, base		-31.7	380	3.8	-35.5	380	9.67	0.76	9.22187	0.671017	10.4408	1.11352
ELF020	13		-21.6	210	2.1	-23.7	210	9.79	0.76	9.01691	1.38973	10	0.514127
ELF020	13, base		-21.6	215	2.15	-23.75	215	10.3663	1.11236						silts, immediately beneath peat; discordant with radiocarbon age of 10756 ± 29 BP; U-Th disequilibrium across peat boundary?; calculated assuming late deposition of excess U	9.79	0.76
ELF020	14		-21.6	220	2.2	-23.8	220	12.7927	1.17371						position of unit 14; development of wetlands above till	13.0182	1.25804	11.7601	14.2762	11760-14280
ELF020	14 / 15?		-21.6	225	2.25	-23.85	225	14.783	3.28323
ELF020	15		-21.6	256	2.56	-24.16	256	22.2826	3.62176
ELF020	15, base		-21.6	260	2.6	-24.2	260	13.2611	1.1008
ELF020	16		-21.6	270	2.7	-24.3	270	14.9574	1.64142
ELF022	6, mid			91	0.91	-0.91	91	12.6033	1.4246
ELF022	6, mid		0	97	0.97	-0.97	97	13.7091	1.3545						Flooding of surface 9; deposition of unit 8	7.88558	0.42035	7.46523	8.30593	7470-8310
ELF022	7, base		0	130	1.3	-1.3	130	13.5121	1.5784
ELF022	8, top		0	136	1.36	-1.36	136	13.5567	1.71328
ELF022	8		0	140	1.4	-1.4	140	7.95063	2.13392
ELF022	8		0	145	1.45	-1.45	145	8.32893	0.911704
ELF022	8		0	149	1.49	-1.49	149	7.47976	0.710515
ELF022	8		0	155	1.55	-1.55	155	12.4974	1.36824
ELF022	9, top		0	160	1.6	-1.6	160	11.1683	1.05194
ELF022	10, top		0	190	1.9	-1.9	190	12.9003	1.2727
ELF022	10		0	210	2.1	-2.1	210	12.8413	1.27922
ELF027	2, base			95	0.95	-0.95	95	15.1344	3.22733
ELF027	3, top		0	101	1.01	-1.01	101	16.0475	3.28989						this combination gives equal weighting to the lower samples (units 4 through 16)	10.5338	0.798431
ELF027	3, base		0	115	1.15	-1.15	115	11.2145	2.00171						includes sample from base of unit 3	10.6272	0.741612
ELF027	4, base		0	130	1.3	-1.3	130	9.48447	1.42292							11.2921	1.31531	9.97675	12.6074	9980-12610
ELF027	5, base		0	172	1.72	-1.72	172	11.5332	1.90895
ELF027	6		0	176	1.76	-1.76	176	11.0741	1.81488
ELF027	14, top		0	419	4.19	-4.19	419	10.9052	1.94448
ELF027	14, top		0	440	4.4	-4.4	440	10.4552	2.07504
ELF031A	6, base		-28	100	1	-29	100	9.27932	1.12368
ELF031A	7, top		-28	105	1.05	-29.05	105	8.09945	0.874969
ELF031A	7, base		-28	110	1.1	-29.1	110	9.33335	1.0581
ELF031A	8, top		-28	119	1.19	-29.19	119	10.2343	1.07293
ELF031A	11		-28	290	2.9	-30.9	290	14.7794	2.58362
ELF031A	12, top		-28	305	3.05	-31.05	305	11.5718	1.48719
ELF031A	12		-28	310	3.1	-31.1	310	13.1828	1.68538
ELF034	1, base		-17	15	0.15	-17.15	15	2.25	0.24
ELF034	3, top		-17	38	0.38	-17.38	38	13.99	1.26	2.25562	0.316173
ELF034	17, base		-17	186	1.86	-18.86	186	8.2	0.91	13.0865	1.50991
ELF034	18, base		-17	195	1.95	-18.95	195	8.84	0.48			8.1673	2.04564
ELF034	20, base		-17	215	2.15	-19.15	215	12.36	0.66	9.3138	2.17934	8.12672	2.02415
ELF034	21, base		-17	226	2.26	-19.26	226	14.13	1.49	12.2981	2.58187	12.4533	2.57829
ELF034	22, base		-17	235	2.35	-19.35	235	14.92	1.86	14.1546	3.21181	14.2567	4.00686
ELF039	5,base			255	0	0		7.70967	0.963655	14.9159	3.62455
ELF039	6, top		0	265	0	0		8.77329	1.28631
ELF039	7		0	329	0	0		8.78313	1.07673
ELF039	7		0	335	0	0		9.13948	1.04384							8.96683	0.749464	8.21737	9.7163	8220-9720
ELF039	7		0	340	0	0		13.0356	2.57051
ELF042	4			75-80	0.775	-0.775	77.5	4.87254	0.45223
ELF042	4		0	80	0.8	-0.8	80	5.63098	0.497413					ELF42/75-80, ELF42/8	top of brackish tidal mudflats, as preserved in core 42	5.19	0.17	5.02	5.36	5020-5360
ELF042	4		0	90	0.9	-0.9	90	5.51562	0.479367					ELF42/9, ELF42/10		5.02	0.16	4.86	5.18	4860-5180
ELF042	4		0	98	0.98	-0.98	98	4.511	0.423952					ELF42/37, ELF42/375-380	base of brackish tidal mudflats, as preserved in core 42	5.57	0.15	5.42	5.72	5420-5720
ELF042	10		0	370	3.7	-3.7	370	5.75042	0.518198					ELF42/37, ELF42/375-380, ELF42/39		5.49	0.16	5.33	5.65	5330-5650
ELF042	10		0	375-380	3.775	-3.775	377.5	5.46007	0.478281
ELF042	10		0	390	3.9	-3.9	390	5.2786	0.49534
ELF045	5, top			160	1.6	-1.6	160	7.44	0.67
ELF045	5		0	170	1.7	-1.7	170	9.12	1.91			7.42981	0.75536	ELF045/18 and /19	top of 'tidal' mudflats	8.19	0.96	7.23	9.15	7230-9150
ELF045	8, base		0	540	5.4	-5.4	540	11.01	0.89					ELF045/61 and /62	base (as recorded in core) of open estuary	10.97	0.53	10.44	11.5	10440-11500
ELF045	8, base		0	545	5.45	-5.45	545	11.02	0.67	10.7085	1.20991	10.4456	1.10884	ELF045/63 and /64		13.39	0.85	12.54	14.24	12540-14240
ELF045	8, base		0	550	5.5	-5.5	550	13.38	1.08	10.0498	1.10239	12.0428	1.48455
ELF045	8, base		0	555	5.55	-5.55	555	13.42	1.37	12.4914	1.61842	15.0851	2.44128
ELF047	4, near top			398	3.98	-3.98	398	8.62	0.33	12.4914	1.9986	22.1947	6.51694
ELF047	6, top		0	426	4.26	-4.26	426	11.22	0.54					ELF047/46, /47	accumulation on ‘storm beach’	9.06566	0.263535	8.80213	9.3292	8800-9330
ELF047	6, base		0	431	4.31	-4.31	431	9.25	0.5					ELF047/45, /46, /47		9.10574	0.233134	8.8726	9.33887	8870-9340
ELF047	7, top		0	437	4.37	-4.37	437	9.42	0.78
ELF047	7, mid		0	444	4.44	-4.44	444	9.02	0.28
ELF047	7		0	451	4.51	-4.51	451	12.82	1.28
ELF049	3, base			155	1.55	-1.55	155	10.2851	1.23509
ELF049	3, base		0	159	1.59	-1.59	159	8.09064	1.19973	10.2851	1.23509			ELF049/20, /21	base of medium to coarse, ‘marine’ sands; TAQ for erosion of unit 4	9.15604	1.09772	8.05832	10.2538	8060-10250
ELF049	4, top		0	175	1.75	-1.75	175	35.5817	6.35854	8.09064	1.19973			ELF049/27, /56	assuming units at 414 and 195 cm well-bleached; sands accumulated from c.29 ka	29.7013	3.10966	26.5916	32.8109	26590-32810
ELF049	4		0	180	1.8	-1.8	180	38.9692	4.88743	35.5817	6.35854			ELF049/24, /25, /26, /27, /48, /49, /51, /54	deposition of unit 4 and unit 6 sands; sand accumulation no older tha	37.3818	2.93956	34.4423	40.3214	34440-40320
ELF049	4		0	185	1.85	-1.85	185	43.6436	5.34002	38.9692	4.88743
ELF049	4		0	195	1.95	-1.95	195	29.7793	3.63429			43.6436	5.34002
ELF049	6		0	370	3.7	-3.7	370	49.6146	6.52689			29.7793	3.63429
ELF049	6		0	380	3.8	-3.8	380	48.359	11.4904	49.6146	6.52689
ELF049	6		0	400	4	-4	400	41.2636	8.97879	48.359	11.4904
ELF049	6, base		0	410	4.1	-4.1	410	42.8298	6.36915	41.2636	8.97879
ELF049	8, top		0	414	4.14	-4.14	414	29.488	6.0083	42.8298	6.36915
ELF049	8, base		0	422	4.22	-4.22	422	83.1426	7.34326	29.488	6.0083
ELF051	3		-27.5	80	0.8	-28.3	80	10.19	0.5	83.1426	7.34326
ELF051	3, base		-27.5	83	0.83	-28.33	83	11.2	0.8	10.1355	1.26649	10.5125	1.15234			10.1827	0.465069	9.71759	10.6477	9720-10650
ELF051	3, base		-27.5	85	0.85	-28.35	85	10.99	0.78	11.0226	1.05041					11.1349	0.636437	10.4984	11.7713	10500-11770
ELF051	4, top		-27.5	90	0.9	-28.4	90	11.48	1.36	11.2611	1.51462	9.68533	1.4092			11.0468	0.693449	10.3534	11.7403	10350-11740
ELF051	4		-27.5	93	0.93	-28.43	93	11.63	0.97	11.0979	1.4195	14.8968	4.7519			11.2971	0.982027	10.3151	12.2792	10320-12280
ELF051	7		-27.5	138	1.38	-28.88	138	12.12	0.9			11.478	1.79456
ELF051	8		-27.5	141	1.41	-28.91	141	13.11	0.82			12.1182	1.47149			11.0946	0.468891	10.6257	11.5635	10630-11560
ELF053	2, top			55	0.55	-0.55	55	14.8106	3.52955			13.1067	1.27731
ELF053	2		0	65	0.65	-0.65	65	25.2143	4.53272
ELF053	2		0	75	0.75	-0.75	75	27.5459	4.22678
ELF053	4		0	231	2.31	-2.31	231	22.3936	2.29062
ELF053	5, top		0	241	2.41	-2.41	241	45.9897	5.28291
ELF053	5		0	251	2.51	-2.51	251	58.8451	8.11434
ELF054	2, top		-22.5	31	0.31	-22.81	31	5.73	0.26
ELF054	2		-22.5	52	0.52	-23.02	52	5.70531	0.795805			5.93953	0.799581		top unit 2, 31-52cm depth	5.49401	0.461606	5.0324	5.95562	5030-5960
ELF054	2		-22.5	82	0.82	-23.32	82	6.42	0.88			5.70531	0.795805		unit 2, 82-99 cm depth	5.77607	0.499304	5.27677	6.27538	5280-6280
ELF054	2		-22.5	85	0.85	-23.35	85	6.02861	1.08623			6.55658	1.1881		unit 2, 135-155, 82-99 cm depth	5.24339	0.452327	4.79106	5.69571	4790-5700
ELF054	2		-22.5	99	0.99	-23.49	99	6.55009	1.05101			6.02861	1.08623		base unit 2, 215-235 , 82-99 cm depth	5.45143	0.326245	5.12519	5.77768	5130-5780
ELF054	2		-22.5	135	1.35	-23.85	135	6.04756	0.818755			6.55009	1.05101
ELF054	2		-22.5	155	1.55	-24.05	155	4.94135	0.73602			6.04756	0.818755
ELF054	2		-22.5	215	2.15	-24.65	215	5.23304	0.637788			4.94135	0.73602
ELF054	2		-22.5	225	2.25	-24.75	225	5.58052	0.556397			5.23304	0.637788
ELF054	2, base		-22.5	235	2.35	-24.85	235	5.95421	0.680913			5.58052	0.556397
ELF059	2			40	0.4	-0.4	40	6.37502	0.754678			5.95421	0.680913
ELF059	2		0	52	0.52	-0.52	52	6.76288	0.751328						end of accumulation on tidal mudflats	6.56982	0.532449	ELF59/3 and 59/4
ELF059	5		0	320	3.2	-3.2	320	5.02701	0.475577						switch from terrestrial to littoral setting	6.84651	0.55692	ELF59/32, 59/33 and 59/34
ELF059	6/7 boundary		0	330	3.3	-3.3	330	7.18755	0.80036
ELF059	7		0	340	3.4	-3.4	340	6.90453	0.974578
ELF059	7		0	350	3.5	-3.5	350	6.58514	0.906847

## Sheet: Table S11b OSL
												150-250micron		90-150micron
Core	Unit		Core elevation	Depth (CM)	Depth mean (m)	Depth (calc)	Mean depth (cm)	Depositional Age / ka	Error / ka	Range BP	As used in this study	Depositional Age / ka	Error / ka	Depositional Age / ka	Error / ka	Assumptions	(combining sub-samples)	Depositional Age / ka	Error / ka
ELF001A	4		-24.7	100	1	-25.7	100	6.03123	0.220992	5810-6250	6.03 ± 0.22 ka; 5810-6250 @ 95 cm
ELF001A	4, base		-24.7	105	1.05	-25.75	105	7.16376	0.503703	6660-7670	7.16 ± 0.50 ka; 6660-7670 @ 105 cm
ELF001A	5		-24.7	110-117	1.135	-25.835	113.5	8.21949	0.426389	7790-8650	8.22 ± 0.43 ka; 7790-8650 @ 113.5 cm
ELF001A	base 5		-24.7	136-150	1.43	-26.13	143	8.03755	0.42891	7610-8470	8.04 ± 0.43 ka; 7610-8470 @ 143 cm
ELF002	13, base		-23.35	317	3.17	-26.52	317	16.57	1.92	14650-18490	16.57 ± 1.92 ka; 14650-18490 @317 cm
ELF002	15, top		-23.35	337	3.37	-26.72	337	33.78	3.18	30600-36960	33.78 ± 3.18 ka; 30600-36960 @337 cm
ELF002	15		-23.35	342	3.42	-26.77	342	36.05	3.83	32220-39880
ELF002	15, base		-23.35	358	3.58	-26.93	358	56.66	8.15	48510-64810
ELF003	14		-22.93	299	2.99	-25.92	299	7.92757	1.11222	6820-9040
ELF003	14		-22.93	306	3.06	-25.99	306	7.86018	1.25032	6610-9110	7.69 ± 0.55 ka; 7140-8240 @312-299 cm					unit 14, combined age		7.91668	0.667012	7250-8580
ELF003	14, base		-22.93	309	3.09	-26.02	309	7.95086	1.11831	6830-9070						unit 14 + 15		7.69388	0.551101	7140-8240
ELF003	15, top		-22.93	312	3.12	-26.05	312	7.21463	0.978269	6240-8190	7.21 ± 0.98 ka; 6240-8190 @312 cm
ELF003	15		-22.93	318	3.18	-26.11	318	10.2046	1.32757	8880-11530	10.20 ± 1.33 ka; 8880-11530 @318cm
ELF003	15		-22.93	323	3.23	-26.16	323	13.8244	1.6835	12140-15510
ELF003	15		-22.93	328	3.28	-26.21	328	10.7128	1.27668	9440-11990	10.71 ± 1.28 ka; 9440-11990 @328cm
ELF003	16		-22.93	339	3.39	-26.32	339	>14.5ka
ELF005B	5, base		-22.87	71	0.71	-23.58	71	13.8385	1.15011	12690-14990
ELF005B	6, base		-22.87	79	0.79	-23.66	79	15.9138	1.28339	14630-17200						weighted combination of OSL ages from unit 8		16.747	1.9463	14800-18690
ELF005B	7, top		-22.87	85	0.85	-23.72	85	16.7763	1.82548	14950-18600						deposition/re-working of diamicton at		17.9704	2.60717	15360-20580
ELF005B	8, top		-22.87	91	0.91	-23.78	91	16.2226	2.50502	13720-18730
ELF005B	8		-22.87	114	1.14	-24.01	114	17.5458	3.0916	14450-20640
ELF005B	9, top		-22.87	123	1.23	-24.1	123	19.0158	4.85119	14160-23870
ELF007	2, top		-22.17	20	0.2	-22.37	20	7.72839	0.767466	6960-8500
ELF007	2		-22.17	46	0.46	-22.63	46	8.0662	0.720423	7350-8790		7.57841	0.95924	7.99518	1.27933	two interpretations of sediment ages through 86 cm to 20cm, depending on significance of sediment age at 86 cm: - sediment age at 86 cm accepted: sediment ages through 80 to 51 cm are over-age estimates due to poor-bleaching of strata at deposition; no prolonged chronology, with depositional ages near contemporary at 8.03 ± 0.24 ka (at base of sands) and 8.03 ± 0.30 ka (at top) - sediment age at …
ELF007	2		-22.17	51	0.51	-22.68	51	9.49398	1.05218	8440-10550		8.28307	0.96405	7.79193	1.08416	ages indistinguishable within error		9.52096	0.891766	8630-10410
ELF007	2		-22.17	56	0.56	-22.73	56	8.92966	1.03881	7890-9970		9.49398	1.05218
ELF007	3		-22.17	80	0.8	-22.97	80	9.13117	1.03351	8100-10160		8.92966	1.03881
ELF007	3, base		-22.17	86	0.86	-23.03	86	7.96701	0.548747	7540-8450	8.00 ± 0.46 ka; 7540-8450 @ 86 cm	9.13117	1.03351
ELF007	4, top		-22.17	95	0.95	-23.12	95	9.58766	1.16353	8420-10750	9.52 ± 0.89 ka; 8040-10810 at 95-99cm	8.06283	0.835696	7.89438	0.727579			7.99588	0.458698	7540-8450
ELF007	4		-22.17	99	0.99	-23.16	99	9.426	1.38833	8040-10810				9.58766	1.16353
ELF012	1, base			395	3.95	-3.95	395	5.78708	0.288524	5500-6080				9.426	1.38833
ELF019	2, base		-31.7	30	0.3	-32	30	6.3	0.27	6030-6570	5.97 ± 0.34 ka; 5630-6310 @units2-3 30-34cm
ELF019	3		-31.7	33	0.33	-32.03	33	6.51	0.2	6310-6710	5.76 ± 0.29 ka; 5470-6040 @unit 15 121-130 cm	6.64526	0.843594	6.0026	0.731698	units 2 and 3 deposited, or bleached, at		5.96854	0.339409	5630-6310
ELF019	3, base		-31.7	34	0.34	-32.04	34	5.56	0.2	5360-5760		6.51179	0.786315			unit 15 deposited at		5.75584	0.287904	5470-6040
ELF019	15		-31.7	121	1.21	-32.91	121	6.33632	0.34716	5990-6680	9.26 ± 0.43 ka; 8830-9690 @unit 18 142-150 cm	5.25777	0.760669	5.64617	0.696384	rapid accumulation of sediment between 30 and 130 cm depth in core implied by similar depositional ages		5.79932	0.223534	5580-6020
ELF019	15		-31.7	124	1.24	-32.94	124	6.37	0.27	6100-6640	9.88 ± 0.62 ka; 9260-10500 @unit 24	6.33632	0.34716			unit 18 deposited at		9.26354	0.431048	8830-9690
ELF019	15		-31.7	126	1.26	-32.96	126	5.33	0.3	5030-5630		6.26187	0.628048	6.51593	0.607716	unit 24 deposited at		9.88168	0.617191	9260-10500
ELF019	15		-31.7	128	1.28	-32.98	128	6.47	0.36	6110-6830		5.58725	0.487159	5.01918	0.52167
ELF019	15, base		-31.7	130	1.3	-33	130	5.61	0.31	5300-5920		6.63625	0.576796
ELF019	18		-31.7	142	1.42	-33.12	142	9.09	0.42	8670-9510		5.3247	0.555541	4.77632	0.404399
ELF019	18		-31.7	145	1.45	-33.15	145	8.22477	1.69168	6530-9920		9.50012	1.16589	8.73736	0.887518
ELF019	18, base		-31.7	150	1.5	-33.2	150	9.78	0.68	9100-10460		8.22477	1.69168
ELF019	24, base		-31.7	380	3.8	-35.5	380	9.67	0.76	8910-10430		9.22187	0.671017	10.4408	1.11352
ELF020	13		-21.6	210	2.1	-23.7	210	9.79	0.76	9030-10550	9.79 ± 0.76 ka; 9030-10550 @210 cm *discordant with 14C age; U-Th disequilibrium across peat boundary?	9.01691	1.38973	10	0.514127
ELF020	13, base		-21.6	215	2.15	-23.75	215	10.3663	1.11236	9250-11480						silts, immediately beneath peat; discordant with radiocarbon age of 10756 ± 29 BP; U-Th disequilibrium across peat boundary?; calculated assuming late deposition of excess U		9.79	0.76	9030-10550
ELF020	14		-21.6	220	2.2	-23.8	220	12.7927	1.17371	11620-13970						position of unit 14; development of wetlands above till		13.0182	1.25804	11760-14280
ELF020	14 / 15?		-21.6	225	2.25	-23.85	225	14.783	3.28323	11500-18070
ELF020	15		-21.6	256	2.56	-24.16	256	22.2826	3.62176	18660-25900
ELF020	15, base		-21.6	260	2.6	-24.2	260	13.2611	1.1008	12160-14360
ELF020	16		-21.6	270	2.7	-24.3	270	14.9574	1.64142	13320-16600	13.02 ± 1.2 ka; 11760-14280 @220-225 cm
ELF022	6, mid			91	0.91	-0.91	91	12.6033	1.4246	11180-14030	7.89 ± 0.42 ka; 7470-8310 @155-144 cm
ELF022	6, mid		0	97	0.97	-0.97	97	13.7091	1.3545	12350-15060						Flooding of surface 9; deposition of unit 8		7.88558	0.42035	7470-8310
ELF022	7, base		0	130	1.3	-1.3	130	13.5121	1.5784	11930-15090
ELF022	8, top		0	136	1.36	-1.36	136	13.5567	1.71328	11840-15270
ELF022	8		0	140	1.4	-1.4	140	7.95063	2.13392	5820-10080
ELF022	8		0	145	1.45	-1.45	145	8.32893	0.911704	7420-9240
ELF022	8		0	149	1.49	-1.49	149	7.47976	0.710515	6770-8190
ELF022	8		0	155	1.55	-1.55	155	12.4974	1.36824	11130-13870
ELF022	9, top		0	160	1.6	-1.6	160	11.1683	1.05194	10120-12220
ELF022	10, top		0	190	1.9	-1.9	190	12.9003	1.2727	11630-14170
ELF022	10		0	210	2.1	-2.1	210	12.8413	1.27922	11560-14120
ELF027	2, base			95	0.95	-0.95	95	15.1344	3.22733	11910-18360
ELF027	3, top		0	101	1.01	-1.01	101	16.0475	3.28989	12760-19340						this combination gives equal weighting to the lower samples (units 4 through 16)		10.5338	0.798431	9740-11330
ELF027	3, base		0	115	1.15	-1.15	115	11.2145	2.00171	9210-13220						includes sample from base of unit 3		10.6272	0.741612	9890-11370
ELF027	4, base		0	130	1.3	-1.3	130	9.48447	1.42292	8060-10910								11.2921	1.31531	9980-12610
ELF027	5, base		0	172	1.72	-1.72	172	11.5332	1.90895	9620-13440	11.53 ± 1.91 ka; 9620-13440 @172 cm
ELF027	6		0	176	1.76	-1.76	176	11.0741	1.81488	9260-12890	11.07 ± 1.81 ka; 9260-12890 @176 cm; 172-176cm: 11.29 ± 1.32 ka; 9980-12610 BP
ELF027	14, top		0	419	4.19	-4.19	419	10.9052	1.94448	8960-12850
ELF027	14, top		0	440	4.4	-4.4	440	10.4552	2.07504	8380-12530
ELF031A	6, base		-28	100	1	-29	100	9.27932	1.12368	8160-10400	9.28 ± 1.12 ka; 8160-10400 BP
ELF031A	7, top		-28	105	1.05	-29.05	105	8.09945	0.874969	7220-8970	8.10 ± 0.87 ka; 7220-8970 BP
ELF031A	7, base		-28	110	1.1	-29.1	110	9.33335	1.0581	8280-10390	9.33 ± 1.06 ka; 8280-10390 BP
ELF031A	8, top		-28	119	1.19	-29.19	119	10.2343	1.07293	9160-11310	10.23 ± 1.07 ka; 9160-11310 BP
ELF031A	11		-28	290	2.9	-30.9	290	14.7794	2.58362	12200-17360	14.78 ± 2.58 ka; 12200-17360 BP
ELF031A	12, top		-28	305	3.05	-31.05	305	11.5718	1.48719	10080-13060	11.57 ± 1.49 ka;10080-13060 BP
ELF031A	12		-28	310	3.1	-31.1	310	13.1828	1.68538	11500-14870	13.18 ± 1.69 ka; 11500-14870 BP
ELF034	1, base		-17	15	0.15	-17.15	15	2.25	0.24	2010-2490
ELF034	3, top		-17	38	0.38	-17.38	38	13.99	1.26	12730-15250		2.25562	0.316173
ELF034	17, base		-17	186	1.86	-18.86	186	8.2	0.91	7290-9110		13.0865	1.50991
ELF034	18, base		-17	195	1.95	-18.95	195	8.84	0.48	8360-9320				8.1673	2.04564
ELF034	20, base		-17	215	2.15	-19.15	215	12.36	0.66	11700-13020	12.36 ± 0.66 ka; 11700-13020 BP	9.3138	2.17934	8.12672	2.02415
ELF034	21, base		-17	226	2.26	-19.26	226	14.13	1.49	12640-15620	14.13 ± 1.49 ka; 12640-15620 BP	12.2981	2.58187	12.4533	2.57829
ELF034	22, base		-17	235	2.35	-19.35	235	14.92	1.86	13060-16780		14.1546	3.21181	14.2567	4.00686
ELF039	5,base			255	0	0		7.70967	0.963655	6750-8670	7.71 ± 0.96 ka; 6750-8670 @ 255cm	14.9159	3.62455
ELF039	6, top		0	265	0	0		8.77329	1.28631	7490-10060	8.77 ± 1.29 ka; 7490-10060 @ 265cm
ELF039	7		0	329	0	0		8.78313	1.07673	7710-9860	8.97 ± 0.75 ka; 8220-9720 @ 335-329 cm
ELF039	7		0	335	0	0		9.13948	1.04384	8100-10180								8.96683	0.749464	8220-9720
ELF039	7		0	340	0	0		13.0356	2.57051	10470-15610	13.04 ± 2.57 ka; 10470-15610 @ 340 cm
ELF042	4			75-80	0.775	-0.775	77.5	4.87254	0.45223	4420-5320	5.19 ± 0.17 ka; 5020-5360 @75-80 cm
ELF042	4		0	80	0.8	-0.8	80	5.63098	0.497413	5130-6130	5.02 ± 0.16 ka; 4860-5180 @90-98 cm					top of brackish tidal mudflats, as preserved in core 42	ELF42/75-80, ELF42/8	5.19	0.17	5020-5360
ELF042	4		0	90	0.9	-0.9	90	5.51562	0.479367	5040-5990	5.57 ± 0.15 ka; 5420-5720 @370-380 cm						ELF42/9, ELF42/10	5.02	0.16	4860-5180
ELF042	4		0	98	0.98	-0.98	98	4.511	0.423952	4090-4930	5.49 ± 0.16 ka; 5330-5640 @380-390 cm					base of brackish tidal mudflats, as preserved in core 42	ELF42/37, ELF42/375-380	5.57	0.15	5420-5720
ELF042	10		0	370	3.7	-3.7	370	5.75042	0.518198	5230-6270							ELF42/37, ELF42/375-380, ELF42/39	5.49	0.16	5330-5650
ELF042	10		0	375-380	3.775	-3.775	377.5	5.46007	0.478281	4980-5940
ELF042	10		0	390	3.9	-3.9	390	5.2786	0.49534	4780-5770
ELF045	5, top			160	1.6	-1.6	160	7.44	0.67	6770-8110	8.19 ± 0.96 ka; 7230-9150 @ 160-17 cm
ELF045	5		0	170	1.7	-1.7	170	9.12	1.91	7210-11030	10.97 ± 0.53 ka; 10440-11500 @ 540-545 cm			7.42981	0.75536	top of 'tidal' mudflats	ELF045/18 and /19	8.19	0.96	7230-9150
ELF045	8, base		0	540	5.4	-5.4	540	11.01	0.89	10120-11900	13.39 ± 0.85 ka; 12540-14240 @ 550-555 cm					base (as recorded in core) of open estuary	ELF045/61 and /62	10.97	0.53	10440-11500
ELF045	8, base		0	545	5.45	-5.45	545	11.02	0.67	10350-11690		10.7085	1.20991	10.4456	1.10884		ELF045/63 and /64	13.39	0.85	12540-14240
ELF045	8, base		0	550	5.5	-5.5	550	13.38	1.08	12300-14460		10.0498	1.10239	12.0428	1.48455
ELF045	8, base		0	555	5.55	-5.55	555	13.42	1.37	12050-14790		12.4914	1.61842	15.0851	2.44128
ELF047	4, near top			398	3.98	-3.98	398	8.62	0.33	8290-8950	8.62 ± 0.33 ka; 8290-8950 @ 398 cm	12.4914	1.9986	22.1947	6.51694
ELF047	6, top		0	426	4.26	-4.26	426	11.22	0.54	10680-11760	9.07 ± 0.26 ka; 8800-9330 @ 437-444 cm; 9.11 ± 0.23 ka; 8870-9340 @ 431-444 cm					accumulation on ‘storm beach’	ELF047/46, /47	9.06566	0.263535	8800-9330
ELF047	6, base		0	431	4.31	-4.31	431	9.25	0.5	8750-9750							ELF047/45, /46, /47	9.10574	0.233134	8870-9340
ELF047	7, top		0	437	4.37	-4.37	437	9.42	0.78	8640-10200
ELF047	7, mid		0	444	4.44	-4.44	444	9.02	0.28	8740-9300
ELF047	7		0	451	4.51	-4.51	451	12.82	1.28	11540-14100
ELF049	3, base			155	1.55	-1.55	155	10.2851	1.23509	9050-11520	9.16 ± 1.10 ka; 8060-10250 @155-159cm
ELF049	3, base		0	159	1.59	-1.59	159	8.09064	1.19973	6890-9290	29.7 ± 3.11 ka; 26590-32810 >180cm (assuming units at 414 and 195 cm well-bleached)	10.2851	1.23509			base of medium to coarse, ‘marine’ sands; TAQ for erosion of unit 4	ELF049/20, /21	9.15604	1.09772	8060-10250
ELF049	4, top		0	175	1.75	-1.75	175	35.5817	6.35854	29220-41940		8.09064	1.19973			assuming units at 414 and 195 cm well-bleached; sands accumulated from c.29 ka	ELF049/27, /56	29.7013	3.10966	26590-32810
ELF049	4		0	180	1.8	-1.8	180	38.9692	4.88743	34080-43860		35.5817	6.35854			deposition of unit 4 and unit 6 sands; sand accumulation no older tha	ELF049/24, /25, /26, /27, /48, /49, /51, /54	37.3818	2.93956	34440-40320
ELF049	4		0	185	1.85	-1.85	185	43.6436	5.34002	38300-48980		38.9692	4.88743
ELF049	4		0	195	1.95	-1.95	195	29.7793	3.63429	26150-33410				43.6436	5.34002
ELF049	6		0	370	3.7	-3.7	370	49.6146	6.52689	43090-56140				29.7793	3.63429
ELF049	6		0	380	3.8	-3.8	380	48.359	11.4904	36870-59850		49.6146	6.52689
ELF049	6		0	400	4	-4	400	41.2636	8.97879	32280-50240		48.359	11.4904
ELF049	6, base		0	410	4.1	-4.1	410	42.8298	6.36915	36460-49200		41.2636	8.97879
ELF049	8, top		0	414	4.14	-4.14	414	29.488	6.0083	23480-35500		42.8298	6.36915
ELF049	8, base		0	422	4.22	-4.22	422	83.1426	7.34326	75800-90490		29.488	6.0083
ELF051	3		-27.5	80	0.8	-28.3	80	10.19	0.5	9690-10690	10.18 ± 0.47 ka; 9720-10650 @ 80 cm	83.1426	7.34326
ELF051	3, base		-27.5	83	0.83	-28.33	83	11.2	0.8	10400-12000	11.09 ± 0.47 ka; 10630-11560 @ 83-85 cm	10.1355	1.26649	10.5125	1.15234			10.1827	0.465069	9720-10650
ELF051	3, base		-27.5	85	0.85	-28.35	85	10.99	0.78	10210-11770	11.30 ± 0.98 ka; 10320-12280 @ 90 cm	11.0226	1.05041					11.1349	0.636437	10500-11770
ELF051	4, top		-27.5	90	0.9	-28.4	90	11.48	1.36	10120-12840		11.2611	1.51462	9.68533	1.4092			11.0468	0.693449	10350-11740
ELF051	4		-27.5	93	0.93	-28.43	93	11.63	0.97	10660-12600		11.0979	1.4195	14.8968	4.7519			11.2971	0.982027	10320-12280
ELF051	7		-27.5	138	1.38	-28.88	138	12.12	0.9	11220-13020	12.12 ± 0.90 ka; 11120-13020 @ 138cm			11.478	1.79456
ELF051	8		-27.5	141	1.41	-28.91	141	13.11	0.82	12290-13930	13.11 ± 0.82 ka; 12290-13930 @ 141cm			12.1182	1.47149			11.0946	0.468891	10630-11560
ELF053	2, top			55	0.55	-0.55	55	14.8106	3.52955	11280-18340	14.81 ± 3.53 ka; 11280-18340 @ 55cm			13.1067	1.27731
ELF053	2		0	65	0.65	-0.65	65	25.2143	4.53272	20680-29750
ELF053	2		0	75	0.75	-0.75	75	27.5459	4.22678	23320-31770
ELF053	4		0	231	2.31	-2.31	231	22.3936	2.29062	20100-24680	22.39 ± 2.29 ka; 20100-24680 @ 231cm
ELF053	5, top		0	241	2.41	-2.41	241	45.9897	5.28291	40710-51270	45.99 ± 5.28 ka; 40710-51270 @ 241cm
ELF053	5		0	251	2.51	-2.51	251	58.8451	8.11434	50730-66960	58.85 ± 8.11 ka; 50730-66860 @ 251cm
ELF054	2, top		-22.5	31	0.31	-22.81	31	5.73	0.26	5470-5990	5.73 ± 0.26 ka; 5470-5990 @31cm
ELF054	2		-22.5	52	0.52	-23.02	52	5.70531	0.795805	4910-6500	5.71 ± 0.80 ka; 4910-6500 @53cm			5.93953	0.799581	top unit 2, 31-52cm depth		5.49401	0.461606	5030-5960
ELF054	2		-22.5	82	0.82	-23.32	82	6.42	0.88	5540-7300	6.42 ± 0.88 ka; 5540-7300 @82			5.70531	0.795805	unit 2, 82-99 cm depth		5.77607	0.499304	5280-6280
ELF054	2		-22.5	85	0.85	-23.35	85	6.02861	1.08623	4940-7110	6.03 ± 1.09 ka; 4940-7110 @85			6.55658	1.1881	unit 2, 135-155, 82-99 cm depth		5.24339	0.452327	4790-5700
ELF054	2		-22.5	99	0.99	-23.49	99	6.55009	1.05101	5500-7600	6.55 ± 1.05 ka; 5500-7600 @99cm			6.02861	1.08623	base unit 2, 215-235 , 82-99 cm depth		5.45143	0.326245	5130-5780
ELF054	2		-22.5	135	1.35	-23.85	135	6.04756	0.818755	5230-6870	6.05 ± 0.82 ka; 5230-6870 @135cm			6.55009	1.05101
ELF054	2		-22.5	155	1.55	-24.05	155	4.94135	0.73602	4210-5680	4.94 ± 0.74 ka; 4210-5680 @155			6.04756	0.818755
ELF054	2		-22.5	215	2.15	-24.65	215	5.23304	0.637788	4600-5870	5.23 ± 0.64 ka; 4600-5870 @215cm			4.94135	0.73602
ELF054	2		-22.5	225	2.25	-24.75	225	5.58052	0.556397	5020-6140	5.58 ± 0.56 ka; 5020-6140 @225cm			5.23304	0.637788
ELF054	2, base		-22.5	235	2.35	-24.85	235	5.95421	0.680913	5270-6640	5.95 ± 0.68 ka; 5270-6640 @235cm			5.58052	0.556397
ELF059	2			40	0.4	-0.4	40	6.37502	0.754678	5620-7130				5.95421	0.680913
ELF059	2		0	52	0.52	-0.52	52	6.76288	0.751328	6010-7510						end of accumulation on tidal mudflats	ELF59/3 and 59/4	6.56982	0.532449	6040-7100
ELF059	5		0	320	3.2	-3.2	320	5.02701	0.475577	4550-5500	5.03 ± 0.48 ka; 4550-5500 @320cm					switch from terrestrial to littoral setting	ELF59/32, 59/33 and 59/34	6.84651	0.55692	6290-7400
ELF059	6/7 boundary		0	330	3.3	-3.3	330	7.18755	0.80036	6390-7990	7.19 ± 0.80 ka; 6390-7990 @330cm
ELF059	7		0	340	3.4	-3.4	340	6.90453	0.974578	5930-7880	6.90 ± 0.97 ka; 5930-7880 @340cm
ELF059	7		0	350	3.5	-3.5	350	6.58514	0.906847	5680-7490	6.59 ± 0.91 ka; 5680-7490 @350cm

## Sheet: Age-depth method
Where Label includes 14C that indicates more than 1 radiocarbon measurement is represented. This is humic acid and humin pairs.
In all cases where the humic acid and humin pair measurements are not statistically consistent (noted with the addition of the t-test statistic), those measurements were excluded from the modelling and are indicated as being outliers.
There are instances where the model figure clearly shows the combined date is within the 95% probability for that modelled section, but they remain excluded as the argument for inclusion is tenuous and circular.
The net result in these instances is lower precision for the model in those areas.
There are other cases where a 14C or OSL date is indicated as being an outlier, but with no further information. In these cases, the dates are in clear disagreement with the other dates in the model.
With the exception of three dates in the bottom of core ELF034, the outliers that were identified based on their stratigraphic placement were all too old and most likely relate to either reworked organics (14C) or incomplete bleaching (OSL).
The bottom secton of ELF034 is problematic and the chronology produced below 175 cm should be used with caution.
Simiarly, the model for ELF054, below c. 270 cm, is problematic with most of the dates excluded, and should be used with caution.
In both cases, the precision in these areas is greatly reduced, so any conclusions are not likely to be importantly wrong.

## Sheet: 001A
Depth in core (cm)	Label	Event'	Modelled date (cal BP) (95% probability)	Interpretation of depth (if applicable)
95	CERSA-114/20	OSL	5010–3735
100	CERSA-114/22/CERSA-114/21	OSL	6335–5455
105	CERSA-114/23	OSL	7315–6060
110	CERSA-114/24	OSL	7815–6580
117	CERSA-114/25	OSL	outlier
119	Boundary 119	lithostrat transition	8545–7025	end Tsunami deposit/esturaine mudflats
136	CERSA-114/29	OSL	outlier
140	CERSA-114/30	OSL	8720–7280
143	Beta-505683	14C	outlier
146	CERSA-114/31	OSL	8825–7330
150	CERSA-114/32	OSL	8905–7340
151	Boundary 151	lithostrat transition	8935–7340	start Tsunami deposit
155	CERSA-114/33	OSL	10615–7465

## Sheet: 002
Depth in core (cm)	Label	Event'	Modelled date (cal BP) (95% probability)	Interpretation of depth (if applicable)
253	SUERC-85668	14C (shell tpq)	9095–8780
253	Date 253		<8780
263	Date 263		<8780
266	Beta-493393	14C (shell tpq)	9005–8700
275	Date 275		<8865
283.5	Boundary 283.5	lithostrat transition	8915–8580
284	Beta-493394	14C	8910–8755
285	14C - 285 cm	14C	8915–8780
289	Date 289		8975–8820
291	Beta-493395	14C	8995–8850
295	14C - 295 cm	14C	9265–9030
306	Beta-493396	14C	10380–10225
307	Boundary 307	lithostrat transition	10635–10225
314	Date 314		18145–11415
317	14C - 317 cm	14C	outlier (T'=140.2; df=1; T'(5%)=3.8)
317	ELF002-317	OSL	20020–13260
325	Date 325		30820–15845
330	Boundary 330	lithostrat transition	35830–18150
337	ELF002-337	OSL	38195–28155
342	ELF002-342	OSL	42100–31500
358	ELF002-358	OSL	64430–36200

## Sheet: 007
Depth in core (cm)	Label	Event'	Modelled date (cal BP) (95% probability)	Interpretation of depth (if applicable)
20	ELF007-20 (OSL)	OSL	8795–7260
46	ELF007-46 (OSL)	OSL	8805–7520
51	ELF007-51 (OSL)	OSL	8810–7560
56	ELF007-56 (OSL)	OSL	8820–7595
75	Boundary 75	lithostrat transition	8885–7700
80	ELF007-80 (OSL)	OSL	8910–7825
85	Date 85		8945–7920
86	ELF007-86 (OSL)	OSL	8955–7935
91	Boundary 90	lithostrat transition	9020–8000
91.5	Date 91.5		9025–8015
94.5	Date 94.5		9035–8100
95	ELF007-95 (OSL)	OSL	9040–8105
97.5	Date 97.5		9055–8160
99	ELF007-99 (OSL)	OSL	9070–8190
105	Boundary 105	lithostrat transition	9145–8275
108	Date 108		9145–8290
129	Date 129		9155–8385
165	Date 165		9180–8505
188	Date 188		9210–8555
193	Boundary 193	lithostrat transition	9220–8560
194	14C - 194 cm	14C	outlier (T'=11.5; df=1; T'(5%)=3.8)
200	Boundary 200	lithostrat transition	9245–9065
201	14C - 201 cm	14C	9255–9095
202	14C - 202 cm	14C	9270–9130
204	Date 204		9320–9185
206	14C - 206 cm	14C	9370–9245
210	14C - 210 cm	14C	9435–9345
215	14C - 215 cm	14C	9555–9490

## Sheet: 020
Depth in core (cm)	Label	Event'	Modelled date (cal BP) (95% probability)	Interpretation of depth (if applicable)
176	14C - 176 cm	14C	outlier (T'=5.9; df=1; T'(5%)=3.8)
178	14C - 178 cm	14C	outlier (T'=5.2; df=1; T'(5%)=3.8)
179	14C - 179 cm	14C	9305–9035
184	14C - 184 cm	14C	9405–9145
188	Date 188		9610–9145
190	14C - 190 cm	14C	outlier (T'=17.2; df=1; T'(5%)=3.8)
195	14C - 195 cm	14C	outlier (T'=274.9; df=1; T'(5%)=3.8)
200	14C - 200 cm	14C	outlier (T'=6.5; df=1; T'(5%)=3.8)
200.5	Boundary 200.5	lithostrat transition	10330–9145
210	ELF20-210	OSL	outlier
215	ELF20-215	OSL	outlier
215.5	Boundary 215.5	lithostrat transition	13220–9430
220	ELF20-220 (interest)	OSL	13850–10705
223	Boundary 223	lithostrat transition	14665–11070
225	ELF20-225	OSL	14670–11150
250	Date 250		15100–11875
256	ELF20-256	OSL	outlier
260	ELF20-260	OSL	15410–12040
270	ELF20-270	OSL	15820–12120

## Sheet: 034
Depth in core (cm)	Label	Event'	Modelled date (cal BP) (95% probability)	Interpretation of depth (if applicable)
15	ELF35-15 (OSL)	OSL	2690–1720
36	Boundary 8	lithostrat transition	7840–1990
38	ELF35-38 (OSL)	OSL	outlier
50	Boundary 7	lithostrat transition	9000–5940
51	14C - 51 cm	14C	9005–8770
53	Boundary 6	lithostrat transition	11165–8890
54	Boundary ???	lithostrat transition	11435–10910
61	Date 61		11550–11095
70	14C - 70 cm	14C	11695–11320
90	14C - 90 cm	14C	outlier
110	14C - 110 cm	14C	12540–12485
130	14C - 130 cm	14C	12900–12780
149	14C - 149 cm	14C	13295–13120
160	Boundary 5	lithostrat transition	13545–13340
163	14C - 163 cm	14C	13590–13465
172	14C - 172 cm	14C	14005–13610
177	Date 177		14285–13660
178	Boundary 4	lithostrat transition	14340–13670
180	14C - 180 cm	14C	outlier (T'=26.7; df=1; T'(5%)=3.8)
185	14C - 185 cm	14C	outlier (T'=126.2; df=1; T'(5%)=3.8)
186	ELF35-186 (OSL)	OSL	outlier
187	Boundary 3	lithostrat transition	23865–13700
193	14C - 193 cm	14C	outlier (T'=36.6; df=1; T'(5%)=3.8)
195	ELF35-195 (OSL)	OSL	outlier
202	14C - 202 cm	14C	outlier (T'=79.6; df=1; T'(5%)=3.8)
209	14C - 209 cm	14C	outlier (T'=287.9; df=1; T'(5%)=3.8)
210	Boundary 2	lithostrat transition	30290–13940
215	ELF35-215 (OSL)	OSL	outlier
219	Date 219		33955–14155
225	Boundary 1	lithostrat transition	36350–14215
226	ELF35-226 (OSL)	OSL	outlier
235	ELF35-235 (OSL)	OSL	outlier

## Sheet: 034A
Depth in core (cm)	Label	Event'	Modelled date (cal BP) (95% probability)	Interpretation of depth (if applicable)
135	SUERC-85708: 135 shell	14C	8875–8565
146	Date 146		8925–8625
152	Boundary 152	lithostrat transition	8975–8645
160	Boundary 160	lithostrat transition	9015–8780
166	Date 166		9020–8880
170	14C - 170 cm	14C	9030–8970
172	Date 172		9090–8975
183	Date 183		9310–8985
185	Boundary 185	lithostrat transition	9350–8985
195	14C - 195 cm	14C	9445–9295
202	Date 202		9905–9315
209	Boundary 209	lithostrat transition	10385–9325
219	Date 219		10720–9665
225	225	date'	10970–9865
261	261	date'	12020–11240
282	282	date'	12560–12110
293	14C - 293 cm	14C	12740–12665

## Sheet: 051
Depth in core (cm)	Label	Event'	Modelled date (cal BP) (95% probability)	Interpretation of depth (if applicable)
80	ELF51-80 (OSL)	OSL	outlier
83	ELF51-83 (OSL)	OSL	outlier
85	ELF51-85 (OSL)	OSL	outlier
88	Boundary	lithostrat transition	10150–9630
90	ELF51-90 (OSL)	OSL	outlier
93	ELF51-95 (OSL)	OSL	outlier
94	14C - 94 cm	14C	10155–9795
96	96	date'	10160–9885
103	14C - 103 cm	14C	10195–9940
116	14C - 116 cm	14C	outlier (T'=30.0; df=1; T'(5%)=3.8)
120	120	date'	10885–9940
132	Boundary	lithostrat transition	11400–9945
133	14C - 133 cm	14C	outlier (T'=99.3; df=1; T'(5%)=3.8)
138	ELF51-138 (OSL)	OSL	12280–11265
141	ELF51-141 (OSL)	OSL	outlier
141	14C - 141 cm	14C	12420–12100

[truncated: 1 more sheets: 054]
