# Supplementary material for: Pleistocene-Holocene sedaDNA reconstruction of Southern Doggerland reveals early colonization before inundation consistent with northern refugia.
Source: Research Square preprint supplement (doi:10.21203/rs.3.rs-3296992/v1), 2023-09-21
Supplement: Supplementary file 4 [file 52a40933603bb18ab4338d7d.xlsx]

## Sheet: Sheet1
	Contextual sample	Anchor sample	phylogenetic distance	date (yrs BP)
	ELF47A 354	ELF51 292	0.0248864	>13310
	ELF47A 256	ELF45 522	0.0326543	>11010
	ELF47A 150	ELF47A 256	0.185185	>11010
	ELF47A 50	ELF45 90	0.00567716	>7440
	ELF44 195	ELF39 460	0.0140065	>13040
	ELF44 175	ELF39 225	0.0020939	<7710
	ELF44 137	ELF54 58	0.00601448	6000–5230 (95% range age modelled date)
	ELF44 115	ELF34A 63	0.0693346	circa 6000
	ELF44 90	ELF39 105	0.00245665	<7710
	ELF44 50	-	-	-
	ELF44 25	-	-	-
	ELF44A 97	ELF39 175	0.00188801	<7710
	ELF41 295	ELF39 145	0.0380708	<7710
	ELF41 180	ELF39 145	0.0399856	<7710
	ELF41 110	ELF39 105	0.015499	<7710
	ELF41 87	ELF39 50	0.0458154	<7710
	ELF40A 487	-	-	-
	ELF40A 350	ELF19 94	0.00132605	>5970
	ELF40A 298	ELF42 350	0.00472132	<5750
	ELF40A 208	-	-	-
	ELF40A 197	-	-	-
	ELF40A 112	ELF42 65	0.0272176	<4510
	ELF40A 95	-	-	-
	ELF60 465	ELF54 140	0.00465348	6145–5365 (95% range age modelled date)
	ELF60 420	ELF59 337	0.00150836	<7120, >6900
	ELF60 350	ELF59 280	0.0144937	<6900
	ELF60 250	ELF59 230	0.00547658	<6900
	ELF59A 355	ELF3 332	0.0313411	>10710
	ELF59A 320	-	-	-
	ELF59A 250	ELF3 332	0.134408	>10710
	ELF59A 190	ELF3 332	0.0369952	>10710
	ELF59A 135	ELF3 332	0.0478193	>10710
	ELF6 95	ELF59 359	0.0323674	>7120
	ELF6 66	ELF3 180	0.0312963	<7950
	ELF6 39	ELF1A 95	0.0379085	<6030
	ELF4 273	EF1A 348	0.037449	7189
	ELF4 240	-	-	-
	ELF4 198	ELF1A 104	0.165028	<7160
	ELF4 151	ELF1A 104	0.0654138	<7160
	ELF4 84	ELF1A 95	0.0245071	<6030
	ELF4 50	-	-	-
Table S12 Contextual anchors of undated sediments to dated sediments by plant guild similarity and proximity
