# Supplementary material for: Pleistocene-Holocene sedaDNA reconstruction of Southern Doggerland reveals early colonization before inundation consistent with northern refugia.
Source: Research Square preprint supplement (doi:10.21203/rs.3.rs-3296992/v1), 2023-09-21
Supplement: Supplementary file 6 [file 73d0be5bffb6ff3920a41f6f.xlsx]

## Sheet: Sheet1
Core	ELF53	ELF49	ELF47	ELF47A	ELF51	ELF31	ELF31A	ELF19	ELF44	ELF44A	ELF42	ELF41	ELF40A	ELF39	ELF54	ELF34	ELF34A	ELF33	ELF33A	ELF32A	ELF60	ELF59	ELF59A		ELF3	ELF5A	ELF5B	ELF6	ELF4	ELF1A	ELF2	ELF9	ELF7	ELF20		ELF27		ELF22
sample
1 to 2		0.0257389	4.59e-28		0.0127977		2.31781e-121	0.00481553	3.27771e-13		2.936e-07	3.75617e-11	2.41396e-05	0.00943895	0.00440835		6.22e-09			6.72006e-15	1.30564e-05	1.40139e-09	0.00048853		1.9239e-08			0.0214271	0.000861337	7.87731e-10		4.23189e-05	1.75e-17	4.88e-05		7.15779e-62
2 to 3			2.06e-13		0.0291982		3.5517e-13	2.09914e-09	1.42653e-20		1.05956e-09	1.34714e-13	0.00440261	1.47e-11	0.208394		4.21e-12	1.47489e-06		3.77265e-11	1.42757e-10	3.13276e-10	2.24773e-09		0.000186941			0.339602	0.000267595	0.00236982			1.11e-07	1.64e-14		5.13164e-36
3 to 4			7.83e-08		1.36e-11		5.85889e-10	0.00238688			1.37899e-11	1.91177e-16	3.09859e-15	1.66e-32	1.1176e-14		0.00096467	1.86066e-12	0.0568934	3.97517e-05	0.116411	7.21956e-19	9.3659e-06				0.00394025		0.259653	0.0452933			9.32e-11	3.48e-06
4 to 5			1.24e-10		1.73e-07		1.09592e-05						8.43085e-10	3.75e-82			2.84e-12	2.73875e-05		7.75375e-07		1.34484e-19	4.63412e-11			0.00298893	3.99906e-06		7.41863e-06	3.61336e-12			3.1e-127	0.0494547
5 to 6			0.0597028		1.77e-55		5.40001e-34	1.24863e-07					0.347114	2.4e-54			0.135847	1.15316e-05		3.40325e-75		7.71876e-10			4.97808e-07		0.00128921		0.00916575				1.69e-39	0.0373156
6 to 7			5.57184e-24		4.66e-202		5.76251e-35	7.72118e-132						2.99e-13				0.00533218				3.33624e-21									2.49647e-06		6.45e-46
7 to 8			5.55391e-29		2.21e-78		0.0834757	4.16409e-30						1.38e-29				0.00759387									0.0905858			8.50623e-11	0.222984		0.00754193	0.303255
8 to 9			3.49806e-07					1.51618e-72						4.7e-22				0.0393324												9.85593e-05			4.17e-34	3.42e-14
9 to 10			1.80289e-12					1.80354e-57						2.19226e-37
10 to 11			1.03288e-12					3.5e-06						4.6685e-28
11 to 12			0.00147856					5.34e-198						2.08093e-10																3.90439e-05
12 to 13								3.35805e-44						2.12035e-09
13 to 14								1.51568e-10						1.02113e-36
14 to 15								4.1e-09						1.74e-05
15 to 16
Table S8 Probabilities of taxa from adjacent core samples being drawn from the same underlying distribution. Lowest probabilities shown. Grey indicates insufficient data for this analysis.
