# Supplementary material for: Pleistocene-Holocene sedaDNA reconstruction of Southern Doggerland reveals early colonization before inundation consistent with northern refugia.
Source: Research Square preprint supplement (doi:10.21203/rs.3.rs-3296992/v1), 2023-09-21
Supplement: Supplementary file 7 [file 759b2f5e2d6a8fdf6865bbe0.xlsx]

## Sheet: Sheet1
		Late Pleistocene	Allerød	Younger Dryas	Pleistocene/ Holocene boundary	Early Holocene I	Early Holocene II	Early Holocene III	Early Holocene IV	Tsunami period	Mid Holocene I	Mid Holocene II	Late Holocene
	insecure samples	7	3	1	8	4	4	0	0	4	3	3	6
	species	13900-40000	12900-13900	11700-12900	10500-11700	9500-10500	9000-9500	8500-9000	8300-8500	8000-8300	7000-8000	6000-7000	3000-6000
	Salix	ELF49-361,295 ELF2-325,314	ELF44-195 ELF20-250	ELF20-220	ELF45-522 ELF59A-355 ELF3-332 ELF27-177,174,160	ELF31A-202,177,152,123	ELF31A-77,58			ELF1A-138,112	ELF44-175 ELF20-64	ELF39-105 ELF34A-50	ELF45-25 ELF39-75,50
	Betula				ELF59A-355 ELF27-177,174	ELF31A-177,152,123	ELF31A-77			ELF1A-138,112		ELF39-105	ELF39-75,50
	Alnus		ELF5B-71		ELF33A-126 ELF59A-355 ELF3-332 ELF27-174,160	ELF31A-202,177,123	ELF31A-77,58					ELF39-105 ELF34A-50	ELF45-25 ELF39-75,50
	Quercus		ELF44-195		ELF33-187 ELF33A-126 ELF3-332 ELF59A-355 ELF27-174		ELF31A-58			ELF1A-138	ELF44-175	ELF39-105
	Corylus		ELF44-195		ELF59A-355 ELF3-332 ELF27-174,160					ELF1A-138		ELF39-105	ELF45-25
	Tilia				ELF27-174,160					ELF1A-138		ELF39-105
	Ulmus		ELF44-195		ELF33-187 ELF59A-355 ELF3-332					ELF1A-138		ELF39-105
	Juglans				ELF31A-281								ELF39-50
	Pinus/Picea	ELF49-361			ELF59A-355
	Dryas	ELF49-295					ELF31A-77
	Table S15. Species presence in insecure sediments likely to be affected by sediment influxes
