# Supplementary material for: Pleistocene-Holocene sedaDNA reconstruction of Southern Doggerland reveals early colonization before inundation consistent with northern refugia.
Source: Research Square preprint supplement (doi:10.21203/rs.3.rs-3296992/v1), 2023-09-21
Supplement: Supplementary file 9 [file bb765fa80821ade7d6b2b8a4.xlsx]

## Sheet: Sheet1
				Late Pleistocene	Allerød	Younger Dryas	Pleistocene/ Holocene boundary	Early Holocene I	Early Holocene II	Early Holocene III	Early Holocene IV	Tsunami period	Mid Holocene I	Mid Holocene II	Late Holocene
			secure samples	13	14	2	20	19	26	35	6	0	24	30	19
Guild	guild colour	guild influence	Guild nature	13900-40000	12900-13900	11700-12900	10500-11700	9500-10500	9000-9500	8500-9000	8300-8500	8000-8300	7000-8000	6000-7000	3000-6000
18		103.09	shallow marine/ marsh		ELF39-460,415,384,355 ELF51-310,292,255,215,196,151 ELF47A-354		ELF45-503,475,450 ELF47A-256,150 ELF33-176,155 ELF33A-111 ELF59A-320,250,190,135	ELF19-365,342,310,265 ELF45-430,425,346,310,275,252 ELF31-56,43 ELF33-118 ELF32A-177,153,117	ELF19-238,206,195,170 ELF45-225,180 ELF47-386 ELF33A-50 ELF32A-95,74.47 ELF9-235 ELF20-165,139,111 ELF7-204	ELF39-321,275 ELF47-350,325,274,241,205,175,150 ELF34A-146 ELF1A-310,282,247,212,167 ELF2-289,263 ELF9-180,140,90,70 ELF7-188,165,129,108,97.5, 94.5,91.5	ELF47-115,70,50,25 ELF20-85 ELF7-85		ELF34A-126,81 ELF39-250,225 ELF45-145,105 ELF33-75,46 ELF59-378,359 ELF1A-348,104 ELF4-273,240,198,151 ELF6-95,66 ELF3-180,150,130	ELF19-94,70 ELF45-90,50 ELF41-295,180,110 ELF40A-487,350 ELF54-268,182,140 ELF60-420,350,250 ELF59-337,280,270,230,210 ELF6-39 ELF1A-95 ELF4-84 ELF47A-50 ELF39-175,145 ELF44A-97	ELF19-33 ELF34A-63 ELF42-350,250,151,65 ELF44-137,115,90 ELF41-87 ELF54-58 ELF40A-298,208,197,112,95 ELF2-229,206 ELF4-50
26		66.2729	Willow woodland	ELF53-214 ELF34-202,177 ELF3-340 ELF5A-76,70 ELF5B-145,130,110,90	ELF51-310,292,255,214,196,151 ELF39-485,460,415,384,355 ELF54-330 ELF5A-61 ELF47A-354	ELF34A-282 ELF51-120	ELF47A-256 ELF45-503,475,450 ELF19-400 ELF34A-262 ELF59A-320,250,190,135 ELF33-203,195,176,155 ELF33A-111,98,70 ELF51-96	ELF45-430,405,375,346,275,252 ELF19-365,342,310,265 ELF54-315 ELF31-56,43 ELF33-118 ELF32A-177,153 ELF20-188	ELF47-386 ELF45-225,180 ELF31A-107,88 ELF19-238,206,195,170,146,134 ELF54-291 ELF34A-183,172 ELF32A-95,74,47 ELF9-265 ELF7-204 ELF20-139,111	ELF47-350,325,274,241,205,175,150 ELF39-321,275 ELF5A-50 ELF1A-310,282,212,167 ELF2-289 ELF9-90 ELF7-204,188,165,129,108,97.5,94.5,91.5	ELF47-115,70,50,25 ELF20-85 ELF7-85		ELF45-145,105 ELF39-250,225 ELF34A-126,81 ELF33-75,46 ELF60-420 ELF59-378,359 ELF6-95,66 ELF4-273,240,198,151 ELF1A-348,104 ELF3-236,180,150,130	ELF45-90,50 ELF19-119,94,70 ELF44A-97 ELF41-295,180,110 ELF40A-487,350 ELF54-268,182,140 ELF60-350,250 ELF59-337,280,270,230,210 ELF6-39 ELF4-84 ELF60-420,350,250 ELF1A-95 ELF47A-50 ELF39-175,145	ELF19-33 ELF42-350,250,151,65 ELF34A-63 ELF44-137,115,90 ELF41-87 ELF54-58 ELF40A-298,208,197,112,95
12		37.0715	meadow/marsh	ELF34-202 ELF5A-76,70 ELF5B-145,130,110,90	ELF51-310,292,255,214,196,151 ELF39-460,415,384,355 ELF5A-61 ELF47A-354	ELF51-120	ELF45-503,475 ELF19-400 ELF33-203,195,176,155 ELF33A-111,98,70 ELF59A-320,250,190,135 ELF51-96	ELF45-430,405,375,346,275,252 ELF19-365,342,310,265 ELF33-118 ELF31-56 ELF32A-177,153,117	ELF47-386 ELF45-225 ELF31A-107,88 ELF19-238,206,195,170,146,134 ELF34A-172 ELF54-291 ELF32A-95,74,47 ELF5B-59 ELF7-204 ELF20-165,139,111	ELF47-350,325,274,241,205,175,150 ELF39-321,275 ELF5A-50,42 ELF5B-37 ELF1A-310,247,212,167 ELF2-289 ELF7-188,165,129,108,97.5,94.5,91.5	ELF47-115,70,50,25 ELF7-85		ELF45-145,105 ELF39-250,225 ELF34A-126 ELF59-378,359 ELF3-291,236,180,150,130 ELF6-95,66 ELF4-273,240,198,151 ELF1A-348,104	ELF45-90,50 ELF47A-50 ELF19-94,70 ELF44A-97 ELF41-295,180 ELF39-175,145 ELF60-420,350,250 ELF59-337,280,270,230,210 ELF6-39 ELF4-84 ELF1A-95	ELF19-33 ELF40A-298,208,112,95 ELF42-350,250,151,65 ELF34A-63 ELF44-137,115,90ELF44-137,115,90 ELF54-58 ELF41-87 ELF4-50 ELF2-229
35		19.48	marsh	ELF53-214 ELF5A-76,70 ELF5B-90	ELF51-310,292,255,215,196 ELF47A-354 ELF39-485,460,415,384,355		ELF45-503,475,450 ELF33-203,195,176,155 ELF33A-111,98,70 ELF59A-320,250,190,135 ELF51-96	ELF45-430,375,346,252 ELF031-56 ELF19-365,342,310,265 ELF33-118 ELF32A-177,153,117	ELF47-386 ELF45-225 ELF31A-107,88 ELF19-238,206,170,146,134 ELF34A-172 ELF33A-50 ELF54-291 ELF32A-95,74,47 ELF5B-59 ELF7-204 ELF20-165,139,111	ELF47-350,325,274,241,175,150 ELF39-321,275 ELF5A-50,42 ELF5B-59,37 ELF5B-59,37 ELF1A-247,212,167 ELF2-275 ELF9-90 ELF34A-146 ELF7-188,165,129,108,97.5,94.5,91.5	ELF47-115,70,50,25 ELF20-85 ELF7-85		ELF45-145,105 ELF39-250,225 ELF34A-126,81 ELF33-75,46 ELF59-378,359 ELF3-291,150,130 ELF6-95,66 ELF4-273,240,198 ELF1A-104	ELF45-90,50 ELF47A-50 ELF19-94,70 ELF41-180,110 ELF40A-487,350 ELF39-175,145 ELF54-268,182,140 ELF60-420,350,250 ELF59-337,280,270,230,210 ELF4-84 ELF1A-95	ELF19-33 ELF34A-63 ELF42-350,250,151,65 ELF41-87 ELF54-58 ELF40A-298,208,197,112,95 ELF2-206
46		19.1537	grassland	ELF3-349,340 ELF5A-76,70 ELF5B-130,110,90	ELF51-310,292,255,214,196,151 ELF47A-354 39-460,415,355 ELF5A-61	ELF51-120	ELF45-503,475,450 ELF59A-250,190,135 ELF51-96	ELF45-375,346,275,252 ELF19-365,342,310,265 ELF33-118 ELF32A-153,117	ELF47-386 ELF45-180 ELF19-238 ELF32A-95,74,47	ELF47-350,325,274,241,205,175,150 ELF1A-167 ELF5A-42 ELF5B-37 ELF2-253 ELF7-188,165,94.5	ELF47-115,70,50,25		ELF45-145,105 ELF39-225 ELF3-291,150 ELF6-66	ELF45-50 ELF6-39 ELF39-175 ELF4-84	ELF42-350
33		12.6577	temperate woodland	ELF3-340 ELF5A-76,70 ELF5-145,110,90	ELF51-310,292,255 ELF39-460,415,384,355 ELF5A-61		ELF45-503,475,450 ELF59A-250,190,135 ELF33-203,195,176,155 ELF33A-111 ELF34-61	ELF45-430,375,346,275,252 ELF19-365,342,310,265 ELF33-118 ELF32A-177,153 ELF20-188	ELF47-386 ELF45-225 ELF31A-88 ELF19-238,206,195,170 ELF34A-195 ELF32A-95,74,47 ELF9-235 ELF20-139,111	ELF47-350,274,241,205,175,150 ELF39-321,275 ELF34A-166 ELF1A-247,212,167 ELF2-289 ELF9-90 ELF7-188,165,129,108,97.5,94.5,91.5	ELF47-115,50,25 ELF7-85		ELF45-145,105 ELF39-250,225 ELF34A-126,81 ELF59-359 ELF3-180 ELF4-240,198,151 ELF1A-104	ELF45-50 ELF19-94,70 ELF44A-97 ELF41-295,180 ELF39-175,145 ELF60-250 ELF59-270,230,210 ELF6-39 ELF4-84 ELF1A-95	ELF42-350,250.151,65 ELF34A-63 ELF44-137,115,90 ELF41-87 ELF40A-298,197,112 ELF4-50
8		6.42025	meadow		ELF51-310,292,255,215,196,151 ELF39-460,415,384,355	ELF51-120	ELF45-503,475,450 ELF33-155 ELF59A-250,190,135 ELF51-96	ELF45-430,430,405,375,346,275 ELF19-365.342,310,265 ELF32A-177	ELF47-386 ELF45-252,225,180 ELF31A-107,88 ELF19-238,206,195,170,146,134 ELF34A-183 ELF32A-95 ELF7-204 ELF20-165,111	ELF47-350,325,274,175,150 ELF39-321,275 ELF5A-42 ELF5B-37 ELF1A-212,167 ELF2-253 ELF7-188,165,129,108,97.5,94.5,91.5	ELF47-115,70,50,25 ELF7-85		ELF45-145,105 ELF39-250,225 ELF34A-126,81 ELF59-378,359 ELF3-130 ELF6-95	ELF45-90,50 ELF19-94,70 ELF44A-97 ELF41-180 ELF39-175,145 ELF54-140 ELF34A-63 ELF60-420,350,250 ELF59-337,280,270,230,210	ELF19-33 ELF42-350,250,151,65 ELF44-137,115,90 ELF41-87 ELF40A-112,95
45		6.37336	Elm forest	ELF5A-76,70 ELF5-110,90	ELF51-310,292,214 ELF47A-354 ELF39-460,415,384,355 ELF5A-61		ELF47A-256 ELF45-475 ELF59A-250,190,135 ELF33-195,176 ELF33A-98	ELF45-430,346 ELF31-43 ELF19-365,310,265 ELF33-118 ELF32A-177,153	ELF47-386 ELF45-252 ELF31A-88 ELF19-238,206,170 ELF32A-74,47 ELF7-165,129,97.5,94.5 ELF20-165,139,111	ELF47-150 ELF39-321,275 ELF34A-166 ELF1A-212,167 ELF5A-50 ELF9-330 ELF7-165,97.5,94.5,91.5	ELF47-115,70 ELF20-85 ELF7-85		ELF45-145,105 ELF39-250,275 ELF34A-126.81 ELF59-378,359 ELF6-95 ELF1A-104	ELF45-50 ELF44A-97 ELF41-295,180,110 ELF39-175,145 ELF60-420 ELF59-337,270,230,210 ELF4-84 ELF1A-95	ELF42-350,250,151,65 ELF34A-63 ELF41-87 ELF40-298 ELF44-90
48		4.21724	shrubby heath	ELF34-202	ELF51-310.292,215,196,151 ELF39-415,355		ELF45-475 ELF19-400 ELF59A-190,135 ELF51-96	ELF45-346 ELF31-56 ELF19-365,342,310,265	ELF45-225 ELF31A-88 ELF19-238,206,195,170,146 ELF32A-95	ELF47-350 ELF39-321,275 ELF34A-166 ELF2-289 ELF7-165,97.5,94.5,91.5	ELF47-115,50 ELF20-85		ELF39-250,175 ELF34A-126 ELF22-140	ELF19-94 ELF41-110 ELF44A-97 ELF59-270 ELF60-420 ELF4-84 ELF1A-95	ELF42-250,65 ELF41-87 ELF40A-197 ELF44-90
29		3.79414	disturbed woodland	ELF5-90	ELF51-310,255,214,196,151 ELF39-415		ELF45-503 ELF19-436,400 ELF59A-135 ELF51-96	ELF45-430,375,346 ELF19-365,342,310,265	ELF45-252,180 ELF19-238,206	ELF47-274,241,205,175,150 ELF7-97.5	ELF47-115,70,50,25 ELF7-85		ELF45-145	ELF45-50	ELF19-33
24		1.81065	Hawthorn woodland	ELF5A-76,70 ELF5-145,90	ELF51-310,292,255,196 ELF39-460,415,384,355		ELF45-503,475,450 ELF59A-250,190,135 ELF51-96 ELF33-195,155	ELF45-375,346,275 ELF19-365,310,265 ELF33-118 ELF32A-177	ELF47-386 ELF45-252,225 ELF19-238,206,170,134 ELF32A-95,74,47	ELF47-350,325,274,175,150 ELF39-321,241 ELF1A-212,167 ELF2-289 ELF34A-146 ELF7-188,165,108,97.5,94.5,91.5	ELF47-115,70,50 ELF7-85		ELF45-145,105 ELF39-250,225 ELF34A-126,81 ELF59-378,359 ELF1A-104	ELF45-50 ELF47A-50 ELF19-94,70 ELF44A-97 ELF41-180 ELF39-175,145 ELF59-337,280,270,210 ELF4-84 ELF1A-95	ELF42-350,250.151,65 ELF44-115 ELF40A-298,95 ELF54-58 ELF34A-63
6		0.133911	cold heath		ELF51-310, ELF39-355			ELF19-365,342,310,265	ELF31A-107,88 ELF19-238,206,195,170	ELF7-97.5
28		0.0481263	cold heath/scrub		ELF51-310,292 ELF39-384			ELF19-365,342,310,265	ELF45-225 ELF31A-107,88 ELF19-238,206,170
13		0.027353	disturbed woodland		ELF51-310,255			ELF45-375 ELF19-365,310	ELF45-252 ELF19-238,206	ELF47-175 ELF7-91.5			ELF39-225 ELF1A-104	ELF39-175
Table S13. Guild presence in secure sediments unlikely to be affected by sediment influxes
