# Supplementary material for: Pleistocene-Holocene sedaDNA reconstruction of Southern Doggerland reveals early colonization before inundation consistent with northern refugia.
Source: Research Square preprint supplement (doi:10.21203/rs.3.rs-3296992/v1), 2023-09-21
Supplement: Supplementary file 11 [file d1e4886012ee43e5bdbb5c28.xlsx]

## Sheet: results_table
core	depth 1	depth 2	counts 1	counts 2	taxa contributing	l uni	taxa showing no diffusion	maximum percentage diffusion	influx signal likely
elf19	70	33	114	6	1	0.0472209	1		no
elf19	94	70	3203	114	2	0.0540114	1	24.0977	no
elf19	146	94	22	3203	2	0.0207017	2		no
elf19	170	146	901	22	6	0.0800216	6		no
elf19	195	170	144	901	6	0.102898	2	2.37035	no
elf19	206	195	78	144	1	0.0397016	0	6.30631	no
elf19	238	206	367	78	3	0.0142133	0	15.2423	no
elf19	342	238	186	367	3	0.00149646	0	28.6347	no
elf19	400	342	5	186	1	0.00962204	0	0.52356	no
elf19	436	400	1	5	0		0		no
elf1A	104	95	910	1036	3	0.324197	0	1.0839	no
elf1A	120	104	23	910	2	0.0779982	2		yes
elf1A	126	120	112	23	0		0		yes
elf1A	138	126	51397	112	25	0.238032	21	2.35564	yes
elf1A	167	138	22128	51397	27	0.268292	12	0.00936188	yes
elf1A	212	167	48675	22128	7	0.0127863	0	5.50679	no
elf1A	247	212	10	48675	4	0.107513	2	0.464209	no
elf1A	282	247	14	10	0		0		no
elf1A	310	282	10	14	0		0		no
elf1A	348	310	162	10	1	0.0552244	1		no
elf2	229	206	4	5	0		0		no
elf2	253	229	1	4	0		0		no
elf2	263	253	4	1	0		0		no
elf2	275	263	6	4	0		0		no
elf2	289	275	141	6	1	0.0639987	1		no
elf2	314	289	56	141	1	0.127732	1		yes
elf2	325	314	19	56	0		0		yes
elf20	111	85	25	28	0		0		no
elf20	139	111	50	25	0		0		no
elf20	165	139	3	50	0		0		no
elf20	188	165	16	3	0		0		no
elf20	220	188	30	16	0		0		yes
elf20	250	220	70	30	0		0		yes
elf27	174	160	102692	764	14	0.354814	2	0.506009	yes
elf27	177	174	64	102692	14	1.90565	4	0.246585	yes
elf3	150	130	10	121	1	0.104428	1		no
elf3	180	150	17	10	0		0		no
elf3	236	180	13	17	0		0		no
elf3	291	236	31	13	0		0		no
elf3	332	291	15683	31	15	0.0674411	11	4.66345	yes
elf3	340	332	7	15683	15	0.469459	13	0.667838	yes
elf3	349	340	7	7	0		0		no
elf31	56	43	25	11	0		0		no
elf31A	72	58	8155	6427	15	0.475365	4	0.083824	no
elf31A	88	72	787	8155	14	0.316516	3	0.342327	no
elf31A	107	88	231	787	5	0.0331514	1	3.24315	no
elf31A	123	107	764	231	6	0.191808	2	2.8244	yes
elf31A	152	123	341	764	6	0.117954	2	1.7903	yes
elf31A	177	152	272	341	4	0.210074	1	0.163895	yes
elf31A	202	177	49	272	1	0.0117937	0	3.42679	yes
elf31A	281	202	6	49	0		0		yes
elf32A	74	47	5396	2812	9	0.130846	0	1.5697	no
elf32A	95	74	3654	5396	9	0.0168026	0	40.8532	no
elf32A	117	95	1387	3654	9	0.0288753	0	22.2322	no
elf32A	153	117	2353	1387	6	0.00867935	0	32.0432	no
elf32A	177	153	6396	2353	10	0.356181	6	0.00232434	no
elf33	75	46	23	25	0		0		no
elf33	118	75	3268	23	6	0.0590939	5	0.680295	no
elf33	155	118	53	3268	6	0.0921317	4	0.429913	no
elf33	176	155	207	53	1	0.139035	1		no
elf33	183	176	59	207	1	0.481326	1		yes
elf33	187	183	267	59	0		0		yes
elf33	195	187	54	267	0		0		yes
elf33	203	195	48	54	0		0		no
elf33A	70	50	18	5	0		0		no
elf33A	98	70	42	18	0		0		no
elf33A	111	98	66	42	0		0		no
elf33A	126	111	7	66	0		0		yes
elf33A	158	126	445	7	2	0.0154983	2		yes
elf34	177	61	4	1	0		0		no
elf34	185	177	2	4	0		0		no
elf34	202	185	27	2	0		0		no
elf34	219	202	15	27	0		0		no
elf34A	81	63	524	1839	8	0.426731	6	0.00562968	no
elf34A	126	81	476	524	2	0.00920752	0	28.6919	no
elf34A	146	126	3	476	1	0.0435578	1		no
elf34A	166	146	12	3	0		0		no
elf34A	172	166	5	12	0		0		no
elf34A	183	172	7	5	0		0		no
elf34A	195	183	2	7	0		0		no
elf34A	261	195	1	2	0		0		no
elf34A	282	261	3	1	0		0		no
elf39	321	250	156752	122077	16	0.0052491	0	14.0589	no
elf39	341	321	216	156752	14	0.126493	8	2.68885	yes
elf39	355	341	5311	216	8	0.339427	5	0.249684	yes
elf39	384	355	356	5311	8	0.132589	3	1.67761	no
elf39	415	384	5725	356	8	0.116882	3	2.07538	no
elf39	460	415	2694	5725	9	0.125689	2	0.139489	no
elf39	485	460	18	2694	4	0.0888681	4		no
elf4	84	50	1838	15	2	0.0280629	1	0.0210337	no
elf4	151	84	234	1838	2	0.0150323	0	19.6631	no
elf4	198	151	117	234	1	0.00284109	0	39.886	no
elf4	240	198	18	117	1	0.061225	1		no
elf4	273	240	263	18	1	0.0531326	1		no
elf40A	112	95	116	2203	2	0.0306547	0	44.9852	no
elf40A	192	112	967	116	4	0.0158507	2	20.2438	no
elf40A	208	192	41	967	4	0.221702	2	0.950213	no
elf40A	298	208	1442	41	2	0.0257909	1	3.25907	no
elf40A	350	298	1444	1442	2	0.00145244	0	28.716	no
elf40A	487	350	4	1444	2	0.00697108	1	9.59336	no
elf41	110	87	617	157	2	0.0176083	0	12.5644	no
elf41	180	110	1575	617	2	0.00709422	0	40.6107	no
elf41	295	180	72	1575	2	0.0246184	1	2.74022	no
elf42	151	65	2105	8916	10	0.0133175	1	17.7906	no
elf42	250	151	853	2105	2	0.00157174	0	21.3227	no
elf42	350	250	2671	853	3	0.0144974	0	6.29025	no
elf44	137	90	635	7029	3	0.00961181	0	57.9175	no
elf45	145	90	28984	1759	4	0.0122083	1	29.2762	no
elf45	252	145	3806	28984	4	0.00860128	1	21.5487	no
elf45	346	252	1036	3806	3	0.00502758	0	44.8382	no
elf45	450	346	512	1036	2	0.00139975	0	30.6266	no
elf45	522	450	2058	512	2	0.00420115	0	45.6534	no
elf47	150	70	5522	63	3	0.0439114	1	1.21637	no
elf47	241	150	2694	5522	3	0.00192166	0	39.8713	no
elf47	274	241	405	2694	2	0.00866045	0	60.483	no
elf47	325	274	4531	405	3	0.00938108	0	53.5189	no
elf47	386	325	1882	4531	3	0.00361347	0	41.3057	no
elf47A	150	50	4	1964	2	0.00932236	2		no
elf47A	256	150	20	4	0		0		no
elf47A	354	256	17	20	0		0		no
elf49	361	295	136	1244	5	-0.00214276	1	4.96987	yes
elf5	59	37	5	27	0		0		no
elf5	61.5	59	30	5	0		0		yes
elf5	71	61.5	69	30	0		0		yes
elf5	90	71	483	69	5	0.127576	1	2.73693	yes
elf5	110	90	59	483	5	0.049927	2	11.5195	no
elf5	130	110	27	59	0		0		no
elf5	145	130	77	27	0		0		no
elf51	120	96	11	53	0		0		no
elf51	151	120	19	11	0		0		no
elf51	196	151	222	19	2	0.0355805	1	0.379577	no
elf51	255	196	2362	222	6	0.0558326	0	2.50525	no
elf51	292	255	8483	2362	10	0.142408	3	0.201678	no
elf53	214	179	3	0	0		0		no
elf53	275	214	1	3	0		0		yes
elf53	289	275	19	1	0		0		yes
elf53	336	289	4	19	0		0		yes
elf54	140	58	81	2217	2	0.0020231	0	67.6018	no
elf54	182	140	460	81	2	0.00666233	0	10.875	no
elf54	268	182	31	460	2	0.0268553	1	5.70217	no
elf54	291	268	6	31	0		0		no
elf54	315	291	23	6	0		0		no
elf54	330	315	8	23	0		0		no
elf54	356	330	1	8	0		0		no
elf59	230	210	1404	6243	6	0.195937	1	1.05352	no
elf59	270	230	2572	1404	5	0.098692	1	0.781925	no
elf59	280	270	93	2572	4	0.428914	2	0.526672	no
elf59	337	280	1204	93	2	0.0444354	1	1.34792	no
elf59	359	337	4925	1204	5	0.179672	1	0.975684	no
elf59	378	359	129	4925	5	0.225647	2	0.674758	no
elf59A	190	135	18149	27206	20	0.00662364	0	16.6442	no
elf59A	250	190	21222	18149	16	0.0108056	0	14.5031	no
elf59A	320	250	103	21222	9	0.0160164	4	28.9694	no
elf59A	355	320	55046	103	23	0.0411071	12	22.7586	yes
elf5A	50	42	16	43	0		0		no
elf5A	61	50	15	16	0		0		no
elf5A	70	61	81	15	0		0		no
elf5A	76	70	162	81	1	0.1372	0	3.7037	no
elf6	66	39	115	928	1	0.0103362	0	39.2138	no
elf6	95	66	95	115	1	0.00500847	0	31.9048	no
elf60	350	250	6228	2287	6	0.00782325	1	22.0572	no
elf60	420	350	6348	6228	7	0.0120483	1	14.239	no
elf60	465	420	1887	6348	4	0.00335438	0	40.8697	yes
elf7	91.5	85	9701	9	3	0.553595	2	0.607621	no
elf7	94.5	91.5	11705	9701	3	0.0383252	0	18.7723	no
elf7	97.5	94.5	23304	11705	3	0.0713016	0	18.9503	no
elf7	108	97.5	42	23304	3	0.244508	3		no
elf7	129	108	10	42	0		0		no
elf7	165	129	82	10	0		0		no
elf7	188	165	92	82	1	0.000117987	0	18.3908	no
elf7	204	188	15	92	0		0		no
elf9	90	70	100	10	1	0.110098	1		no
elf9	140	90	1	100	1	0.00430043	1		no
elf9	180	140	7	1	0		0		no
elf9	235	180	4	7	0		0		no
elf9	265	235	4	4	0		0		no
elf9	315	265	0	4	0		0		no
elf9	330	315	1	0	0		0		no
elf19	70	33	72	85	1	0.0192774	0	14.0127	no
elf19	94	70	53211	72	3	0.134066	0	1.77786	no
elf19	119	94	26	53211	3	0.0785555	3		no
elf19	134	119	56	26	0		0		no
elf19	146	134	367	56	2	0.14087	0	4.17453	no
elf19	170	146	16191	367	18	0.206628	10	0.409944	no
elf19	195	170	715	16191	16	0.0438432	0	20.7563	no
elf19	206	195	6402	715	8	0.180209	0	9.67732	no
elf19	238	206	26908	6402	15	0.216797	4	0.0147837	no
elf19	265	238	44636	26908	29	0.12141	0	1.07826	no
elf19	310	265	189036	44636	61	0.156429	12	0.0274434	no
elf19	342	310	9860	189036	57	0.238649	13	0.0217685	no
elf19	365	342	51676	9860	37	0.326219	6	0.0222695	no
elf19	400	365	70	51676	34	0.0479502	26	2.93258	no
elf19	436	400	5	70	0		0		no
elf20	64	30	60	2506	6	0.0782792	3	1.40319	yes
elf20	85	64	136	60	1	0.18265	0	0.510204	yes
elf20	111	85	38	136	1	0.0499788	0	4.5977	no
elf20	139	111	81	38	0		0		no
elf20	165	139	18	81	0		0		no
elf20	188	165	11	18	0		0		no
elf20	220	188	64	11	0		0		yes
elf20	250	220	173	64	1	0.129627	1		yes
elf34A	50	20	342	5950	11	0.115106	3	1.8882	yes
elf34A	63	50	22525	342	6	0.189258	0	5.63312	yes
elf34A	81	63	2964	22525	7	0.48807	2	0.00590638	no
elf34A	126	81	1129	2964	3	0.0408889	1	5.6639	no
elf34A	146	126	17	1129	2	0.0188629	0	39.7393	no
elf34A	166	146	29	17	0		0		no
elf34A	172	166	26	29	0		0		no
elf34A	183	172	3	26	0		0		no
elf34A	195	183	2	3	0		0		no
elf34A	225	195	1	2	0		0		no
elf34A	262	225	2	1	0		0		no
elf34A	282	262	2	2	0		0		no
elf39	50	25	65	259	0		0		yes
elf39	75	50	281	65	1	0.0860937	0	1.44509	yes
elf39	105	75	663319	281	20	0.264117	9	0.0284695	yes
elf39	145	105	14618	663319	21	0.114503	4	0.622312	yes
elf39	175	145	363788	14618	16	0.133658	1	1.07616	no
elf39	225	175	276328	363788	26	0.0972154	2	0.0915662	no
elf39	250	225	125077	276328	24	0.121262	3	1.37651	no
elf39	275	250	124067	125077	15	0.107476	0	1.41646	no
elf39	321	275	161643	124067	18	0.0769284	0	0.569413	no
elf39	355	321	8215	161643	17	0.061298	0	6.53802	no
elf39	384	355	753	8215	7	0.0163579	0	47.464	no
elf39	415	384	9287	753	8	0.0307309	0	29.9454	no
elf39	460	415	5258	9287	10	0.0406451	0	6.27969	no
elf39	485	460	20	5258	4	0.0942593	4		no
elf44	50	25	12	4	0		0		yes
elf44	90	50	12205	12	4	0.077766	2	0.742144	yes
elf44	115	90	5049	12205	5	0.251013	1	0.0805367	no
elf44	137	115	4835	5049	4	0.242779	1	0.183477	no
elf44	175	137	523	4835	3	0.0121263	0	51.479	yes
elf44	195	175	4893	523	5	0.0268391	0	48.6598	yes
elf45	50	25	16505	7395	13	0.250741	1	0.102271	yes
elf45	90	50	2631	16505	8	0.0630142	0	4.51913	no
elf45	105	90	13471	2631	11	0.262318	1	1.03165	no
elf45	145	105	54736	13471	14	0.0942292	2	0.928379	no
elf45	180	145	227	54736	6	0.011539	3	4.47971	no
elf45	225	180	2003	227	5	0.0468643	1	2.67178	no
elf45	252	225	7282	2003	5	0.127787	0	1.12801	no
elf45	275	252	340	7282	3	0.0106807	0	33.6042	no
elf45	310	275	25	340	1	0.00840684	0	41.6438	no
elf45	346	310	3439	25	2	0.0126138	0	37.8482	no
elf45	375	346	1891	3439	2	0.00895272	0	18.9646	no
elf45	405	375	46	1891	2	0.01205	0	42.8751	no
elf45	430	405	252	46	1	0.0266356	0	25.5034	no
elf45	450	430	3623	252	2	0.03216	0	2.17561	no
elf45	475	450	344985	3623	15	0.0944166	8	6.05857	no
elf45	503	475	1201	344985	16	0.167155	4	0.491905	no
elf45	522	503	1448	1201	5	0.262637	2	0.200631	yes
elf47	50	25	2079	2160	9	0.213576	1	0.121399	no
elf47	70	50	690	2079	4	0.209718	1	0.418175	no
elf47	115	70	14551	690	11	0.0176375	2	17.9385	no
elf47	150	115	13602	14551	11	0.0514716	0	3.85255	no
elf47	175	150	17804	13602	7	0.00571665	0	18.1008	no
elf47	205	175	365	17804	6	0.101126	0	0.574788	no
elf47	241	205	1347	365	2	0.056637	0	1.65646	no
elf47	274	241	6988	1347	3	0.00623951	0	40.8484	no
elf47	325	274	11217	6988	3	0.00393316	0	24.9917	no
elf47	350	325	18026	11217	4	0.0118015	0	13.0225	no
elf47	386	350	4866	18026	4	0.00459718	0	30.7638	no
elf51	120	96	42	173	0		0		no
elf51	151	120	570	42	0		0		no
elf51	196	151	5033	570	5	0.0290654	0	1.66244	no
elf51	215	196	8577	5033	7	0.16156	0	0.457609	no
elf51	255	215	11760	8577	16	0.106995	2	0.195945	no
elf51	292	255	23575	11760	21	0.175261	3	0.0412937	no
elf51	310	292	5698	23575	16	0.16779	0	2.60232	no
elf7	91.5	85	197905	1882	7	0.337169	2	6.14004	no
elf7	94.5	91.5	91124	197905	9	1.58784	1	0.219894	no
elf7	97.5	94.5	440836	91124	10	1.52914	1	0.317355	no
elf7	108	97.5	756	440836	12	0.969143	7	0.00216838	no
elf7	129	108	371	756	7	0.269889	4	0.155604	no
elf7	165	129	1541	371	7	0.145365	2	0.205757	no
elf7	188	165	2215	1541	8	0.00751769	0	39.4355	no
elf7	204	188	251	2215	7	0.318599	2	0.360134	no
Table S9 Percentage contribution of read counts explicable by diffusion between adjacent samples
