# Supplementary material for: Pleistocene-Holocene sedaDNA reconstruction of Southern Doggerland reveals early colonization before inundation consistent with northern refugia.
Source: Research Square preprint supplement (doi:10.21203/rs.3.rs-3296992/v1), 2023-09-21
Supplement: Supplementary file 12 [file e24f4e0a3c9d4b95b0ce9ccf.xlsx]

## Sheet: Sheet1
Guild	Number of taxa	Guild influence	Guild nature		Taxa
1	8	1.17768	wet meadow		Carduinae Caryophyllaceae Plantaginaceae Sanguisorbeae Myrtales Agrostidinae Coleanthinae Polypodiopsida
2	4	0.818942	meadow		Cichorieae Orchidaceae Astereae Solanales
3	2	0.0200814			Gentianeae Jungermanniidae
4	1	0.0766655			Caryophyllales
5	3	0.0128648			Poinae Hypnales
6	2	0.133911	cold heath		Ericaceae Dryadoideae
7	2	2.87362	marsh		Phragmites Paniceae
8	9	6.42025	meadow		Stuckenia Rhamnaceae Mentheae Apiales Anthemideae core genistoids Lythraceae Polypodiidae Polypodiales
9	2	0.00499317	meadow		Veroniceae Helianthemum
10	2	0.109093	marshy		Cornus Juncaceae
11	16	1.18857	boggy/woodland		Typhaceae Typha Salicornioideae Aquifoliales Ilex Berberidaceae Mentha Molluginaceae Geranium Neottia Nartheciaceae Aristolochiaceae Artemisiinae Panicum Thelypteridaceae Cephaloziineae
12	13	37.0715	meadow/marsh		Sparganium Arundinoideae Artemisia Berberidoideae Taraxacum Lobelia Epidendroideae Corallorhiza Caprifoliaceae PACMAD clade Panicoideae Aspleniineae Marchantiophyta
13	7	0.027353	disturbed woodland		Pinaceae Juglans Lathyrus Urticaceae Sanguisorba Deschampsia Equisetaceae
14	21	2.77577	pond/meadow		Ceratophyllum Ericoideae Caesalpinioideae Sapindaceae Achillea Cirsium Campanula Primula Salvia Solanum Vicia Aroideae Cypripedioideae Calypsoinae Lilium Boraginales Astragalus Avena Elymus Anthocerotophyta Jungermanniales
15	2	0.0126459			Utricularia Marchantiidae
16	6	0.0787324	meadow		Eleocharis Boraginaceae Gentianaceae Pedicularideae Caltha Pteridoideae
17	13	1.71702	boggy meadow		Berula erecta Cladium Strobus Daucus carota Eupatorium Arnica Asphodeloideae Orchideae Oxalidales Thymelaeaceae Viscaceae Andropogoneae Pteridium
18	13	103.09	shallow marine marsh		Alismataceae Sagittaria Lemnoideae Schoeneae Nymphaeales Nymphaeaceae Zosteraceae Zostera Droseraceae Araceae Liliaceae Malvales Liliales
19	11	0.0521227	pond/woodland		Stuckenia filiformis Cornales Vaccinium Fagus Anthemidinae Tanacetum Mediterranean clade Lithospermeae Erodium Amaryllidoideae Jungermanniopsida
20	5	0.624324			Lauraceae Crepidinae Trichosporeae Juncus Dicranidae
21	1	0.00031152			Fabales
22	11	1.30632	pine woodland meadow		Larix Ziziphus Orobancheae Cactineae Colurieae Geum Fragaria Fabaceae Papilionoideae Eriocaulaceae Bryidae
23	1	0.00213266			Cistaceae
24	14	1.81065	Hawthorn woodland		Lentibulariaceae Adoxaceae Viburnum Crataegus Ulmaceae Impatiens sect. Impatiens Nolinoideae Iris Neottieae Araliaceae Dipsacales Arecaceae Athyriaceae Phegopteridoideae
25	25	2.20351	Pine woodland meadow		Arundineae Daucus Cabombaceae Rhodiola Pinidae Pinus Acereae Vitaceae Scandiceae Senecio Cichorioideae Impatiens Pyrola Rubiaceae Grammica Cucurbitales Cannabaceae Humulus Gesneriaceae robinioid clade Hordeum Adiantum Bryophyta Bryophytina Bryopsida
26	14	66.2729	Willow woodland		Potamogetonaceae Betulaceae Alnus Betula Salicaceae Saliceae Populus Salix Pyroleae Nepetoideae Polygonoideae Persicarieae Asteroideae Malvoideae
27	8	0.446327			Crassulaceae Selineae Hedysarum Camelineae lamiids Aveninae Marchantiales Apiaceae
28	11	0.0481263	cold heath/scrub		Cupressales Arbutoideae Dryas Thymus Bistorta Galegeae Medicago Anchonieae Lycopodiopsida Linaceae Cheilanthoideae
29	5	3.79414	disturbed woodland		Cupressaceae Juglandaceae Sapindales Rutaceae Triticeae
30	3	0.171888	ash woodland		Oleeae Orchidoideae Gnetidae
31	3	3.42917			Fagales NPAAA clade malvids
32	12	0.389297			Characeae Armeria Celastraceae Rubus Pyroloideae Cynoglossoideae Lamioideae Sileneae Potentilleae incertae sedis Sanguisorbinae Santalales Calamagrostis
33	27	12.6577	temperate woodland		Salicornia Asparagus Chenopodioideae Atripliceae Tamaricaceae Lonicera Corylus Fagaceae Quercus Maleae Tilioideae Tilia Laurales Apieae Iridaceae Piperales Lycopodiaceae Lycopodioideae Cercideae Malvaceae Chloridoideae Zoysieae Sporobolus Danthonioideae Cenchrinae Pteridaceae Sphagnum
34	6	1.50367			Taxaceae Rumiceae Brassica Geraniaceae Onagroideae Hordeinae
35	16	19.48	marsh		Hydrocharitaceae Nymphaea Cymodoceaceae Ruppia Molinieae Chenopodium Salicornia subg. Salicornia Suaeda Plumbaginaceae Limonium Chenopodiaceae Euphorbiaceae Dioscoreales Melanthiaceae Aristolochia Solanaceae
36	10	0.025899	meadow		Oleaceae Aster Iridoideae Orchidinae Sophora Helictotrichon Eragrostideae Sporobolinae Athyrium incertae sedis Blasiaceae
37	14	2.15663	meadow		Oenantheae Primulaceae Rubioideae Orobanchaceae Pedicularis Plantago Potentilleae Fragariinae Arabidopsis Thalictrum Apiineae Gentianales Rosoideae Cyperaceae
38	1	0.00274825			Apocynaceae
39	4	1.92096	meadow		Cuscuta Amyridoideae Lamiales Marchantiopsida
40	2	0.034522	meadow		Campanulaceae Hologalegina
41	2	1.11245	meadow		Trifolieae Rosaceae
42	1	0.196194			Ericales
43	1	0.00689728	meadow		Anemoneae
44	2	0.00946095	shrubby meadow		Hamamelidaceae Fritillaria
45	12	6.37336	Elm forest		Salviniaceae Phyllodoceae Amygdaleae Prunus Ulmus Hedera Spiraeeae Epidendreae Amygdaloideae Abildgaardieae Brachypodium Cystopteridaceae
46	7	19.1537	grassland		Menyanthaceae Ribes Apioideae Scutellaria Poaceae BOP clade Polytrichaceae
47	23	7.05256	pond/meadow		Potamogeton Puccinellia Galium Potentilla Saxifragaceae Papaver Ranunculoideae Delphinieae Ranunculeae Ranunculus Thalictroideae Asteraceae Gnaphalieae Lamiaceae Stachydeae Polygonaceae Loteae Rosoideae incertae sedis Ranunculales Ranunculaceae Poeae Chloroplast Group 2 (Poeae type) Equisetum Pottiaceae
48	13	4.21724	shrubby heath		Oryzeae Suaedoideae Empetrum Vaccinioideae Vaccinieae Ligustrum Anacardiaceae Lotus Veratrum Actaea Acrogymnospermae Triticodae Dryopteris
49	20	1.146	meadow		Lycopus Ephedra Empetreae Detarioideae Ambrosia Hieracium Androsace IRL clade Arabideae Brassiceae Brassica oleracea Allium 50 kb inversion clade Brassicaceae Alysseae Proteales Porellales Jubulineae Lejeuneaceae Radula
50	9	1.46253	wet meadow		Haloragaceae Myriophyllum Chara Cochlearieae Tussilagininae Veronica Fabeae Senecioneae Loliinae
51	49	4.7495	wet meadow/woodland		Fontinalaceae Marsileaceae Nuphar Fuireneae Bolboschoenus Salicornia subg. Arthrocnemoides Cochlearia Sedum Taxus Lycium Castanea Elaeagnaceae Pyrus Vitis Berberis Chrysanthemum Ligularia Myosotideae Amaranthus Silene Cucurbitaceae Lepidium Agavoideae Ophrys Cimicifugeae Selaginella Acanthoideae Convolvulaceae Phaseoleae Agrimoniinae Cypereae Cyperus Stipa Secale Thinopyrum Setaria Ophioglossidae…
52	61	2.58687	wet meadow/woodland		Cicuta Schoenoplectus Eriophorum Scirpus Rhododendron Hippocastanoideae Pinus apioid superclade Scandicinae Matricariinae Erigeron Inulinae Inula Senecioninae Carduoideae Cardueae Centaureinae Centaurea Hieraciinae Hypochaeridinae Cynoglossum Swertiinae Rubieae Salvia incertae sedis Rhinantheae Euphrasia Rhinanthus Alsineae Gypsophila Persicaria Rumex Oxytropis Trifolium Violaceae Viola Draba Sax…
53	27	2.89512	wet meadow/woodland		Eriocaulon Allioideae Solanoideae C4 Cyperus incertae sedis Isoetes Posidonia Beta vulgaris Cynomorium Rhamneae Malus Rosa Monotropeae Dysphania Brassica rapa Camelina Tofieldiaceae Amaryllidaceae Hyacinthaceae Crocoideae Dioscoreaceae Zygophyllales Stipeae Aristideae Asplenium Polypodioideae Bryanae Bryaceae
54	12	0.720524	wet woodland		Wolffia Najas Quercus robur Rhamnus Viscum Monogynella Malaxidinae Oxalidaceae Eragrostis Athyrium Blechnaceae Dennstaedtiaceae
55	5	0.372363			Asparagaceae Dioscorea Colchicaceae Brassicales Thelypteridoideae
56	1	0.00181061	meadow		Filipendula
Table S5 Plant Guild Membership
