# Supplementary material for: Pleistocene-Holocene sedaDNA reconstruction of Southern Doggerland reveals early colonization before inundation consistent with northern refugia.
Source: Research Square preprint supplement (doi:10.21203/rs.3.rs-3296992/v1), 2023-09-21
Supplement: Supplementary file 14 [file ee43272537b655697c85835e.xlsx]

## Sheet: Sheet1
	Southern River System
guild	ELF053_336	ELF053_289	ELF053_275	ELF053_214	ELF053_179		ELF049_361	ELF049_295		ELF050_595	ELF050_450	ELF050_354	ELF050_250		ELF047_386	ELF047_350	ELF047_325	ELF047_274	ELF047_241	ELF047_205	ELF047_175	ELF047_150	ELF047_115	ELF047_70	ELF047_50	ELF047_25		ELF047A_354	ELF047A_256	ELF047A_150	ELF047A_050		ELF045_522	ELF045_503	ELF045_475	ELF045_450	ELF045_430	ELF045_405	ELF045_375	ELF045_346	ELF045_310	ELF045_275	ELF045_252	ELF045_225	ELF045_180	ELF045_145	ELF045_105	ELF045_90	ELF045_50
1	0	0	0	0	0		0.00854701	0.00513259		0	0	0	0		0.00247525	0.000740741	0	0	0	0	0.000630915	0	0.00124844	0.0793651	0	0.00891266		0	0	0	0		0	0.0178571	0.000947628	0	0	0	0	0.00767263	0	0	0	0	0.0306122	0	0.0032763	0	0.000667111
2	0	0	0	0	0		0	0		0	0	0	0		0	0.00148148	0.00147059	0	0	0	0.00126183	0.00090009	0.00062422	0	0	0		0	0	0	0		0	0	0.000884453	0	0.0392157	0	0.00909091	0.00255754	0	0.02	0	0	0	0.00130005	0.00145613	0	0.00400267
3	0	0	0	0	0		0.017094	0		0	0	0	0		0	0	0	0	0	0	0	0	0	0	0	0		0	0	0	0		0	0	0	0	0	0	0	0	0	0	0	0	0	0	0	0	0
4	0	0	0	0	0		0	0		0	0	0	0		0	0	0	0	0	0	0.00126183	0.00090009	0	0	0.002331	0		0	0	0	0		0	0	0	0	0	0	0	0.00255754	0	0	0.00170068	0	0	0.000520021	0	0	0
5	0	0	0	0	0		0	0.00171086		0	0	0	0		0	0	0	0	0	0	0	0	0	0	0	0		0	0	0	0		0	0	0	0	0	0	0	0	0	0	0	0	0	0	0	0	0
6	0	0	0	0	0		0.00854701	0.000855432		0	0	0	0		0	0	0	0	0	0	0	0	0	0	0	0		0	0	0	0		0	0	0	0	0	0	0	0	0	0	0	0	0	0	0	0	0
7	0	0	0	0	0		0	0		0	0	0	0		0	0	0	0	0.0310559	0	0.00189274	0.00090009	0	0	0.002331	0		0.0666667	0.111111	0	0.00454545		0	0	0.000694927	0	0	0	0.00454545	0	0	0	0	0	0	0.000780031	0.00182017	0	0.00333556
8	0	0.0769231	0	0	0		0	0.0025663		0	0	0	0		0.0222772	0.00518519	0.00147059	0.008726	0.0124224	0	0.0189274	0.019802	0.0524345	0.206349	0.044289	0.0962567		0	0	0	0		0.0555556	0.308673	0.0185103	0.0026178	0.137255	0.0666667	0.118182	0.0588235	0	0.08	0.00510204	0.125	0.438776	0.00572023	0.0826356	0.00346021	0.0627085
9	0	0	0	0	0		0	0		0	0	0	0		0	0	0	0	0	0	0	0	0	0	0	0.00178253		0	0	0	0		0	0	0	0	0	0	0	0	0	0	0	0	0	0	0	0	0
10	0	0	0	0	0		0	0.000855432		0	0	0	0		0	0	0	0	0	0	0	0	0	0	0	0		0	0	0	0		0	0	0.00012635	0	0	0	0	0	0	0	0	0	0	0.00026001	0	0	0
11	0	0	0	0	0		0	0		0	0	0	0		0.0049505	0.00148148	0	0.0052356	0	0	0.00189274	0.00810081	0.00436954	0	0.004662	0.0178253		0	0	0	0		0	0.0408163	0.00265336	0	0	0	0.00454545	0.00511509	0	0	0.00170068	0.00892857	0	0.00156006	0.0065526	0.00346021	0.0113409
12	0	0	0	0	0		0	0.00342173		0	0	0	0		0.029703	0.02	0.00294118	0.017452	0.0496894	0.0526316	0.0511041	0.0540054	0.154182	0.047619	0.0582751	0.338681		0.0666667	0	0	0.00454545		0	0.354592	0.0717038	0	0.0392157	0.133333	0.0681818	0.104859	0	0.02	0.0544218	0.301339	0	0.0457618	0.17328	0.0276817	0.0553702
13	0	0	0	0	0		0	0		0	0	0	0		0	0	0	0	0	0	0.000630915	0	0	0	0	0		0	0	0	0		0	0	0	0	0	0	0.00454545	0	0	0	0.00340136	0	0	0	0	0	0
14	0	0	0	0	0		0.00854701	0.00171086		0	0	1	0		0	0.00222222	0	0	0	0	0.000630915	0	0	0	0	0		0	0	0	0		0	0	0.000505401	0.0052356	0	0	0.00454545	0	0	0	0	0	0	0.00026001	0	0	0
15	0	0	0	0	0		0	0		0	0	0	0		0	0	0	0	0	0	0	0	0	0	0	0		0	0	0	0		0	0	0.000379051	0	0	0	0	0	0	0	0	0	0	0	0	0	0
16	0	0	0	0	0		0	0		0	0	0	0		0	0	0	0	0	0	0	0	0.00062422	0	0	0		0	0	0	0		0	0	0	0	0	0	0	0	0	0	0	0	0	0	0	0	0
17	0	0	0	0	0		0	0		0	0	0	0		0	0.0037037	0	0.0034904	0	0	0.00126183	0.00270027	0.00436954	0	0.037296	0		0	0	0	0		0	0	0.00265336	0.0026178	0	0	0.00454545	0.00255754	0	0	0.00170068	0	0.0306122	0.00182007	0.0021842	0	0.00333556
18	0	0.0769231	0	0	0		0	0		0	0	0	0		0.834158	0.891111	0.951471	0.867365	0.801242	0.0789474	0.734385	0.687669	0.462547	0.380952	0.179487	0.0998217		0.4	0.611111	0.5	0.836364		0.672222	0.107143	0.742624	0.934555	0.254902	0.133333	0.381818	0.485934	0.666667	0.38	0.697279	0.171875	0.153061	0.75637	0.273389	0.871972	0.526351
19	0	0	0	0	0		0	0		0	0	0	0		0	0	0	0	0	0	0	0	0.00124844	0	0.004662	0		0	0	0	0		0.00555556	0	6.31752e-05	0	0	0	0	0	0	0	0	0.00669643	0	0.00026001	0.000364033	0	0
20	0	0	0	0	0		0	0		0	0	0	0		0	0	0	0	0	0	0	0	0.00124844	0	0.004662	0		0	0	0	0		0	0	0	0	0	0	0	0	0	0	0	0	0.0102041	0	0	0	0.000667111
21	0	0	0	0	0		0	0		0	0	0	0		0	0	0	0	0	0	0	0	0	0	0	0		0	0	0	0		0	0	6.31752e-05	0	0	0	0	0	0	0	0	0	0	0	0	0	0
22	0	0	0	0	0		0	0		0	0	0	0		0.00247525	0	0.00147059	0	0	0.0263158	0.00126183	0.00180018	0.00062422	0	0	0.00178253		0	0	0	0		0.0777778	0.00255102	0.000315876	0.0026178	0.117647	0.133333	0	0.0179028	0	0.06	0	0	0	0	0.000728067	0	0.0133422
23	0	0	0	0	0		0	0		0	0	0	0		0	0	0	0	0	0	0	0	0	0	0	0		0	0	0	0		0	0	0	0	0	0	0	0	0	0	0	0	0	0	0	0	0
24	0	0	0	0	0		0	0		0	0	0	0		0.00247525	0.000740741	0.00147059	0.008726	0	0	0.00252366	0.00180018	0.00749064	0.00793651	0.002331	0		0	0	0	0.00454545		0	0.0153061	0.00442226	0.0026178	0	0	0.0136364	0.00511509	0	0.06	0.00340136	0.00892857	0	0.00182007	0.00364033	0	0.006004
25	0	0.0769231	0	0	0		0.034188	0.011976		0	0	0	0		0	0	0	0	0	0	0	0.00090009	0.00062422	0	0.002331	0		0	0	0	0		0.00555556	0	0.000189526	0	0	0	0	0.00255754	0	0	0.00170068	0	0.0102041	0.00026001	0.000364033	0	0
26	0.333333	0.0769231	0	0.666667	0		0.700855	0.697177		0	0	0	0		0.0346535	0.0155556	0.00882353	0.0383944	0.0310559	0.0526316	0.0498423	0.0747075	0.141074	0.031746	0.0722611	0.251337		0.333333	0.0555556	0	0.109091		0.0388889	0.0510204	0.0958368	0.013089	0.117647	0.4	0.254545	0.0690537	0	0.14	0.0527211	0.292411	0.0510204	0.0280811	0.384783	0.0484429	0.213476
27	0	0	0	0	0		0	0.00171086		0	0	0	0		0	0	0	0	0.00621118	0	0.000630915	0	0.00062422	0	0	0		0	0	0	0		0	0	6.31752e-05	0	0	0	0	0	0	0	0.00170068	0	0	0.000780031	0	0	0.00133422
28	0	0	0	0	0		0	0.00342173		0	0	0	0		0	0	0	0	0	0	0	0	0	0	0	0		0	0	0	0		0	0	0	0	0	0	0	0	0	0	0	0.00223214	0	0	0	0	0
29	0	0	0	0	0		0	0		0	0.8	0	0		0	0	0	0.0017452	0.00621118	0.513158	0.00630915	0.00180018	0.00436954	0.00793651	0.034965	0.00713012		0	0	0	0		0	0.0204082	0	0	0.0784314	0	0.0181818	0.0102302	0	0	0.0442177	0	0.0204082	0.00026001	0	0	0.00466978
30	0	0	0	0	0		0	0		0	0	0	0		0	0	0	0	0	0	0	0	0	0	0	0		0	0	0	0		0	0	0.000252701	0	0	0	0	0	0	0	0	0	0	0	0	0	0
31	0	0	0	0	0		0	0		0	0	0	0		0.00247525	0.00148148	0.00294118	0.0034904	0	0.0263158	0.0044164	0.00630063	0.011236	0	0.0815851	0.0124777		0	0	0	0		0.0166667	0	0.000189526	0.0026178	0.0588235	0	0.00909091	0	0	0	0.00340136	0	0	0.00598024	0	0.00692042	0.000667111
32	0	0.0769231	0	0	0		0	0		0	0	0	0		0	0	0	0	0	0	0	0	0	0	0	0		0	0	0	0		0	0	0	0.0026178	0	0	0	0	0	0	0	0	0	0	0	0	0.00133422
33	0	0	0	0	0		0	0.000855432		0	0	0	0		0.00247525	0.0037037	0	0.0034904	0.0310559	0.0131579	0.00757098	0.00810081	0.00873908	0	0.382284	0.00356506		0	0	0	0		0	0.00255102	0.00259018	0.0026178	0.0392157	0	0.00454545	0.0255754	0	0.02	0.0085034	0.00223214	0	0.0109204	0.0101929	0	0.00533689
34	0	0.0769231	0	0	0		0.00854701	0.0025663		0	0	0	0		0	0	0	0	0	0	0	0	0	0	0	0		0	0	0	0		0	0	0.000252701	0.0052356	0	0	0.00454545	0	0	0	0	0	0	0.00026001	0.000364033	0	0.00200133
35	0	0	0	0.333333	0		0	0.00598802		0	0	0	0		0.00247525	0.0103704	0.00588235	0.0122164	0.0124224	0	0.014511	0.0207021	0.0174782	0.0396825	0.013986	0.0106952		0.0666667	0	0	0.0227273		0.0222222	0.0153061	0.0118769	0.0026178	0.0392157	0	0.0227273	0.0204604	0	0	0.0085034	0.03125	0	0.0200208	0.0185657	0.0276817	0.0353569
36	0	0	0	0	0		0	0		0	0	0	0		0	0	0	0	0	0	0	0	0	0	0	0		0	0	0	0		0	0	0	0	0	0	0	0	0	0.02	0	0	0	0	0.000364033	0	0
37	0	0	0	0	0		0.025641	0.0342173		0	0	0	0		0.00247525	0.000740741	0	0.0017452	0	0	0.00126183	0.00090009	0.00749064	0	0.00699301	0.00356506		0	0	0	0.00454545		0	0.00255102	0.00176891	0	0	0	0.0136364	0	0	0.06	0.00170068	0.0111607	0	0.00182007	0.0032763	0.00692042	0.00667111
38	0	0	0	0	0		0	0		0	0	0	0		0	0.000740741	0	0	0	0	0	0	0	0	0	0		0	0	0	0		0	0	0	0	0	0	0	0	0	0	0	0	0	0	0	0	0
39	0	0.0769231	0	0	0		0	0		0	0	0	0		0	0.00148148	0	0	0	0	0.00126183	0.00090009	0.00062422	0	0.002331	0		0	0.0555556	0	0		0	0	0	0	0	0	0	0	0	0.02	0	0	0	0.00026001	0	0	0.000667111
40	0	0	0	0	0		0.00854701	0.00171086		0	0	0	0		0	0	0	0	0	0	0	0	0	0	0	0		0	0	0	0		0	0	6.31752e-05	0	0	0	0	0	0	0	0	0	0	0	0	0	0
41	0	0	0	0	0		0	0		0	0	0	0		0	0.000740741	0	0	0	0	0.000630915	0.00090009	0	0	0.002331	0		0	0	0	0		0	0	6.31752e-05	0	0	0	0	0	0	0	0.00170068	0	0	0.00026001	0	0	0
42	0	0	0	0	0		0	0		0	0	0	0		0	0	0	0	0	0.0263158	0.000630915	0	0.00124844	0	0	0		0	0	0	0		0	0	0	0	0	0	0	0	0	0	0	0	0	0.00026001	0	0	0
43	0	0	0	0	0		0	0		0	0	0	0		0	0	0	0	0	0	0	0	0	0	0	0		0	0	0	0		0	0	0	0	0	0	0	0	0	0	0	0	0	0	0	0	0
44	0	0	0	0	0		0	0		0	0	0	0		0	0	0	0	0	0	0	0	0	0	0	0		0	0	0	0		0	0	0	0	0	0	0.00454545	0	0	0	0	0	0	0.00026001	0	0	0
45	0	0	0	0	0		0	0		0	0	0	0		0.00247525	0	0	0	0	0	0	0.00180018	0.0031211	0.00793651	0	0		0.0666667	0.0555556	0	0		0	0	0.000884453	0	0.0196078	0	0	0.0102302	0	0	0.00170068	0	0	0.00546022	0.00145613	0	0.00200133
46	0	0	0	0	0		0	0.00171086		0	0	0	0		0.049505	0.0296296	0.0191176	0.0209424	0.00621118	0.197368	0.0839117	0.0873087	0.0980025	0.031746	0.027972	0.117647		0	0	0	0		0	0.00255102	0.0343041	0.0078534	0	0	0.0181818	0.0818414	0	0.04	0.0884354	0	0.0102041	0.0949038	0.0054605	0	0.0160107
47	0	0.230769	1	0	0		0.102564	0.0889649		0	0	0	0		0	0.00444444	0.00147059	0.0017452	0	0	0.00504732	0.00270027	0.00374532	0.00793651	0.004662	0.00891266		0	0	0	0.00909091		0	0.00510204	0.00176891	0.0026178	0	0	0.00909091	0.00255754	0	0	0.00510204	0.00669643	0	0.00286011	0.00254823	0.00346021	0.00466978
48	0.666667	0	0	0	0		0	0		0	0	0	0		0	0.000740741	0	0	0	0	0	0	0.00062422	0	0.004662	0		0	0	0	0		0.00555556	0	0.000189526	0	0	0	0	0.00255754	0	0	0	0.00223214	0	0	0	0	0
49	0	0	0	0	0		0	0.00769889		0	0	0	0		0	0	0	0	0	0	0.000630915	0.00450045	0.00187266	0.0396825	0.00699301	0.00178253		0	0	0	0		0	0	0.000315876	0	0	0	0	0.00767263	0	0.02	0	0	0	0.00130005	0	0	0
50	0	0.0769231	0	0	0		0	0.0102652		0	0	0	0		0	0	0	0	0	0	0	0	0	0	0	0		0	0	0	0		0	0	0	0	0	0	0	0	0	0	0	0	0	0	0	0	0.000667111
51	0	0	0	0	0		0	0.000855432		0	0	0	0		0.00247525	0.00148148	0.00147059	0.0034904	0.0124224	0	0.00126183	0.00090009	0.00062422	0.015873	0.011655	0		0	0.111111	0.5	0		0.1	0.00510204	0.000189526	0.0052356	0.0392157	0.133333	0.0136364	0.0537084	0	0.06	0.0102041	0.0178571	0.0102041	0.0026001	0.0178376	0	0.00800534
52	0	0	0	0	0		0.0769231	0.114628		0	0	0	0		0.00247525	0.00222222	0	0	0	0.0131579	0.00189274	0.00360036	0.0031211	0.00793651	0.002331	0.0142602		0	0	0	0.00454545		0	0.00510204	0.00138985	0	0	0	0	0.00255754	0	0	0	0.00669643	0	0.00390016	0.0021842	0	0.00333556
53	0	0.153846	0	0	0		0	0		0	0.2	0	0		0	0	0	0	0	0	0	0.00090009	0	0.00793651	0	0		0	0	0	0		0	0	6.31752e-05	0	0	0	0	0	0.333333	0	0	0.00223214	0	0.00104004	0.000364033	0	0.00133422
54	0	0	0	0	0		0	0		0	0	0	0		0	0	0	0.0017452	0	0	0.00126183	0.00180018	0.00124844	0.0793651	0	0.00178253		0	0	0	0		0	0.0153061	0.000568577	0	0	0	0	0.0179028	0	0	0	0	0.234694	0.00156006	0.000364033	0	0.00133422
55	0	0	0	0	0		0	0		0	0	0	0		0	0	0	0	0	0	0.00126183	0.00270027	0.0031211	0	0.002331	0.00178253		0	0	0	0		0	0.0280612	0.000568577	0.0052356	0.0196078	0	0.0136364	0	0	0	0.00170068	0.00223214	0	0.000520021	0.00254823	0	0.00400267
56	0	0	0	0	0		0	0		0	0	0	0		0	0	0	0	0	0	0	0	0	0	0	0		0	0	0	0		0	0	6.31752e-05	0	0	0	0	0	0	0	0	0	0	0	0	0	0
Table S6 Proportion Guild membership of sedaDNA samples
[truncated: 233 more columns]
