# Supplementary material for: Pleistocene-Holocene sedaDNA reconstruction of Southern Doggerland reveals early colonization before inundation consistent with northern refugia.
Source: Research Square preprint supplement (doi:10.21203/rs.3.rs-3296992/v1), 2023-09-21
Supplement: Supplementary file 15 [file f06f79807bf398fbc47cd5a5.xlsx]

## Sheet: Sheet1
		Late Pleistocene	Allerød	Younger Dryas	Pleistocene/ Holocene boundary	Early Holocene I	Early Holocene II	Early Holocene III	Early Holocene IV	Tsunami period	Mid Holocene I	Mid Holocene II	Late Holocene
	secure samples	13	14	2	20	27	25	28	5	2	27	25	19
	species	13900-40000	12900-13900	11700-12900	10500-11700	9500-10500	9000-9500	8500-9000	8300-8500	8000-8300	7000-8000	6000-7000	3000-6000
	Salix	ELF34-202 ELF34-170-180	ELF39-460,415,384,355 ELF51-310,292,255,215 ELF54-330 ELF47A-354 ELF54-336-350 ELF34-160-170, 132-142 ELF54-330-341,361-372,372-380	ELF34A-282 ELF51-135-140	ELF45-503,475,450 ELF34A-262 ELF33-176,155 ELF59A-320,250,190,135 ELF2-298-308 ELF54-326-336 ELF51-120-135 ELF34-62-72	ELF19-365,342,310,265 ELF45-430,405,375,346,275,252 ELF54-315 ELF31-56,43 ELF20-188 ELF32A-177,153 ELF20-202-215,197-202,187-197 ELF51-90-120 ELF54-316-326	ELF19-238,206,195,170,146,134 ELF34A-183,172 ELF45-225,180 ELF47-386 ELF31A-107,88 ELF32A-,95,74 ELF7-204 ELF20-139 ELF7-201-214 ELF20-165-187 ELF54-297-316,280-297	ELF39-321,275 ELF47-350,325,274,241,175,150 ELF1A-212 ELF2-289 ELF7-188,165,108,97.5,94.5,91.5 ELF2-287-298 ELF1A-160-350	ELF47-115,50,25		ELF34A-81 ELF39-250,225 ELF45-145,105 ELF3-130 ELF4-198,151 ELF59-378,359 ELF1A-100-110	ELF19-119,94 ELF47A-50 ELF45-90,50 ELF4-84 ELF54-140 ELF40A-487,350 ELF41-295,180,110 ELF39-175,145 ELF59-337,280,270,230,210 ELF60- 420,350	ELF19-33 ELF41-87 ELF54-58 ELF34A-63 ELF44-137,115,90 ELF42-350,250,151,65 ELF40A-298,197
	Betula	ELF34-170-180	ELF51-310,255,214 ELF54-336-350 ELF34-160-170,132-142 ELF51-155-247 ELF54-325-380	ELF51-135-140 ELF34-122-132,102-112,82-92 ELF51-133-141	ELF45-475 ELF34A-262 ELF59A-135 ELF33-195,155 ELF2-298-308 ELF54-326-336 ELF51-120-135 ELF2-295-307 ELF34-62-72	ELF19-265,310,342,365 ELF32A-177 ELF20-202-215,197-202,187-197 ELF51-90-120 ELF54-316-326	ELF19-170,206,238 ELF31A-88,107 ELF7-201-214 ELF20-165-187 ELF54-297-316,280-297 ELF20-178-190,175-178,165-175 ELF7-201-215	ELF47-115,150 ELF1A-167 ELF2-287-298,262-287 ELF1A-160-350 ELF7-192-201,110-192 ELF2-285-295 ELF7-193-201,183-193			ELF45-105 ELF39-250 ELF1A-100-110	ELF39-175 ELF59-210 ELF1A-90-100	ELF42-250
	Alnus	ELF5B-145,90	ELF39-460,415,384,355 ELF51-310,292		ELF45-503,475 ELF59A-190,135	ELF19-365,342,310,265 ELF45-375,252 ELF32A-177	ELF19-238,206,195,170 ELF34A-172 ELF45-225 ELF47-386 ELF7-201-214 ELF20-165-187 ELF54-297-316,280-297	ELF39-321,275 ELF47-175,150, 115 ELF1A-167 ELF2-289 ELF7-94.5 ELF1A-160-350 ELF2-262-287 ELF7-192-201,110-192	ELF47-115,50 ELF7-85		ELF39-250,225 ELF45-145,105 ELF1A-104 ELF1A-100-110	ELF45-50 ELF1A-95 ELF39-175 ELF4-84 ELF41-180 ELF59-230,210 ELF44A-97 ELF1A-90-100	ELF41-87 ELF34A-63 ELF42-350,250,65
	Quercus	ELF5B-90 ELF5A-76	ELF39-460,415,355		ELF59A-250,190,135 ELF33-203,195 ELF34-61 ELF33A-111 ELF2-298-308	ELF19-365 ELF45-346 ELF20-188 ELF32A-177 ELF20-192-201,110-192 ELF51-90-120	ELF19-238 ELF34A-195,183 ELF20-165-187 ELF7-201-214 ELF54-297-316,280-297	ELF7-108,97.5,94.5,91.5 ELF39-321,275 ELF47-175,150 ELF1A-212,167 ELF2-289 ELF2-287-298,262-287 ELF1A-160-350 ELF7-192-201,110-192			ELF39-250,225 ELF3-180 ELF1A-104 ELF45-145 ELF59-359 ELF1A-100-110	ELF19-94 ELF39-175,145 ELF44A-97 ELF1A-95 ELF4-84 ELF60-250 ELF1A-90-100	ELF41-87 ELF42-350,250,65 ELF44-115 ELF34A-63
	Corylus	ELF5B-90	ELF39-460,415,355		ELF59A-250,190,135 ELF2-298-308 ELF54-326-336 ELF51-120-135	ELF19-310,265 ELF45-346 ELF20-188 ELF32A-177,153 ELF20-202-215,197-202,187-197 ELF51-90-120 ELF54-316-326	ELF19-238 ELF32A-74 ELF20-111 ELF7-201-214 ELF20-165-187 ELF54-297-316,280-297	ELF39-321,275 ELF47-350,150 ELF7-108,97.5,94.5,91.5 ELF2-287-298, 262-287 ELF1A-160-350 ELF7-192-201,110-192	ELF47-115 ELF7-85		ELF39-250,225 ELF45-145 ELF34A-126 ELF59-359 ELF1A-100-110	ELF45-50 ELF41-180 ELF39-175,145 ELF44A-97 ELF59-270,210 ELF1A-90-100	ELF42-250,151,65 ELF34A-63
	Tilia		ELF39-415		ELF33-155	ELF32A-177		ELF39-321,275 ELF1A-160-350 ELF7-110-192			ELF39-250,225 ELF45-105 ELF1A-104 ELF4-198	ELF39-175 ELF59-270	ELF42-350,65
	Ulmus	ELF5B-145,90 ELF5A-76,70	ELF39-415,460,384,355 ELF51-310 ,292		ELF45-475 ELF34A-262 ELF59A-135 ELF33-195,155 ELF2-298-308 ELF51-120-135	ELF45-375,275 ELF31-43 ELF32A-177 ELF33-118 ELF20-202-215,197-202,187-197 ELF51-90-120	ELF32A-74,47 ELF7-201-214 ELF20-165-187 ELF54-280-297	ELF39-321,250 ELF47-175 ELF7-188,97.5,94.5,91.5 ELF1A-212 ELF2-287-298, 262-287 ELF1A-160-350 ELF7-192-201,110-192	ELF47-115,50 ELF7-85		ELF39-250,225 ELF45-145 ELF34A-126,81 ELF59-359 ELF1A-100-110	ELF45-50 ELF39-175,145 ELF1A-95 ELF44A-97 ELF4-84 ELF59-210 ELF1A-90-100	ELF42-250,151,65 ELF54-58 ELF34A-63
	Pterocarya	ELF5B-90			ELF59A-135	ELF19-365,310 ELF45-346,252	ELF19-238	ELF7-97.5	ELF7-85
	Pinus		ELF51-196		ELF19-400 ELF2-298-308 ELF51-120-135 ELF54-326-336	ELF19-365,310 ELF45-375,346 ELF20-202-215,197-202,187-197 ELF51-90-120 ELF54-316-326	ELF19-206 ELF7-201-214 ELF20-165-187 ELF54-297-316,280-297	ELF1A-212 ELF7-165,94.5,91.5 ELF2-287-298,262-287 ELF1A-160-350 ELF7-192-201,110-192			ELF1A-104 ELF39-250 ELF45-145 ELF1A-100-110	ELF1A-95 ELF1A-90-100
	Dryas		ELF39-355, ELF51-310			ELF19-365,310,265	ELF19-238,206,195,170 ELF31A-107,88
	Table S14. Species presence in secure sediments unlikely to be affected by sediment influxes
	SedaDNA data in black, pollen data in red (Bates et al 2022), plant macro data in green (Bates et al 2022).
